# Supplementary material
Source: PubMed Central journal article supplement (PMC6823852)
Supplement: 153263_1_supp_373968_pvs07s.pdf [file 153263_1_supp_373968_pvs07s.pdf]

| Glycoform | Data set | Exact mass | Charge | Calculated mass | Observed mass | Retention time | Comment   |
|-----------|----------|------------|--------|-----------------|---------------|----------------|-----------|
| 7-8-1-4   | NK08     | 6441.5033  | 4      | 1611.3828       | 1611.3808     | 42.3 to 43.7   | Annotated |

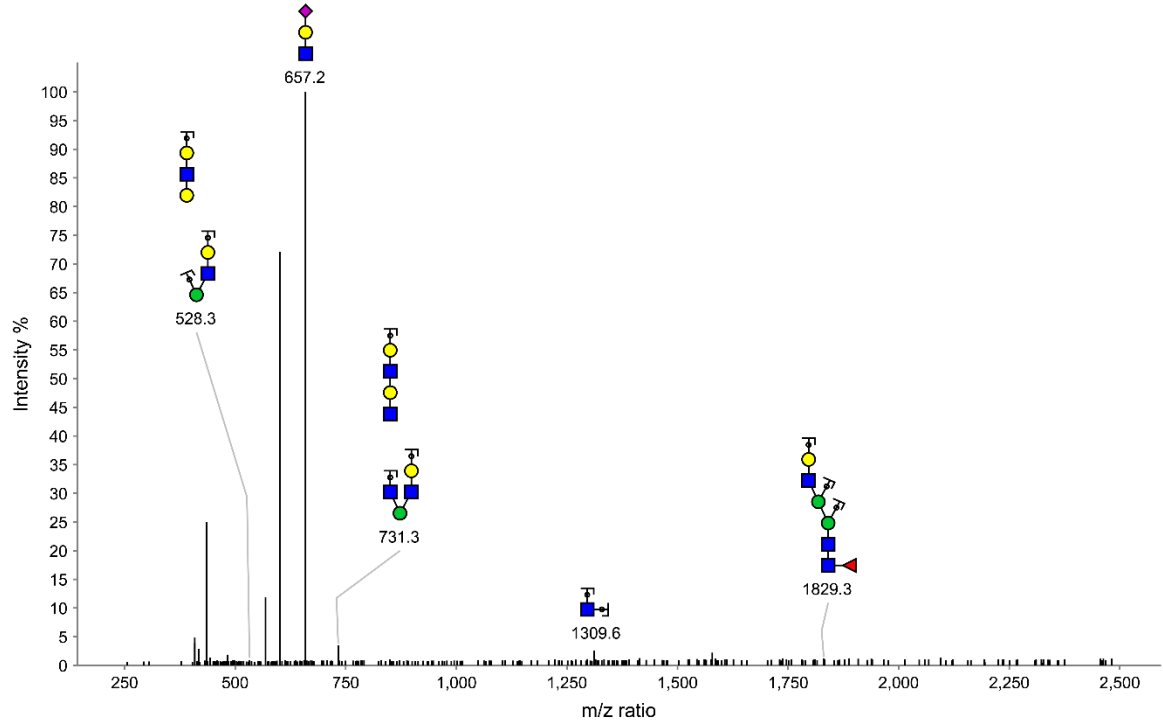

**CD16a N38 Peptide 1: KDSVTLKCQGAYSPEDNSTQW+IAM**

| Glycoform | Data set | Exact mass | Charge | Calculated mass | Observed mass | Retention time | Comment   |
|-----------|----------|------------|--------|-----------------|---------------|----------------|-----------|
| 8-9-1-3   | NK08     | 6515.5401  | 4      | 1629.8920       | 1629.8855     | 46.0 to 47.9   | Annotated |

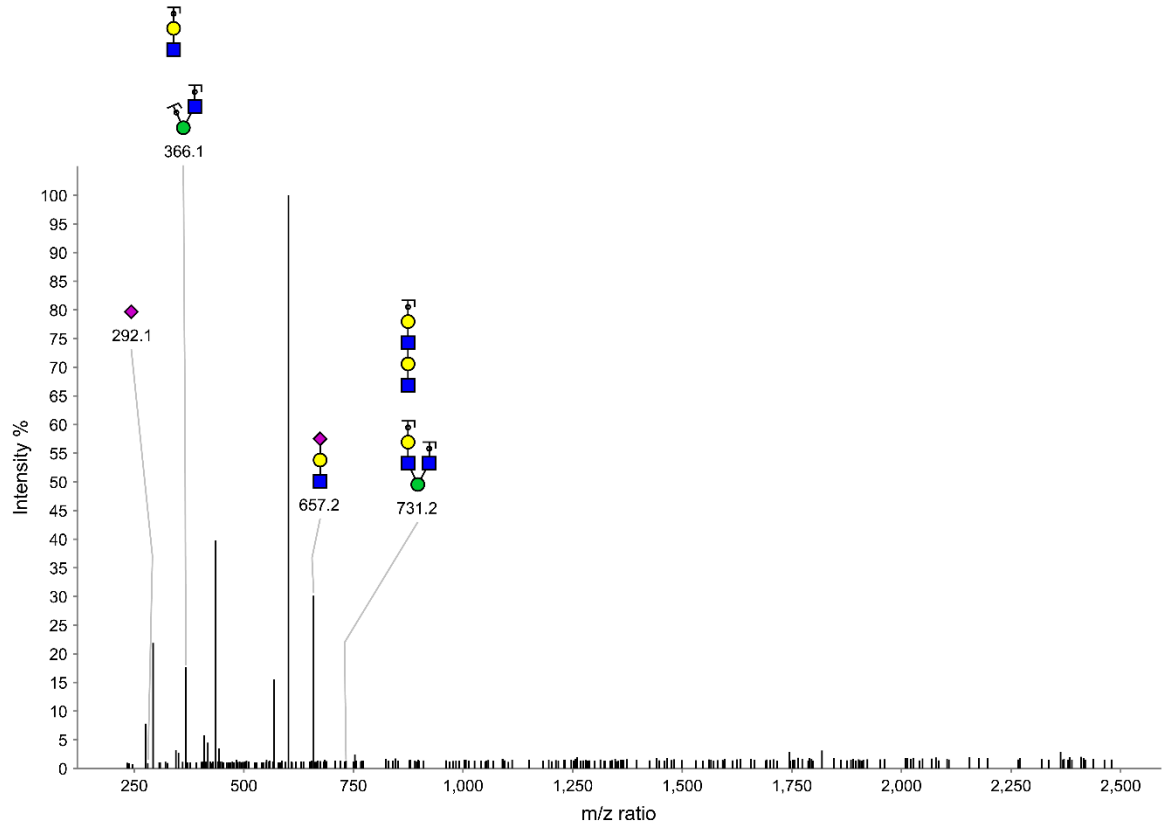

**CD16a N38 Peptide 1: KDSVTLKCQGAYSPEDNSTQW+IAM**

| Glycoform | Data set | Exact mass | Charge | Calculated mass | Observed mass | Retention time | Comment   |
|-----------|----------|------------|--------|-----------------|---------------|----------------|-----------|
| 8-9-1-4   | NK08     | 6806.6355  | 5      | 1362.3341       | 1362.3336     | 37.1 to 45.6   | Annotated |

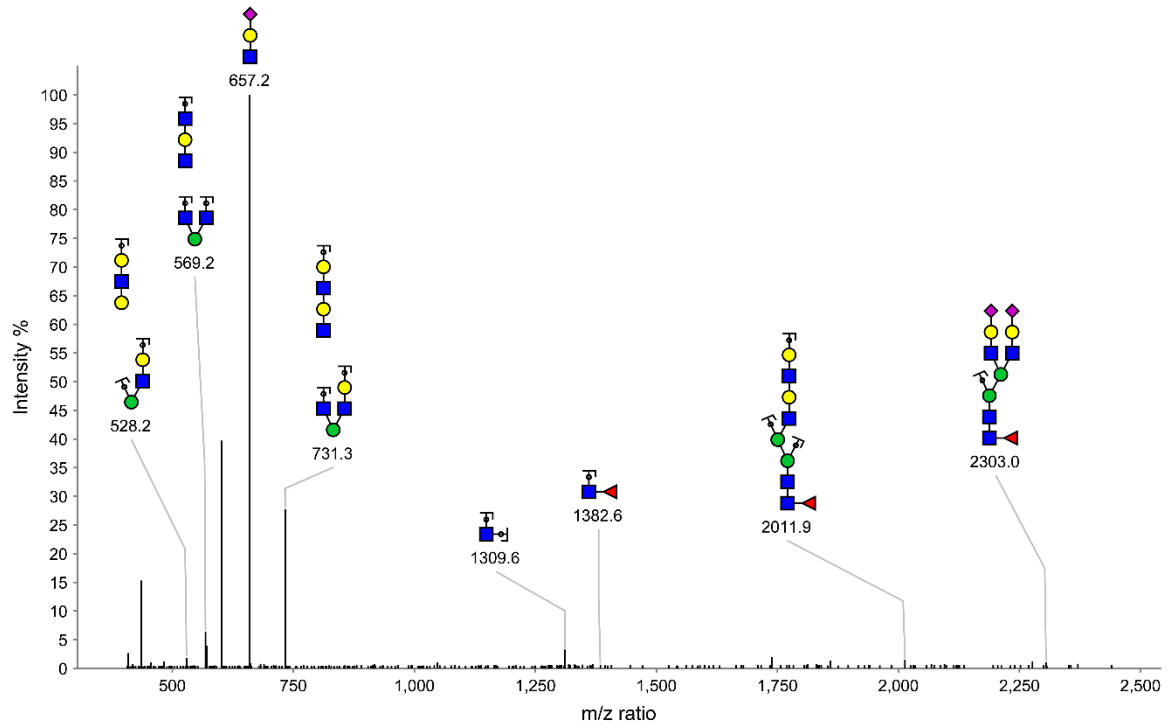

**CD16a N38 Peptide 1: KDSVTLKCQGAYSPEDNSTQW+IAM**

| Glycoform | Data set | Exact mass | Charge | Calculated mass | Observed mass | Retention time | Comment   |
|-----------|----------|------------|--------|-----------------|---------------|----------------|-----------|
| 9-10-1-4  | NK08     | 7171.7677  | 5      | 1435.3605       | 1435.3555     | 39.0 to 43.8   | Annotated |

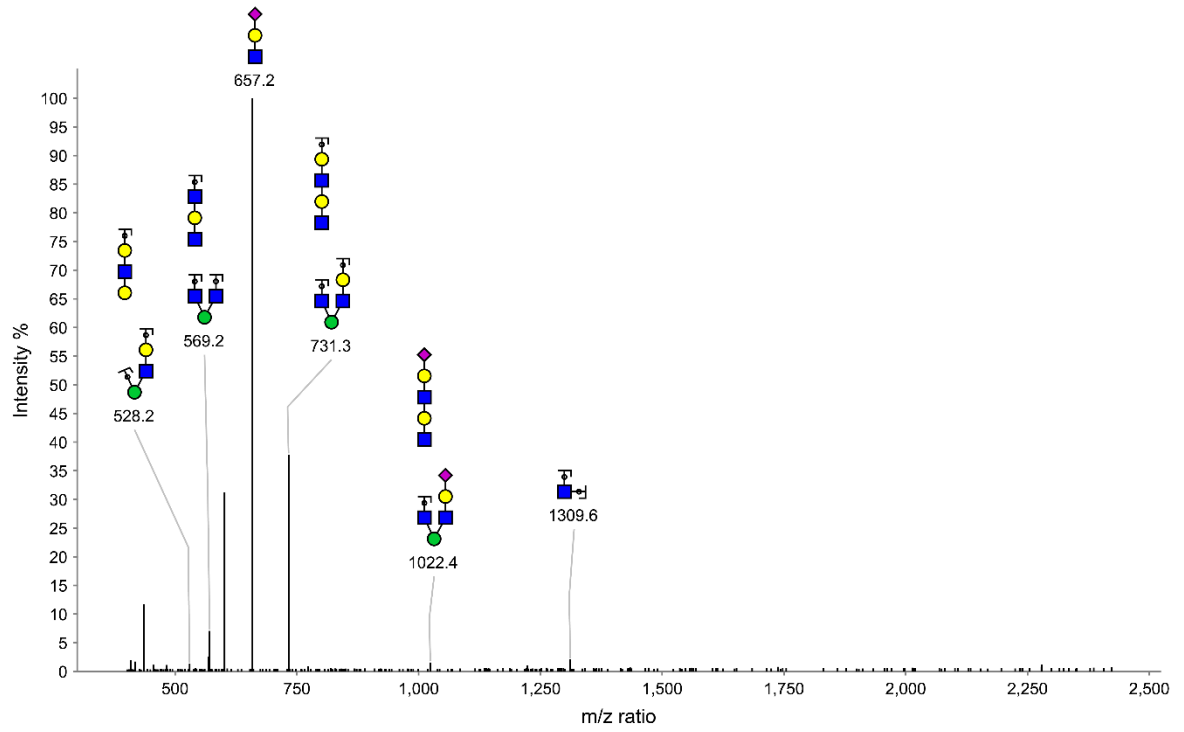

**CD16a N38 Peptide 1: KDSVTLKCQGAYSPEDNSTQW+IAM**

| Glycoform | Data set | Exact mass | Charge | Calculated mass | Observed mass | Retention time | Comment                     |
|-----------|----------|------------|--------|-----------------|---------------|----------------|-----------------------------|
| 10-11-1-3 | NK08     | 7245.8045  | 4      | 1812.4581       | 1812.4513     | 44.7 to 46.7   | No MS2                      |
| 10-11-1-4 | NK08     | 7536.8999  | 5      | 1508.3870       | 1508.3742     | 38.3 to 39.3   | Peptide+GlcNAc not detected |
| 10-11-1-4 | NK09     | 7536.8999  | 5      | 1508.3870       | 1508.3835     | 36.8 to 38.0   | Peptide+GlcNAc not detected |
| 10-11-1-4 | NK13     | 7536.8999  | 5      | 1508.3870       | 1508.588*     | 49.6 to 51.5   | Peptide+GlcNAc not detected |
| 10-11-3-3 | NK08     | 7537.9203  | 4      | 1885.4871       | 1885.4881     | 40.1 to 41.5   | No MS2                      |
| 11-12-1-2 | NK09     | 7319.8413  | 5      | 1464.9753       | 1464.9593     | 36.5 to 37.8   | No MS2                      |
| 11-12-1-4 | NK13     | 7902.0321  | 5      | 1581.4134       | 1581.6115*    | 41.1 to 41.7   | Peptide+GlcNAc not detected |
| 11-12-1-4 | NK09     | 7902.0321  | 5      | 1581.4134       | 1581.4218     | 35.8 to 36.8   | No MS2                      |
| 6-7-1-4   | NK13     | 6076.3711  | 5      | 1216.2812       | 1216.2907     | 45.7 to 46.5   | Peptide+GlcNAc not detected |
| 7-8-0-4   | NK09     | 6295.4454  | 4      | 1574.8684       | 1574.8649     | 37.9 to 39.5   | Peptide+GlcNAc not detected |
| 7-8-1-3   | NK08     | 6150.4079  | 4      | 1538.6090       | 1538.6026     | 47.0 to 47.8   | Peptide+GlcNAc not detected |
| 7-8-1-4   | NK13     | 6441.5033  | 4      | 1611.3828       | 1611.3966     | 44.0 to 44.9   | Peptide+GlcNAc not detected |
| 8-9-2-4   | NK08     | 6952.6934  | 4      | 1739.1804       | 1739.1730     | 40.9 to 43.2   | Peptide+GlcNAc not detected |
| 9-10-1-2  | NK08     | 6589.5769  | 4      | 1648.4012       | 1648.3963     | 41.4 to 46.1   | Peptide+GlcNAc not detected |
| 9-10-1-3  | NK08     | 6880.6723  | 5      | 1377.1415       | 1377.1285     | 40.6 to 44.4   | Peptide+GlcNAc not detected |
| 9-10-2-3  | NK08     | 7026.7302  | 5      | 1406.3530       | 1406.5532*    | 42.5 to 47.7   | Peptide+GlcNAc not detected |

**CD16a N38 Peptide 1: KDSVTLKCQGAYSPEDNSTQW+IAM**

| Glycoform | Data set | Exact mass | Charge | Calculated mass | Observed mass | Retention time | Comment   |
|-----------|----------|------------|--------|-----------------|---------------|----------------|-----------|
| 7-8-1-4   | NK13     | 5798.1492  | 4      | 1450.5443       | 1450.5539     | 41.2 to 42.8   | Annotated |

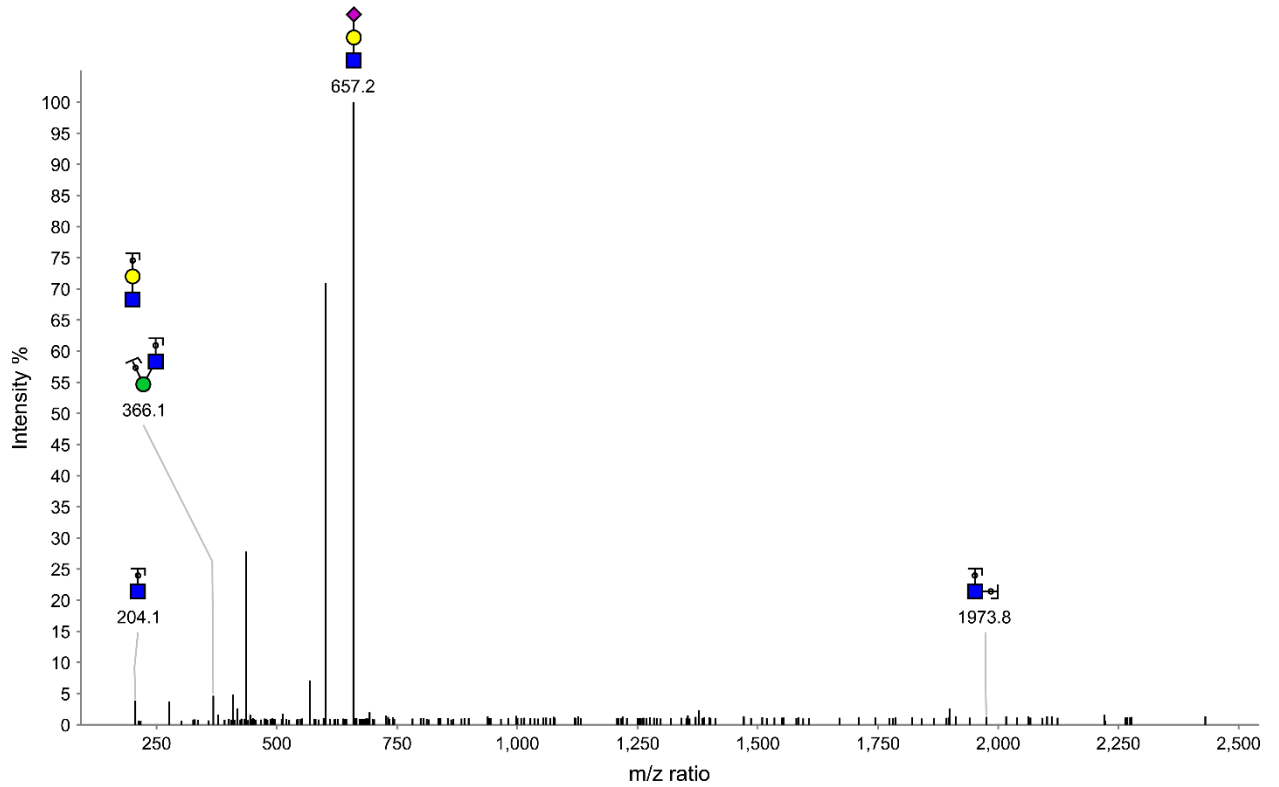

**CD16a N38 Peptide 2: KCQGAYSPEDNSTQW+IAM**

| Glycoform | Data set | Exact mass | Charge | Calculated mass | Observed mass | Retention time | Comment   |
|-----------|----------|------------|--------|-----------------|---------------|----------------|-----------|
| 9-10-1-4  | NK08     | 6528.4136  | 5      | 1306.6897       | 1306.6970     | 25.7 to 27.9   | Annotated |

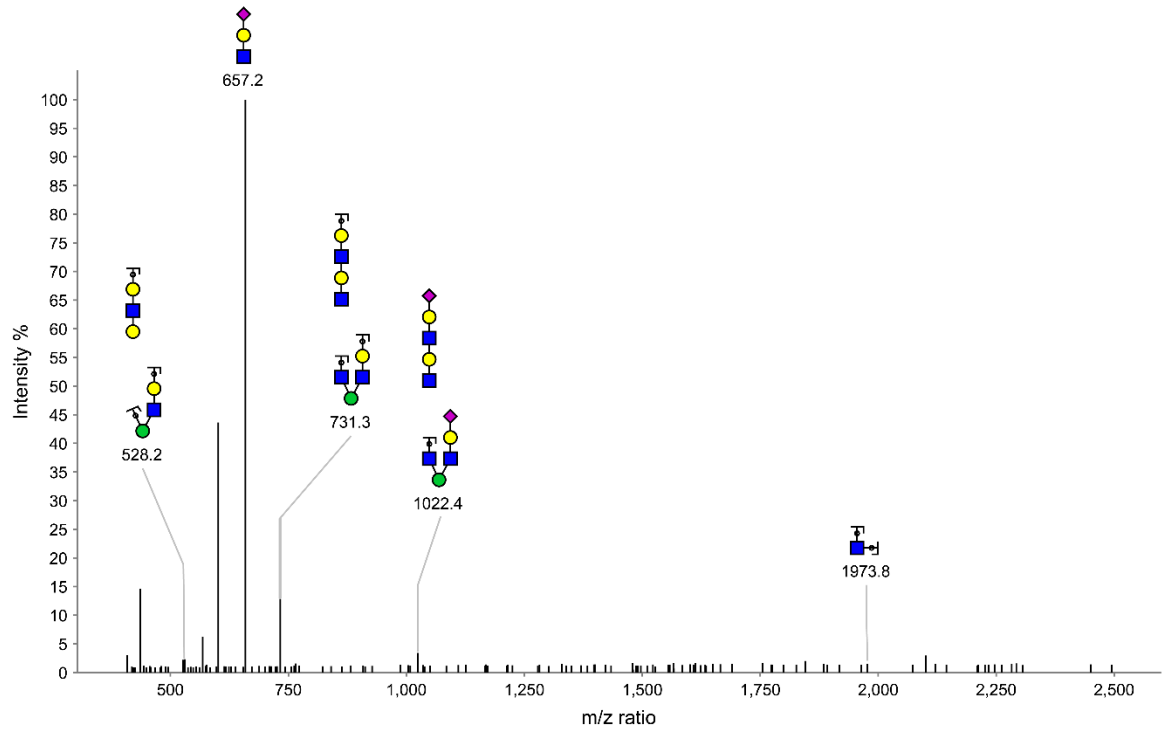

**CD16a N38 Peptide 2: KCQGAYSPEDNSTQW+IAM**

| Glycoform | Data set | Exact mass | Charge | Calculated mass | Observed mass | Retention time | Comment               |
|-----------|----------|------------|--------|-----------------|---------------|----------------|-----------------------|
| 8-9-1-4   | NK08     | 6163.2814  | 4      | 1541.8274       | 1541.8256     | 25.8 to 29.8   | Annotated (Figure S4) |

**CD16a N38 Peptide 2: KCQGAYSPEDNSTQW+IAM**



| Glycoform | Data set | Exact mass | Charge | Calculated mass | Observed mass | Retention time | Comment                     |
|-----------|----------|------------|--------|-----------------|---------------|----------------|-----------------------------|
| 10-11-1-2 | NK13     | 6311.355   | 4      | 1578.8458       | 1578.8439     | 40.2 to 41.9   | Peptide+GlcNAc not detected |
| 10-11-1-4 | NK08     | 6893.5458  | 5      | 1379.7162       | 1379.7124     | 25.0 to 25.9   | Peptide+GlcNAc not detected |
| 10-11-1-4 | NK13     | 6893.5458  | 5      | 1379.7162       | 1379.9198*    | 25.2 to 26.4   | Peptide+GlcNAc not detected |
| 10-11-1-4 | NK13     | 6893.5458  | 4      | 1724.3935       | 1724.3922     | 38.4 to 39.5   | Peptide+GlcNAc not detected |
| 11-12-1-2 | NK13     | 6676.4872  | 4      | 1670.1288       | 1670.1206     | 38.8 to 41.9   | Peptide+GlcNAc not detected |
| 11-12-1-4 | NK13     | 7258.678   | 4      | 1815.6765       | 1815.6807     | 37.8 to 38.7   | Peptide+GlcNAc not detected |
| 6-7-1-4   | NK08     | 5433.017   | 4      | 1359.2613       | 1359.2612     | 28.2 to 31.1   | Peptide+GlcNAc not detected |
| 7-8-0-4   | NK13     | 5652.0913  | 4      | 1414.0298       | 1414.2882*    | 37.9 to 38.9   | Peptide+GlcNAc not detected |
| 7-8-1-3   | NK13     | 5507.0538  | 4      | 1377.7705       | 1377.7898     | 37.8 to 38.7   | Peptide+GlcNAc not detected |
| 7-8-1-4   | NK08     | 5798.1492  | 4      | 1450.5443       | 1450.5469     | 27.2 to 29.2   | Peptide+GlcNAc not detected |
| 8-9-1-3   | NK08     | 5872.186   | 4      | 1469.0535       | 1469.0496     | 21.8 to 23.1   | Peptide+GlcNAc not detected |
| 8-9-1-3   | NK13     | 5872.186   | 4      | 1469.0535       | 1469.0536     | 37.5 to 37.8   | Peptide+GlcNAc not detected |
| 8-9-1-4   | NK13     | 6163.2814  | 4      | 1541.8274       | 1541.8244     | 40.5 to 42.5   | Peptide+GlcNAc not detected |
| 8-9-2-3   | NK13     | 6018.2439  | 4      | 1505.5680       | 1505.8166*    | 47.3 to 48.7   | Peptide+GlcNAc not detected |
| 8-9-2-4   | NK13     | 6309.3393  | 4      | 1578.3418       | 1578.3284     | 40.1 to 41.9   | Peptide+GlcNAc not detected |
| 9-10-1-3  | NK13     | 6237.3182  | 4      | 1560.3366       | 1560.3404     | 36.5 to 37.1   | Peptide+GlcNAc not detected |
| 9-10-2-4  | NK13     | 6674.4715  | 4      | 1669.6249       | 1669.8696*    | 39.4 to 39.9   | Peptide+GlcNAc not detected |
| 10-11-1-3 | NK13     | 6602.4504  | 4      | 1651.6196       | 1651.6249     | 35.7 to 36.3   | No MS2                      |
| 10-11-2-4 | NK13     | 7039.6037  | 4      | 1760.9079       | 1760.8963     | 37.9 to 40.3   | No MS2                      |
| 7-8-1-3   | NK08     | 5507.0538  | 4      | 1377.7705       | 1377.7779     | 22.5 to 24.4   | No MS2                      |
| 7-8-2-4   | NK13     | 5944.2071  | 4      | 1487.0588       | 1487.0783     | 41.5 to 41.9   | No MS2                      |
| 8-9-0-4   | NK08     | 6017.2235  | 4      | 1505.3129       | 1505.3060     | 27.6 to 28.5   | No MS2                      |
| 8-9-2-4   | NK08     | 6309.3393  | 4      | 1578.3418       | 1578.3265     | 27.7 to 28.8   | No MS2                      |
| 9-10-1-4  | NK13     | 6528.4136  | 4      | 1633.1104       | 1633.1101     | 39.6 to 40.2   | No MS2                      |

**CD16a N38 Peptide 2: KCQGAYSPEDNSTQW+IAM**

| Glycoform | Data set | Exact mass | Charge | Calculated mass | Observed mass | Retention time | Comment       |
|-----------|----------|------------|--------|-----------------|---------------|----------------|---------------|
| 2-5-0-0   | NK08     | 1761.6462  | 2      | 881.8301        | 881.8315      | 30.1 to 37.6   | Not Annotated |
| 2-5-0-0   | NK11     | 1761.6462  | 2      | 881.8301        | 881.8303      | 33.6 to 37.6   | Annotated     |

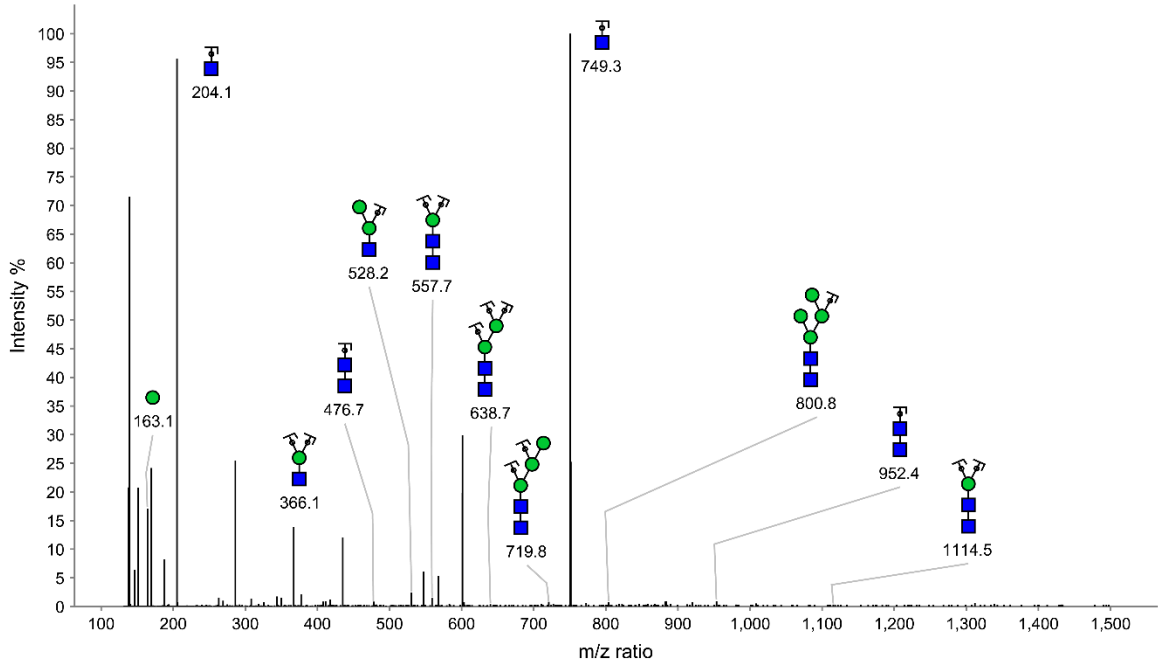

**CD16a N45 Peptide 1: FHNE**

| Glycoform | Data set | Exact mass | Charge | Calculated mass | Observed mass | Retention time | Comment       |
|-----------|----------|------------|--------|-----------------|---------------|----------------|---------------|
| 2-6-0-0   | NK08     | 1923.699   | 2      | 962.8565        | 962.8583      | 29.8 to 37.9   | Not Annotated |
| 2-6-0-0   | NK11     | 1923.699   | 2      | 962.8565        | 962.8571      | 32.7 to 36.9   | Annotated     |

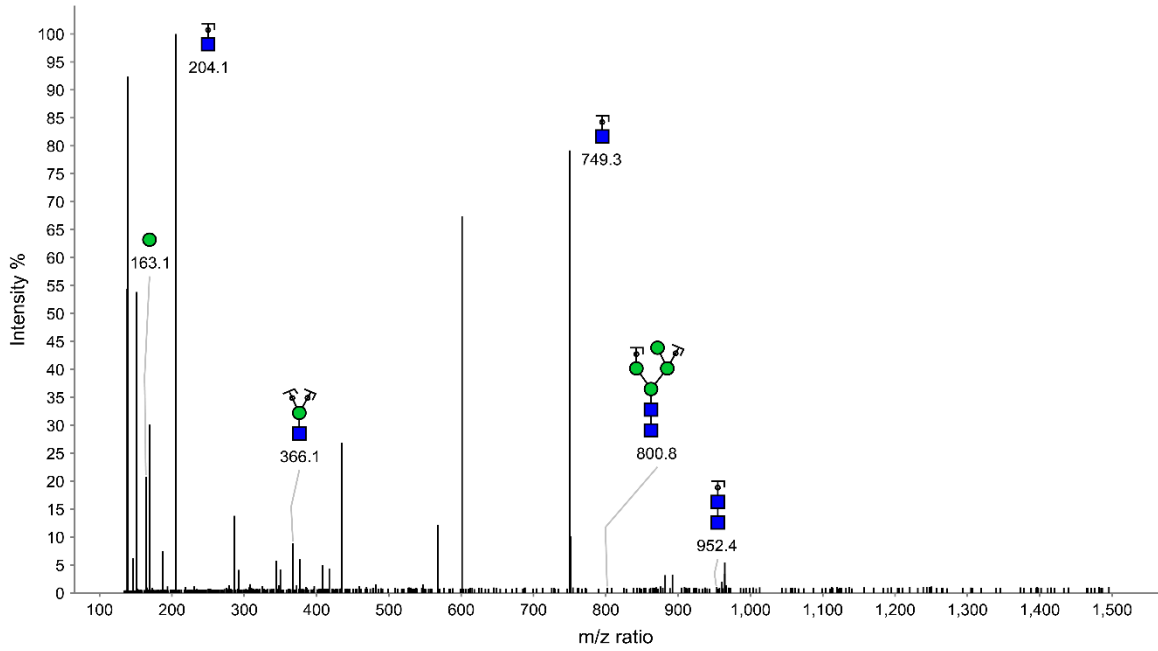

**CD16a N45 Peptide 1: FHNE**

| Glycoform | Data set | Exact mass | Charge | Calculated mass | Observed mass | Retention time | Comment   |
|-----------|----------|------------|--------|-----------------|---------------|----------------|-----------|
| 2-7-0-0   | NK11     | 2085.7518  | 2      | 1043.8829       | 1043.8846     | 31.7 to 37.7   | Annotated |

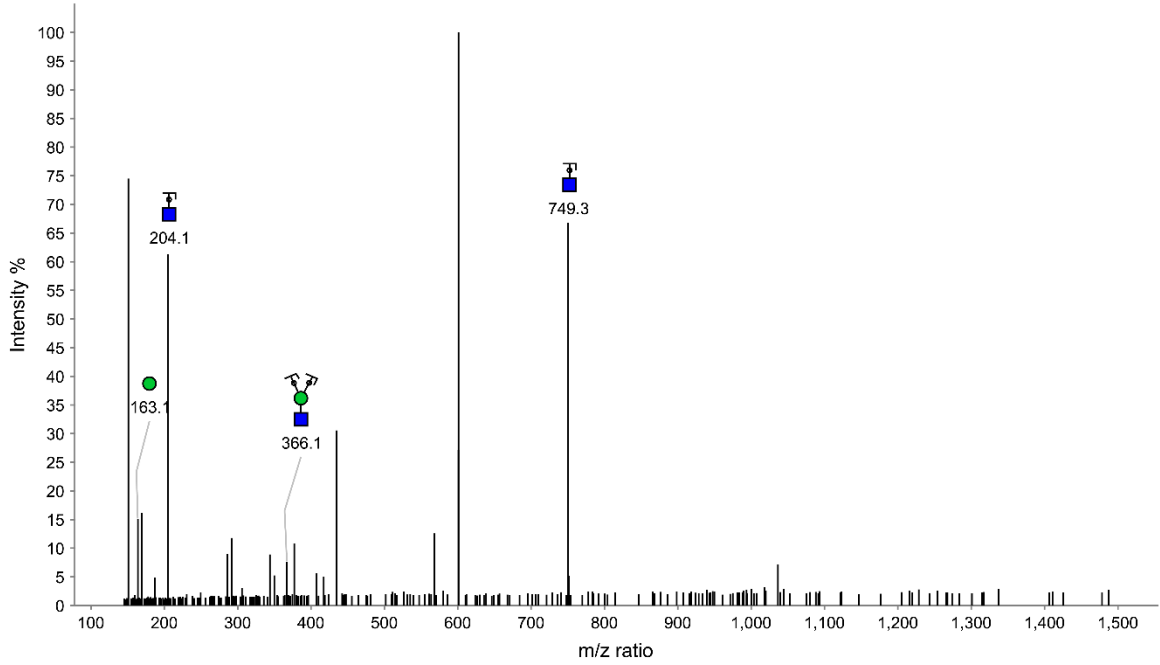

**CD16a N45 Peptide 1: FHNE**

| Glycoform | Data set | Exact mass | Charge | Calculated mass | Observed mass | Retention time | Comment   |
|-----------|----------|------------|--------|-----------------|---------------|----------------|-----------|
| 2-8-0-0   | NK11     | 2247.8046  | 2      | 1124.9093       | 1124.9103     | 31.3 to 38.1   | Annotated |

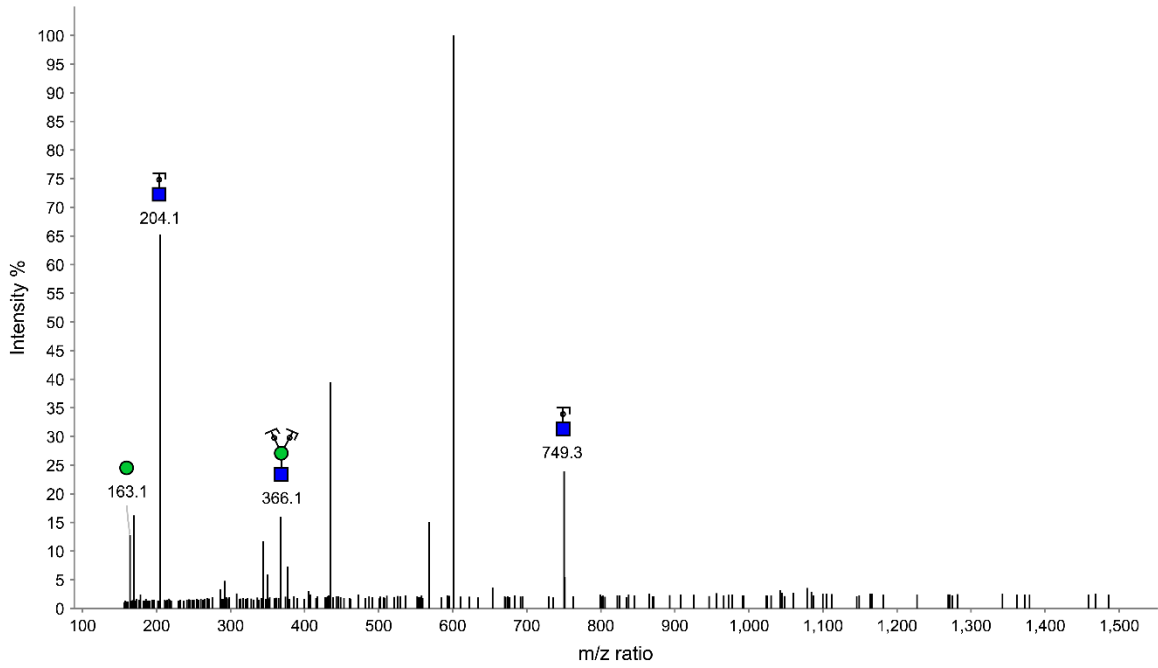

**CD16a N45 Peptide 1: FHNE**

| Glycoform | Data set | Exact mass | Charge | Calculated mass | Observed mass | Retention time | Comment       |
|-----------|----------|------------|--------|-----------------|---------------|----------------|---------------|
| 2-9-0-0   | NK08     | 2409.8574  | 2      | 1205.9357       | 1205.9401     | 27.6 to 37.5   | Not Annotated |
| 2-9-0-0   | NK11     | 2409.8574  | 2      | 1205.9357       | 1205.9369     | 31.0 to 37.0   | Annotated     |

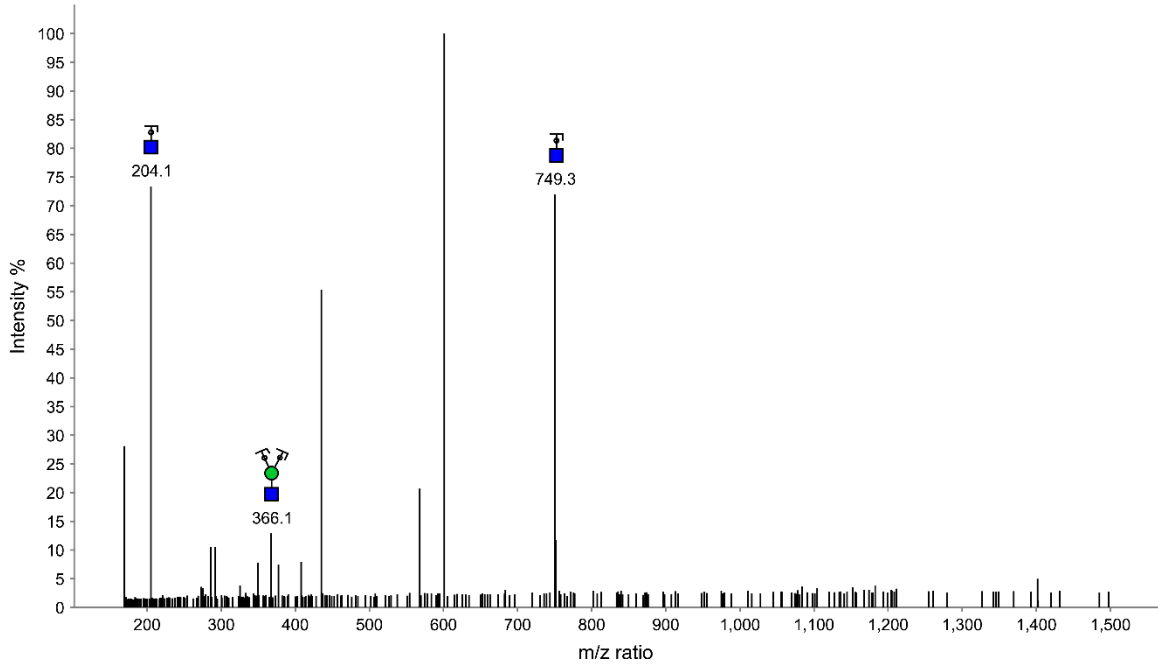

**CD16a N45 Peptide 1: FHNE**

| Glycoform | Data set | Exact mass | Charge | Calculated mass | Observed mass | Retention time | Comment       |
|-----------|----------|------------|--------|-----------------|---------------|----------------|---------------|
| 3-4-0-1   | NK08     | 2093.7682  | 2      | 1047.8911       | 1047.8904     | 6.8 to 24.7    | Not Annotated |
| 3-4-0-1   | NK11     | 2093.7682  | 2      | 1047.8911       | 1047.8921     | 4.4 to 33.6    | Annotated     |

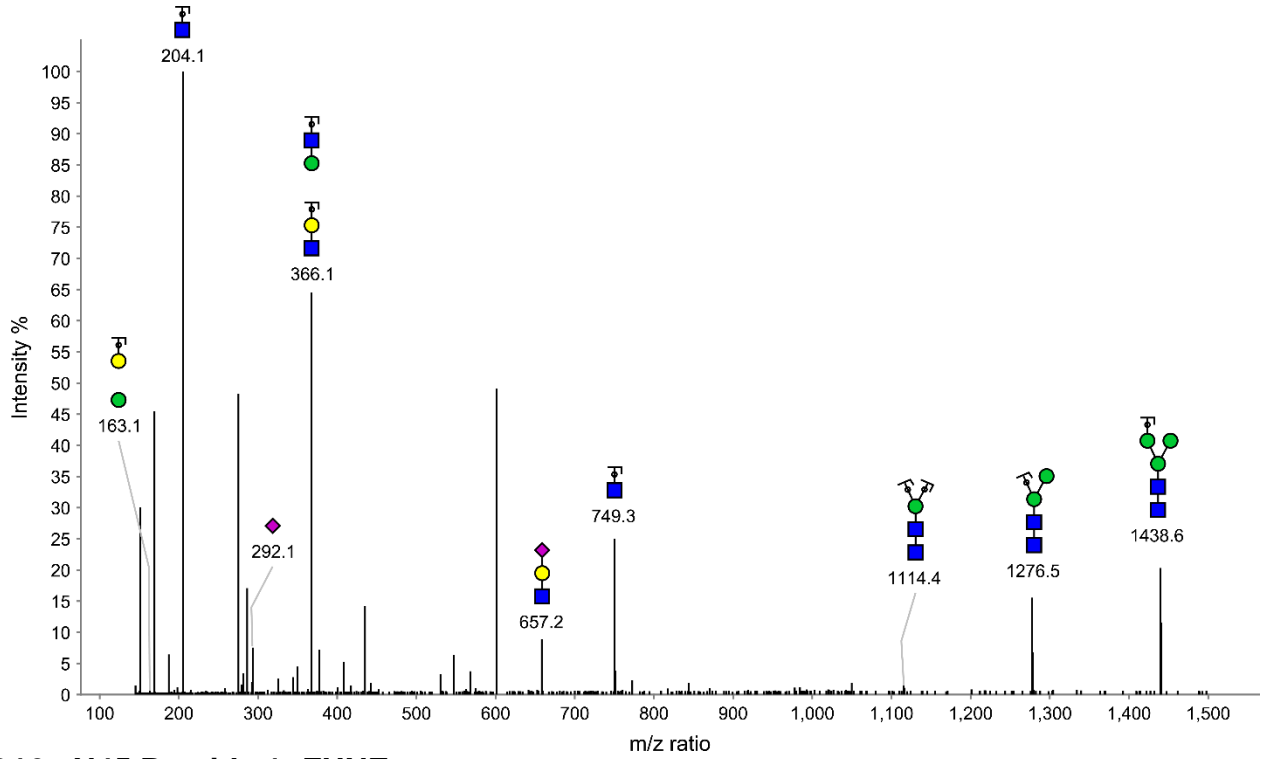

**CD16a N45 Peptide 1: FHNE**

| Glycoform | Data set | Exact mass | Charge | Calculated mass | Observed mass | Retention time | Comment   |
|-----------|----------|------------|--------|-----------------|---------------|----------------|-----------|
| 3-4-1-0   | NK11     | 1948.7307  | 2      | 975.3724        | 975.3723      | 33.7 to 35.3   | Annotated |

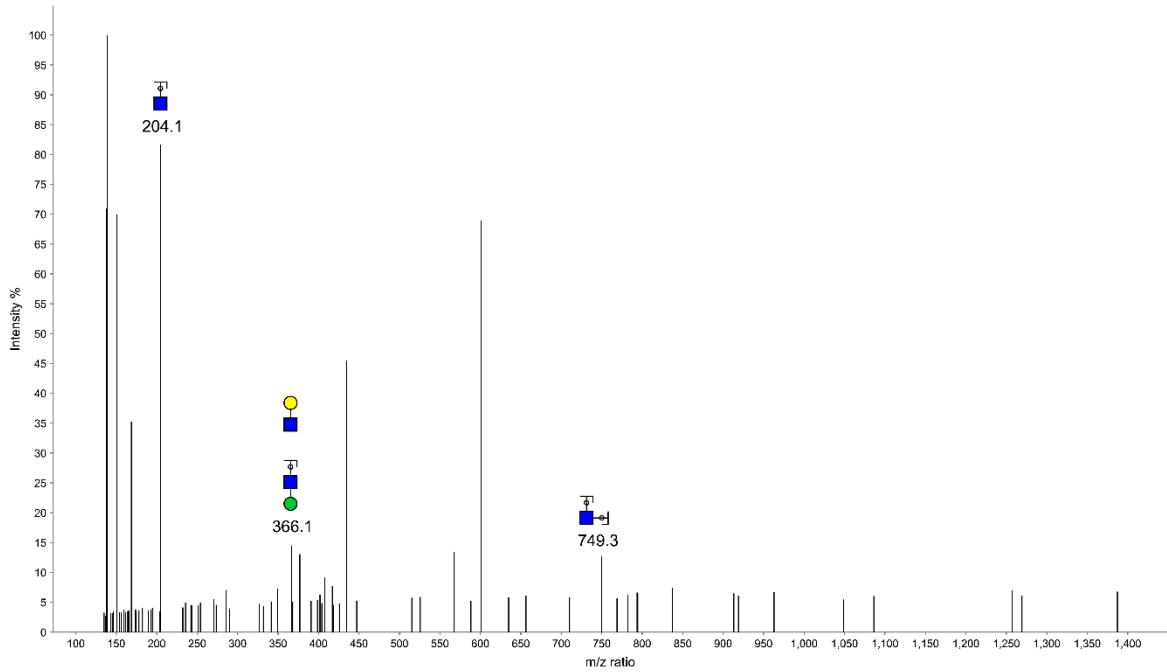

### CD16a N45 Peptide 1: FHNE



| Glycoform | Data set | Exact mass | Charge | Calculated mass | Observed mass | Retention time | Comment   |
|-----------|----------|------------|--------|-----------------|---------------|----------------|-----------|
| 3-4-1-1   | NK11     | 2239.8261  | 2      | 1120.9201       | 1120.9206     | 12.5 to 31.6   | Annotated |

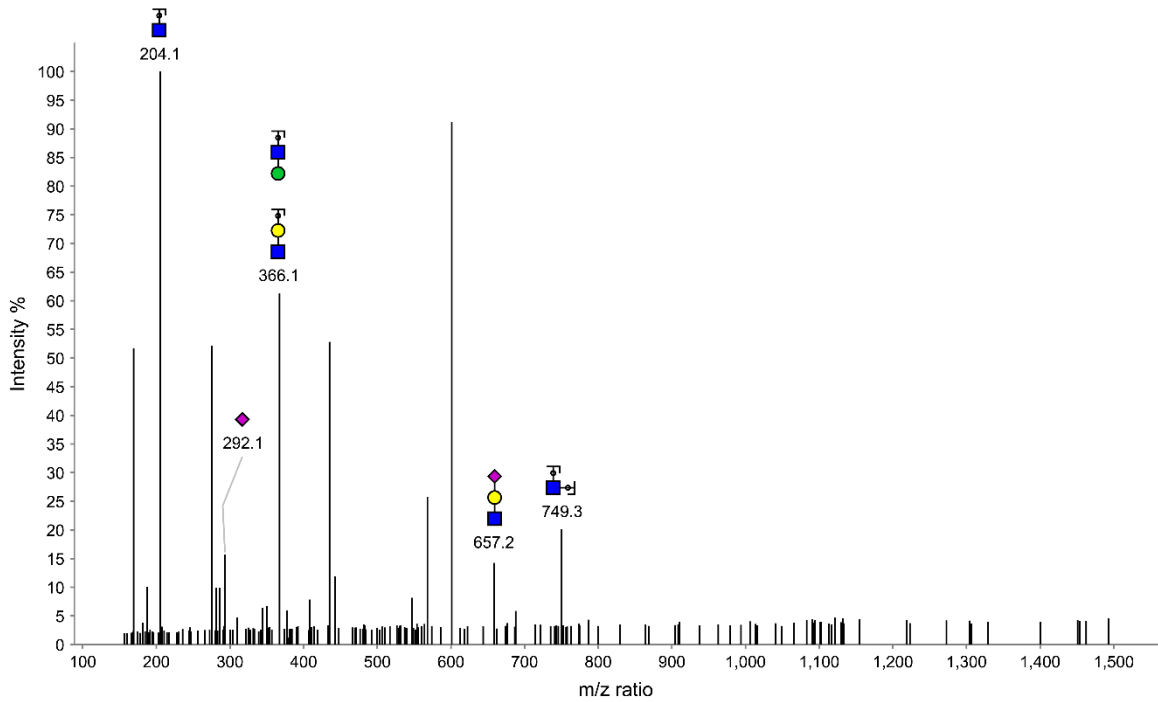

**CD16a N45 Peptide 1: FHNE**

| Glycoform | Data set | Exact mass | Charge | Calculated mass | Observed mass | Retention time | Comment   |
|-----------|----------|------------|--------|-----------------|---------------|----------------|-----------|
| 3-5-0-0   | NK11     | 1964.7256  | 2      | 983.3698        | 983.3717      | 32.9 to 36.2   | Annotated |

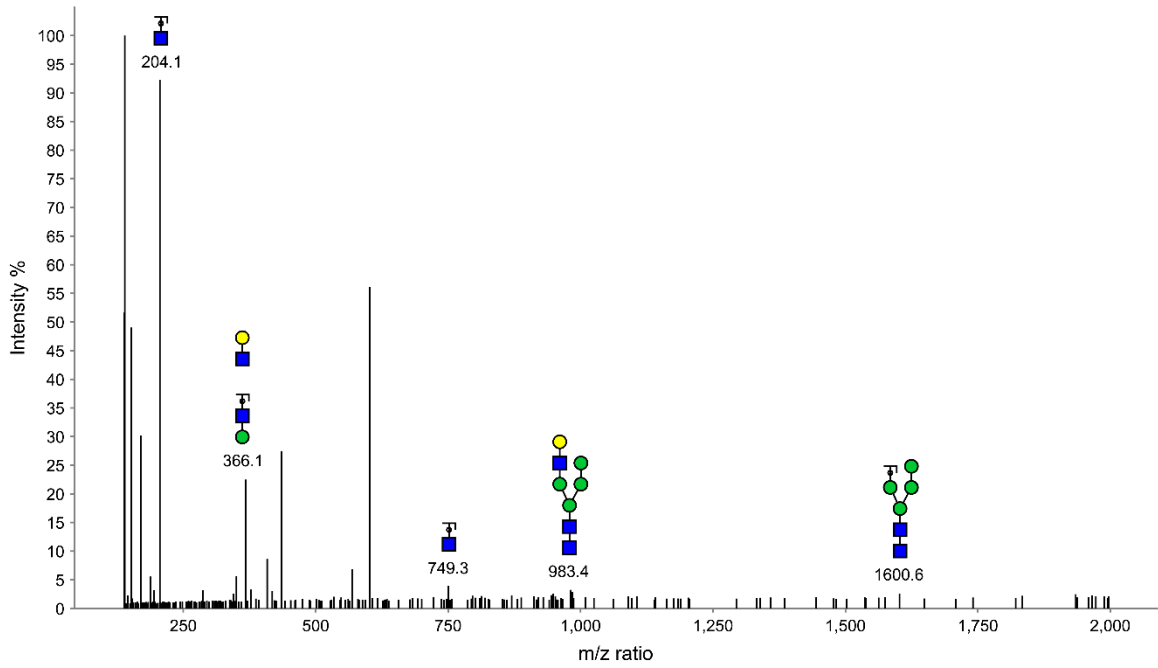

**CD16a N45 Peptide 1: FHNE**

| Glycoform | Data set | Exact mass | Charge | Calculated mass | Observed mass | Retention time | Comment       |
|-----------|----------|------------|--------|-----------------|---------------|----------------|---------------|
| 3-5-0-1   | NK11     | 2255.821   | 2      | 1128.9175       | 1128.9185     | 4.2 to 34.8    | Annotated     |
| 3-5-0-1   | NK08     | 2255.821   | 2      | 1128.9175       | 1128.9190     | 6.2 to 34.4    | Not Annotated |

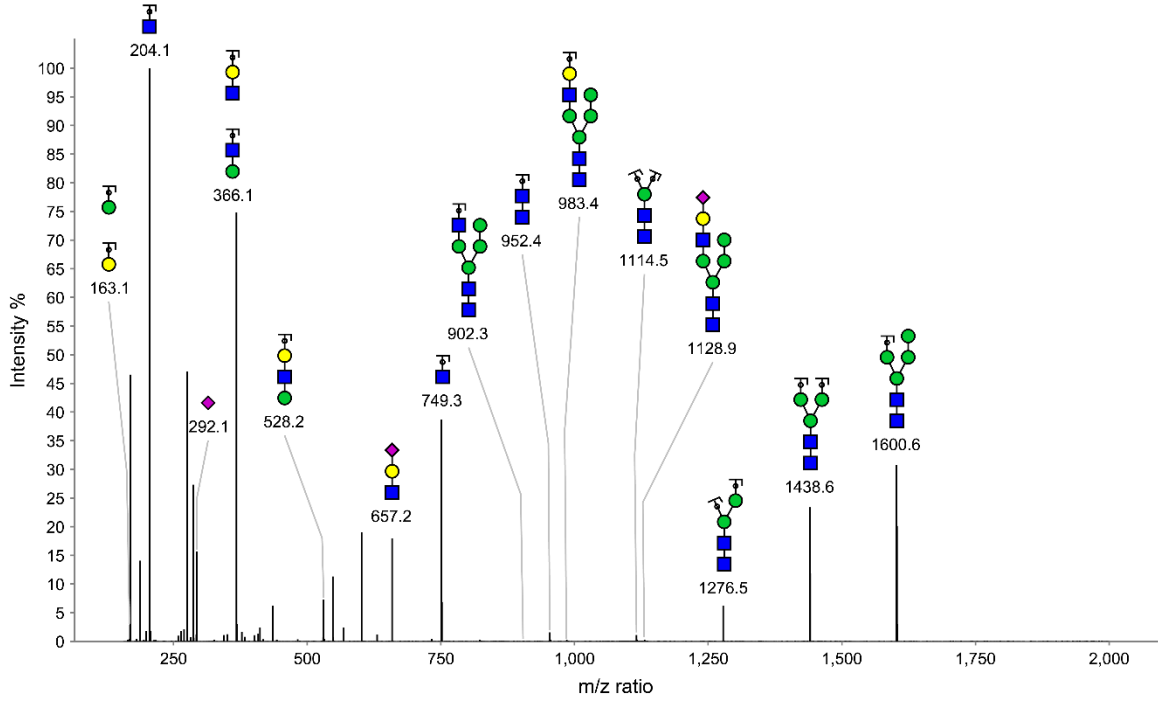

### CD16a N45 Peptide 1: FHNE

| Glycoform | Data set | Exact mass | Charge | Calculated mass | Observed mass | Retention time | Comment       |
|-----------|----------|------------|--------|-----------------|---------------|----------------|---------------|
| 3-5-1-1   | NK11     | 2401.8789  | 2      | 1201.9465       | 1201.9475     | 7.3 to 33.8    | Annotated     |
| 3-5-1-1   | NK08     | 2401.8789  | 2      | 1201.9465       | 1201.9483     | 7.4 to 31.5    | Not Annotated |

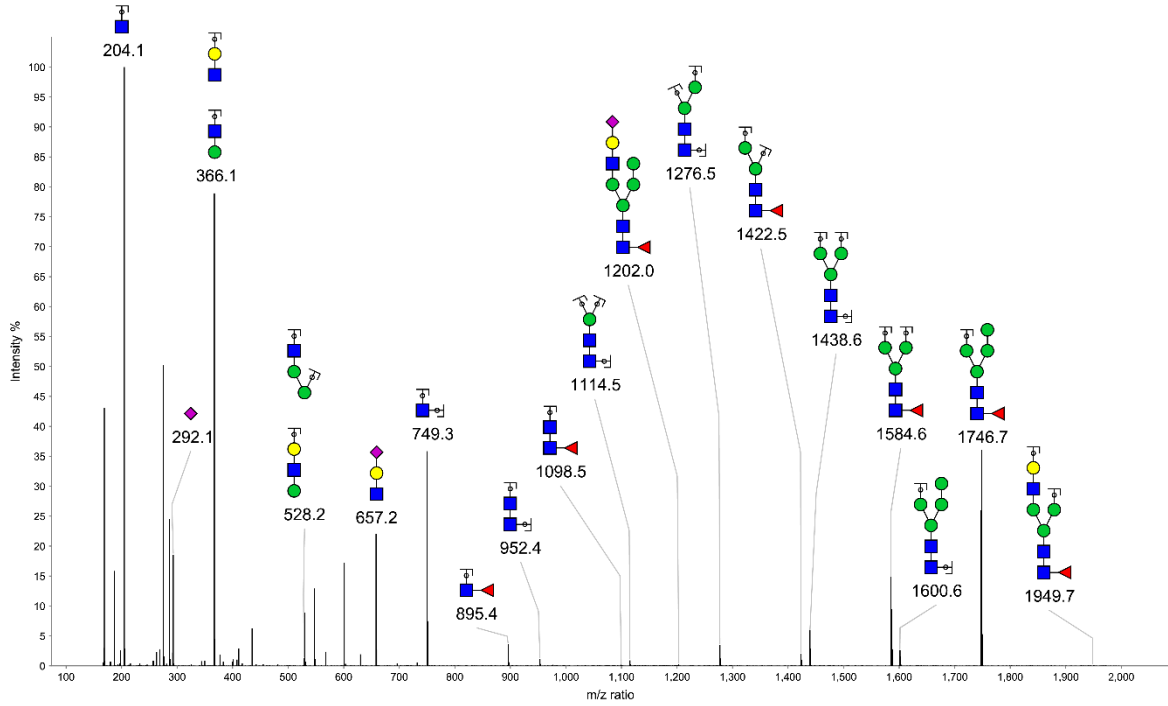

**CD16a N45 Peptide 1: FHNE**

| Glycoform | Data set | Exact mass | Charge | Calculated mass | Observed mass | Retention time | Comment                     |
|-----------|----------|------------|--------|-----------------|---------------|----------------|-----------------------------|
| 3-6-0-1   | NK11     | 2417.8738  | 2      | 1209.9439       | 1209.9454     | 4.2 to 34.1    | Peptide+GlcNAc not detected |
| 3-6-0-1   | NK08     | 2417.8738  | 2      | 1209.9439       | 1209.9455     | 6.2 to 34.8    | Annotated                   |

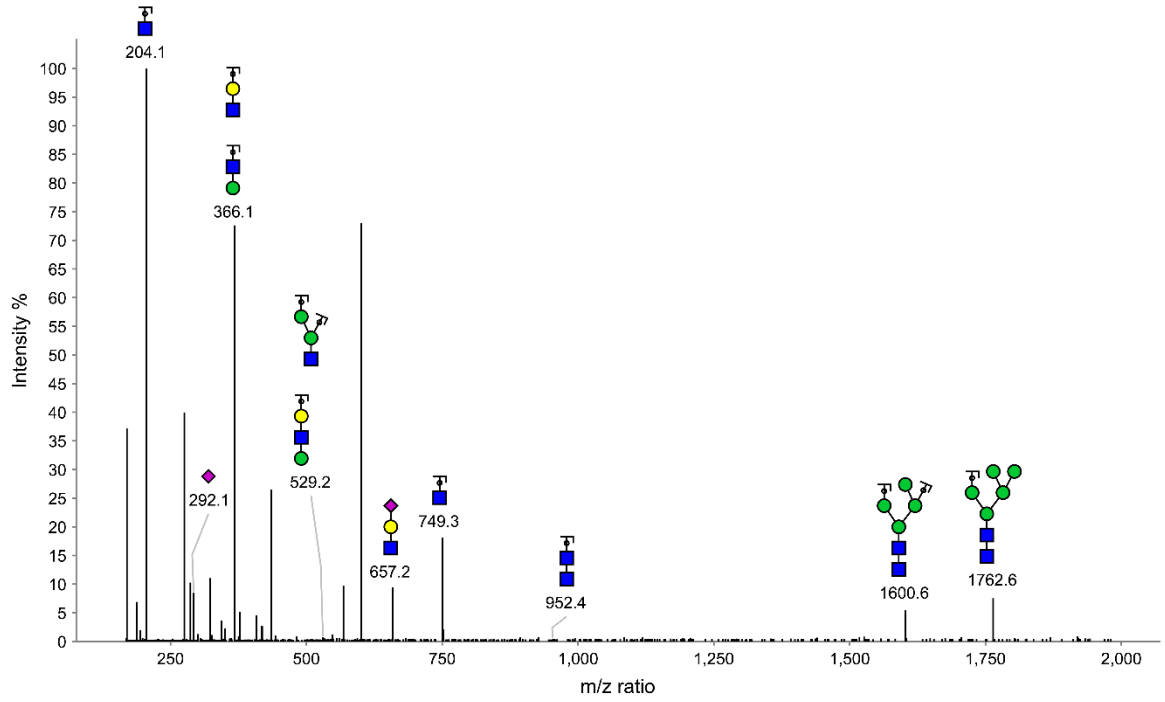

**CD16a N45 Peptide 1: FHNE**

| Glycoform | Data set | Exact mass | Charge | Calculated mass | Observed mass | Retention time | Comment       |
|-----------|----------|------------|--------|-----------------|---------------|----------------|---------------|
| 3-6-1-1   | NK08     | 2563.9317  | 2      | 1282.9729       | 1282.9756     | 7.0 to 32.5    | Not Annotated |
| 3-6-1-1   | NK11     | 2563.9317  | 2      | 1282.9729       | 1282.9736     | 9.0 to 31.0    | Annotated     |

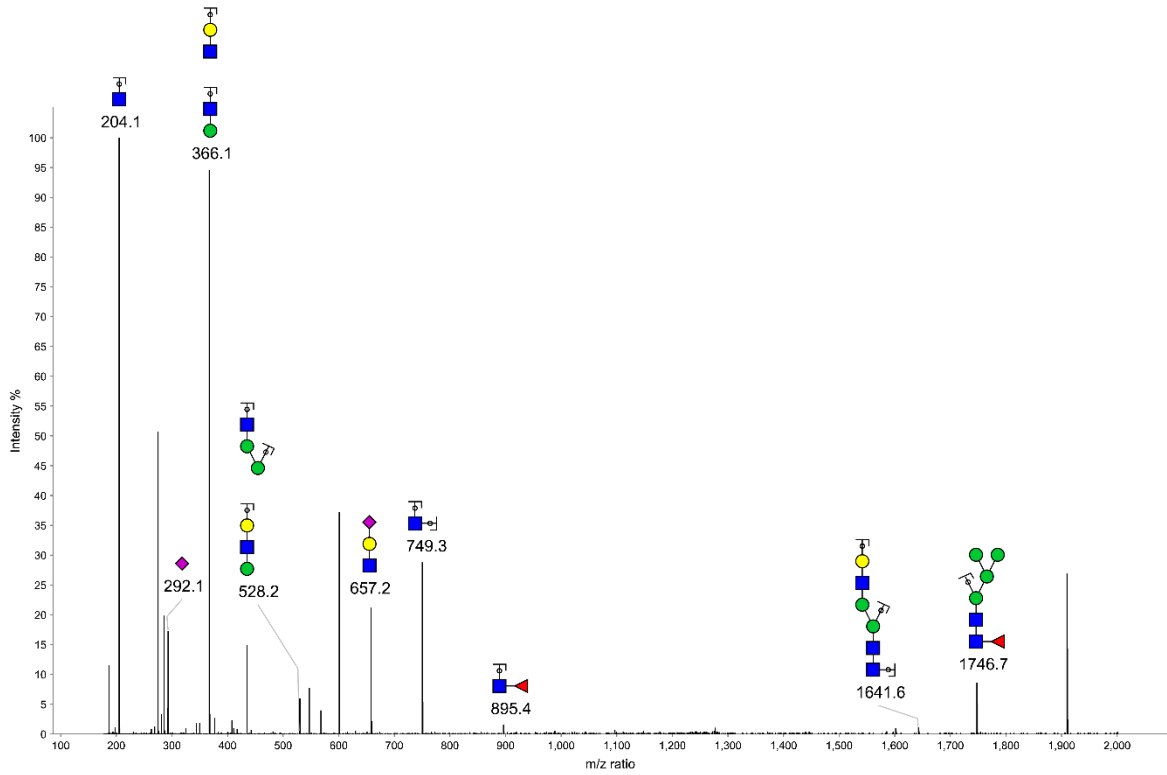

**CD16a N45 Peptide 1: FHNE**

| Glycoform | Data set | Exact mass | Charge | Calculated mass | Observed mass | Retention time | Comment       |
|-----------|----------|------------|--------|-----------------|---------------|----------------|---------------|
| 4-5-0-1   | NK11     | 2458.9004  | 2      | 1230.4572       | 1230.4584     | 10.1 to 30.6   | Annotated     |
| 4-5-0-1   | NK08     | 2458.9004  | 2      | 1230.4572       | 1230.4596     | 8.3 to 23.8    | Not Annotated |

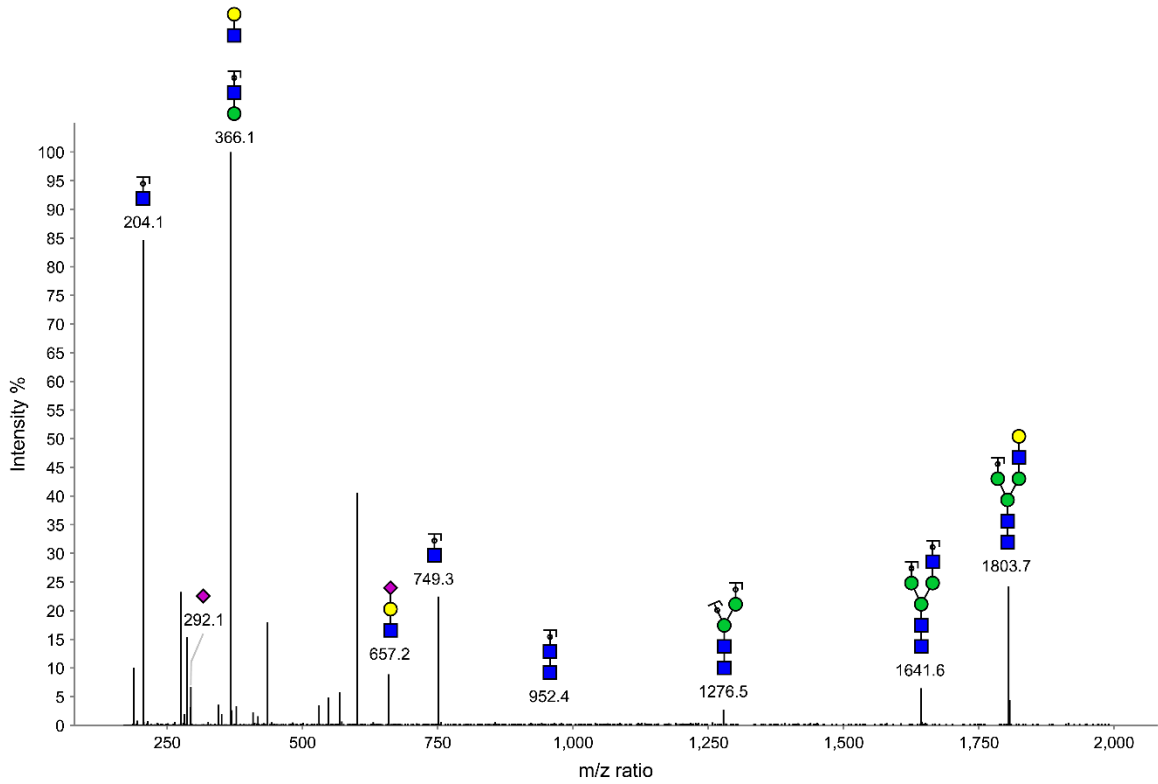

**CD16a N45 Peptide 1: FHNE**

| Glycoform | Data set | Exact mass | Charge | Calculated mass | Observed mass | Retention time | Comment       |
|-----------|----------|------------|--------|-----------------|---------------|----------------|---------------|
| 4-5-0-2   | NK11     | 2749.9958  | 2      | 1376.0049       | 1376.0001     | 9.4 to 12.3    | Not Annotated |
| 4-5-0-2   | NK08     | 2749.9958  | 3      | 917.6723        | 917.6734      | 9.4 to 16.5    | Annotated     |

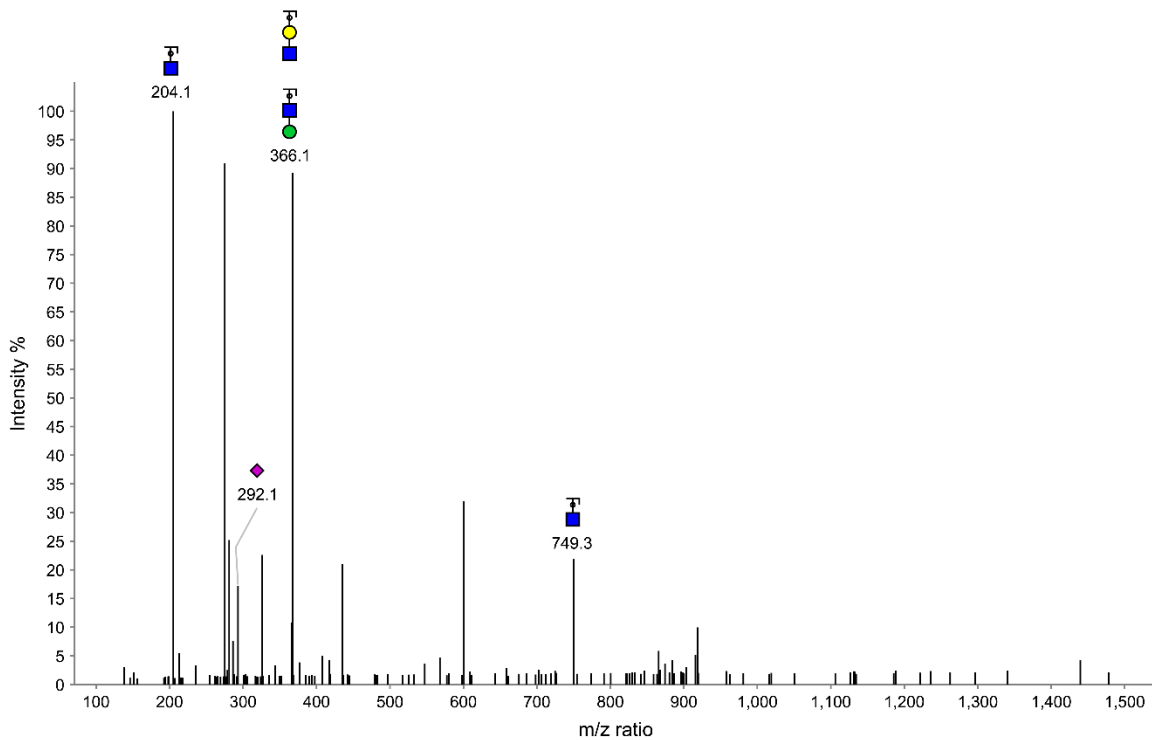

**CD16a N45 Peptide 1: FHNE**



| Glycoform | Data set | Exact mass | Charge | Calculated mass | Observed mass | Retention time | Comment                     |
|-----------|----------|------------|--------|-----------------|---------------|----------------|-----------------------------|
| 4-5-1-1   | NK11     | 2604.9583  | 2      | 1303.4862       | 1303.4873     | 12.8 to 28.2   | Annotated                   |
| 4-5-1-1   | NK08     | 2604.9583  | 3      | 869.3264        | 869.3284      | 13.8 to 25.8   | Peptide+GlcNAc not detected |

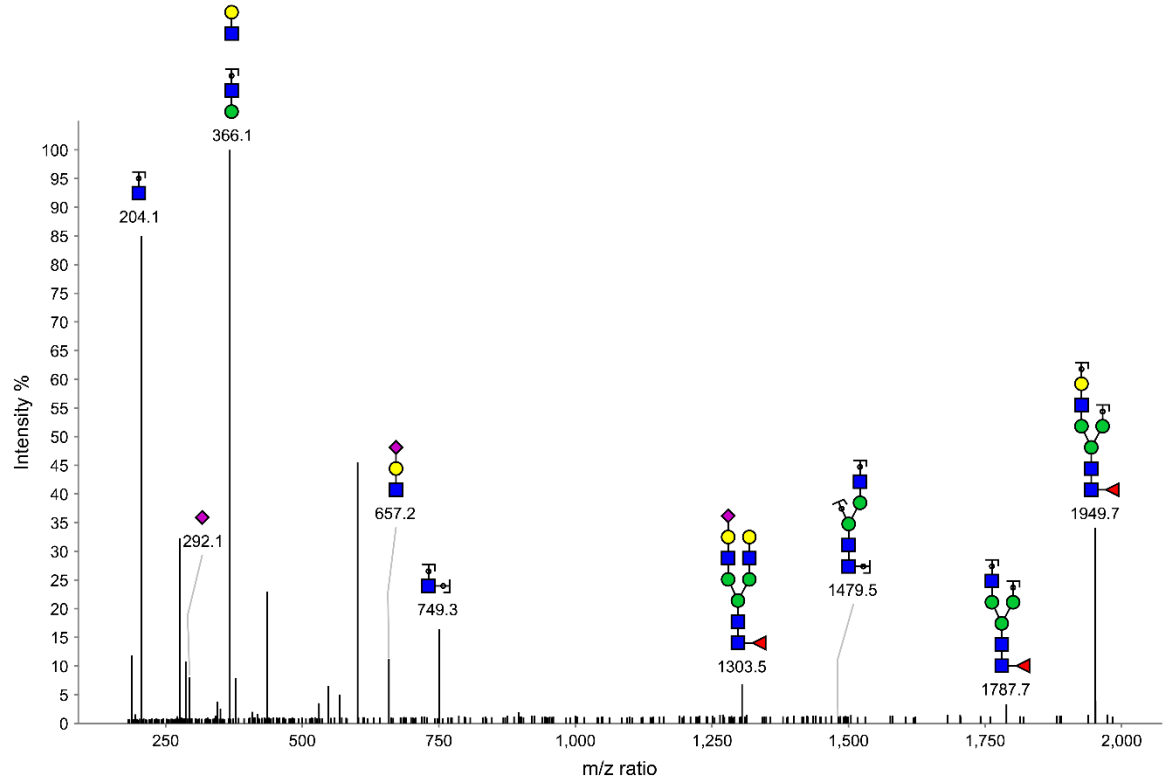

**CD16a N45 Peptide 1: FHNE**

| Glycoform | Data set | Exact mass | Charge | Calculated mass | Observed mass | Retention time | Comment                     |
|-----------|----------|------------|--------|-----------------|---------------|----------------|-----------------------------|
| 5-6-0-1   | NK11     | 2824.0326  | 3      | 942.3512        | 942.3535      | 10.8 to 31.5   | Annotated                   |
| 5-6-0-1   | NK08     | 2824.0326  | 3      | 942.3512        | 942.3539      | 9.9 to 16.2    | Peptide+GlcNAc not detected |

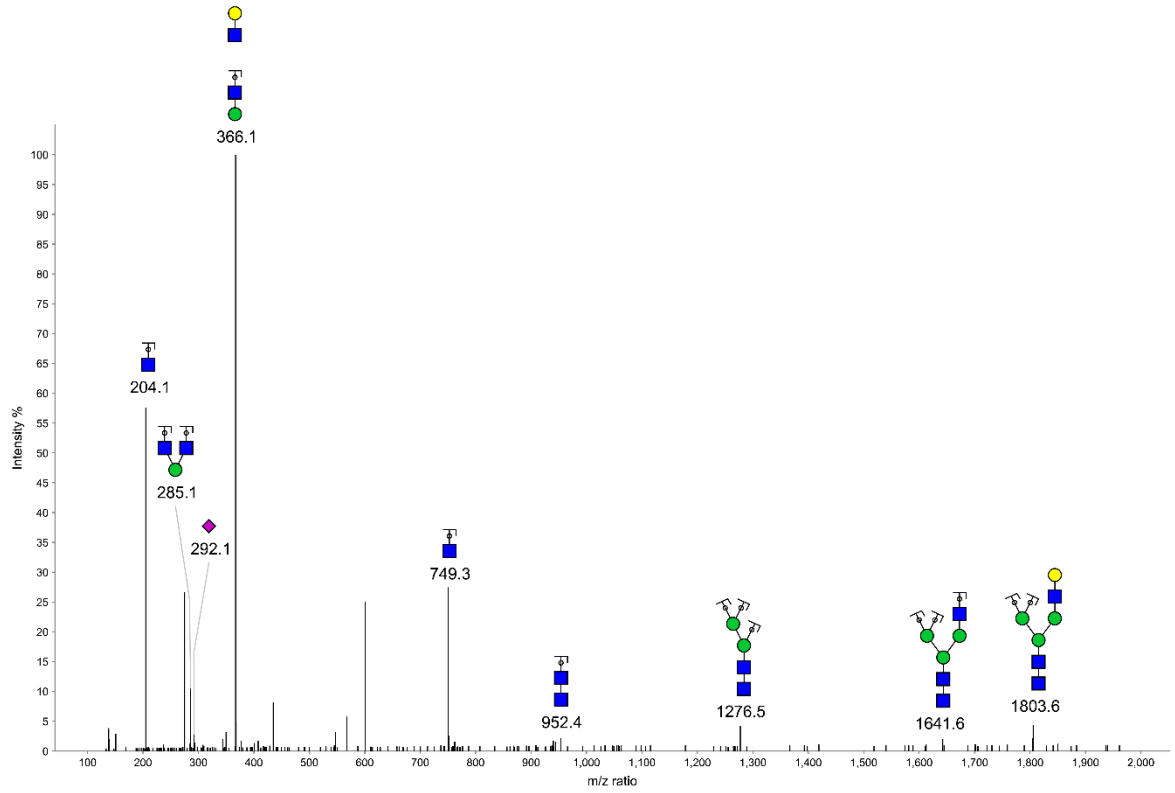

### CD16a N45 Peptide 1: FHNE

| Glycoform | Data set | Exact mass | Charge | Calculated mass | Observed mass | Retention time | Comment   |
|-----------|----------|------------|--------|-----------------|---------------|----------------|-----------|
| 5-6-1-1   | NK11     | 2970.0905  | 3      | 991.0372        | 991.0380      | 12.1 to 14.3   | Annotated |

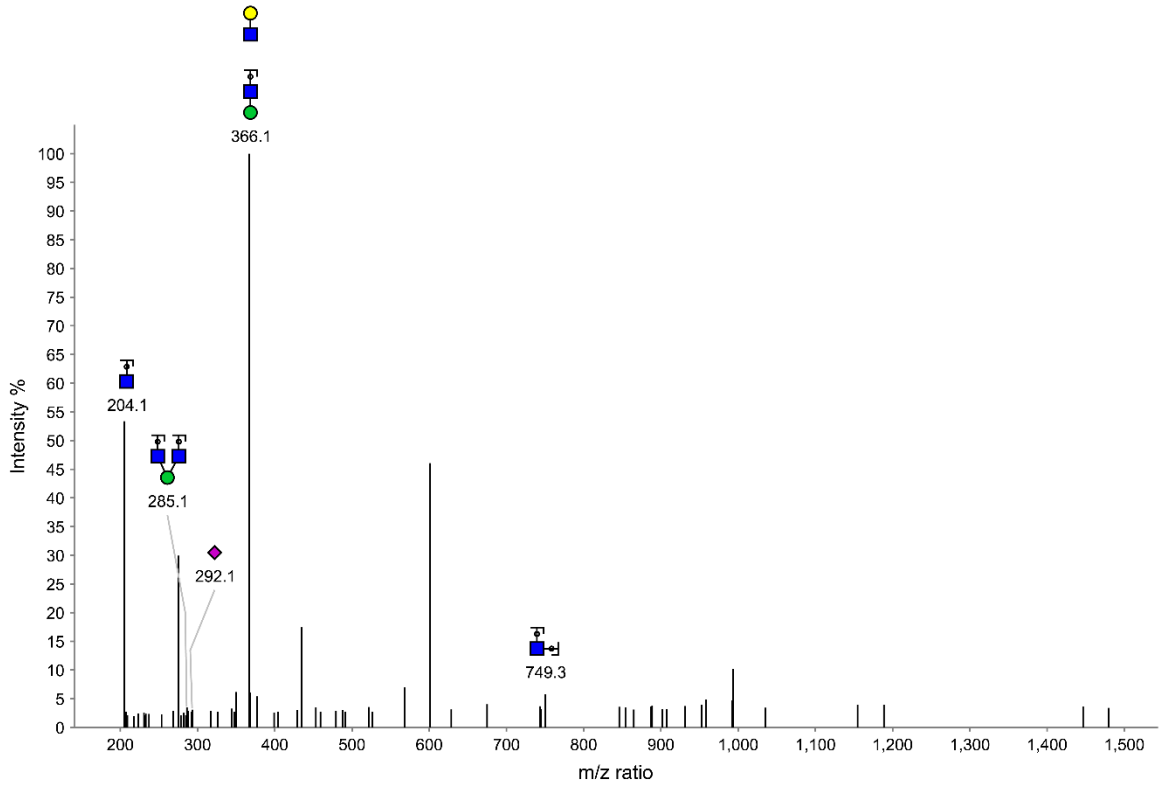

**CD16a N45 Peptide 1: FHNE**

| Glycoform | Data set | Exact mass | Charge | Calculated mass | Observed mass | Retention time | Comment   |
|-----------|----------|------------|--------|-----------------|---------------|----------------|-----------|
| 6-7-0-2   | NK08     | 3480.2602  | 3      | 1161.0937       | 1161.0949     | 8.6 to 13.5    | Annotated |

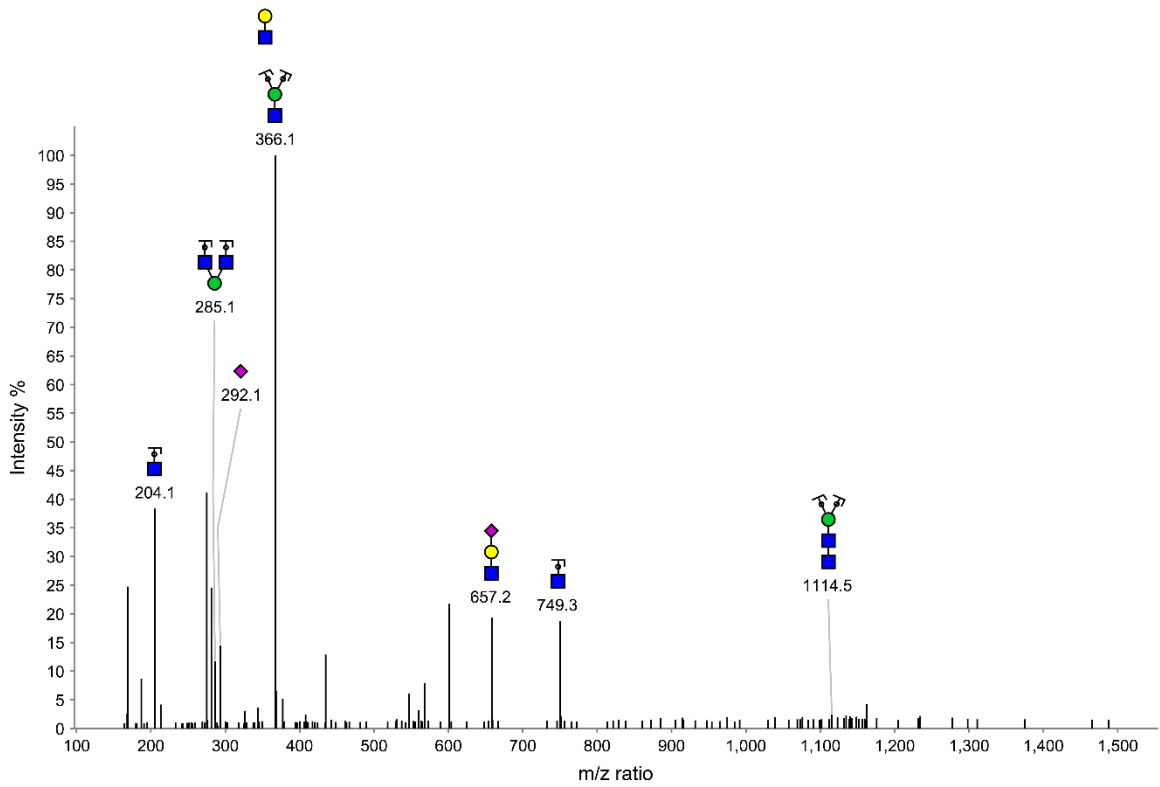

**CD16a N45 Peptide 1: FHNE**

| Glycoform | Data set | Exact mass | Charge | Calculated mass | Observed mass | Retention time | Comment   |
|-----------|----------|------------|--------|-----------------|---------------|----------------|-----------|
| 7-8-0-2   | NK11     | 3845.3924  | 3      | 1282.8045       | 1282.8040     | 10.4 to 10.7   | Annotated |

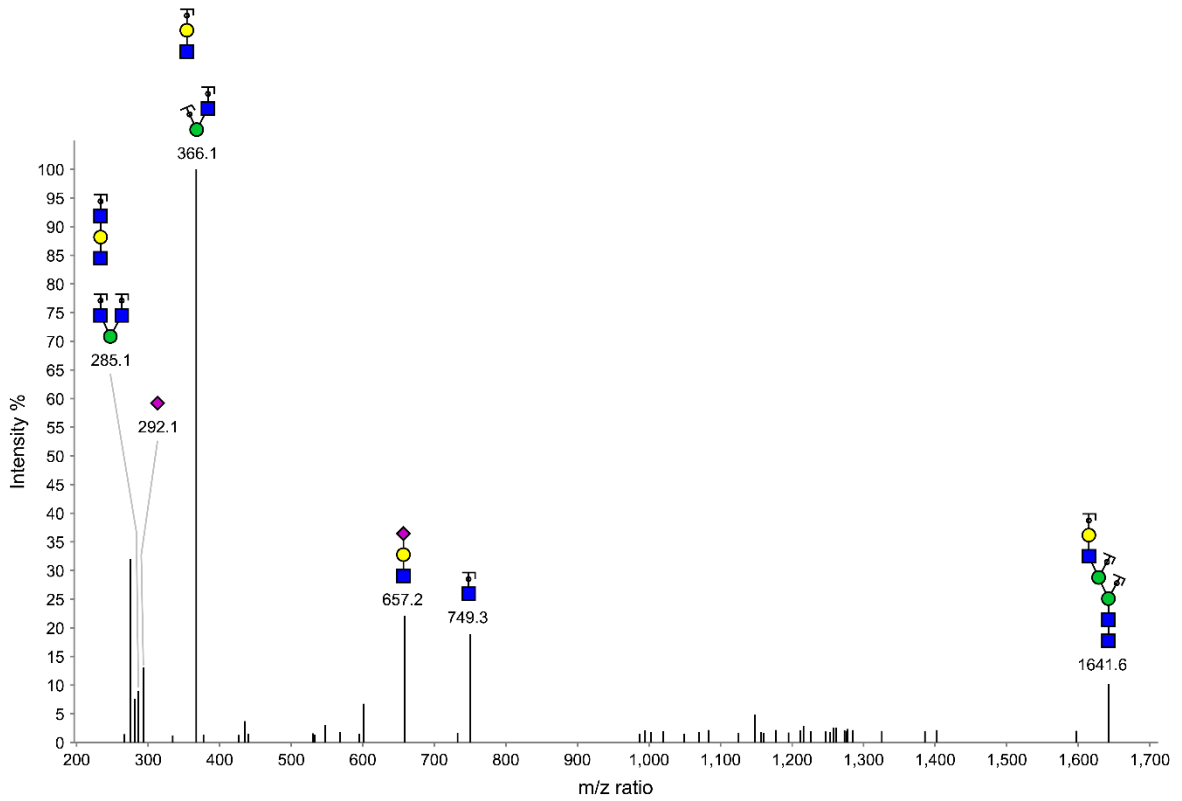

**CD16a N45 Peptide 1: FHNE**

| Glycoform | Data set | Exact mass | Charge | Calculated mass | Observed mass | Retention time | Comment                     |
|-----------|----------|------------|--------|-----------------|---------------|----------------|-----------------------------|
| 3-4-0-0   | NK11     | 1802.6728  | 2      | 902.3434        | 902.3449      | 34.1 to 37.4   | Peptide+GlcNAc not detected |
| 3-5-1-0   | NK11     | 2110.7835  | 2      | 1056.3988       | 1056.3995     | 31.9 to 34.8   | Peptide+GlcNAc not detected |
| 3-6-0-0   | NK11     | 2126.7784  | 2      | 1064.3962       | 1064.3990     | 31.9 to 33.9   | Peptide+GlcNAc not detected |
| 3-7-0-1   | NK08     | 2579.9266  | 2      | 1290.9703       | 1290.9701     | 12.1 to 13.7   | Peptide+GlcNAc not detected |
| 4-5-1-2   | NK11     | 2896.0537  | 3      | 966.3582        | 966.3602      | 10.1 to 12.1   | Peptide+GlcNAc not detected |
| 4-6-0-1   | NK08     | 2620.9532  | 2      | 1311.4836       | 1311.4829     | 10.2 to 17.7   | No MS2                      |
| 4-6-0-1   | NK11     | 2620.9532  | 2      | 1311.4836       | 1311.4912     | 10.8 to 13.2   | No MS2                      |
| 4-6-1-1   | NK11     | 2767.0111  | 2      | 1384.5126       | 1384.5132     | 12.1 to 14.1   | Peptide+GlcNAc not detected |
| 6-7-0-1   | NK11     | 3189.1648  | 3      | 1064.0619       | 1064.0614     | 11.0 to 11.6   | Peptide+GlcNAc not detected |
| 6-7-1-2   | NK11     | 3626.3181  | 3      | 1209.7797       | 1209.7837     | 22.9 to 23.9   | Peptide+GlcNAc not detected |

**CD16a N45 Peptide 1: FHNE**

| Glycoform | Data set | Exact mass | Charge | Calculated mass | Observed mass | Retention time | Comment   |
|-----------|----------|------------|--------|-----------------|---------------|----------------|-----------|
| 3-4-0-1   | NK13     | 3117.2555  | 3      | 1040.0922       | 1040.0919     | 36.4 to 37.3   | Annotated |

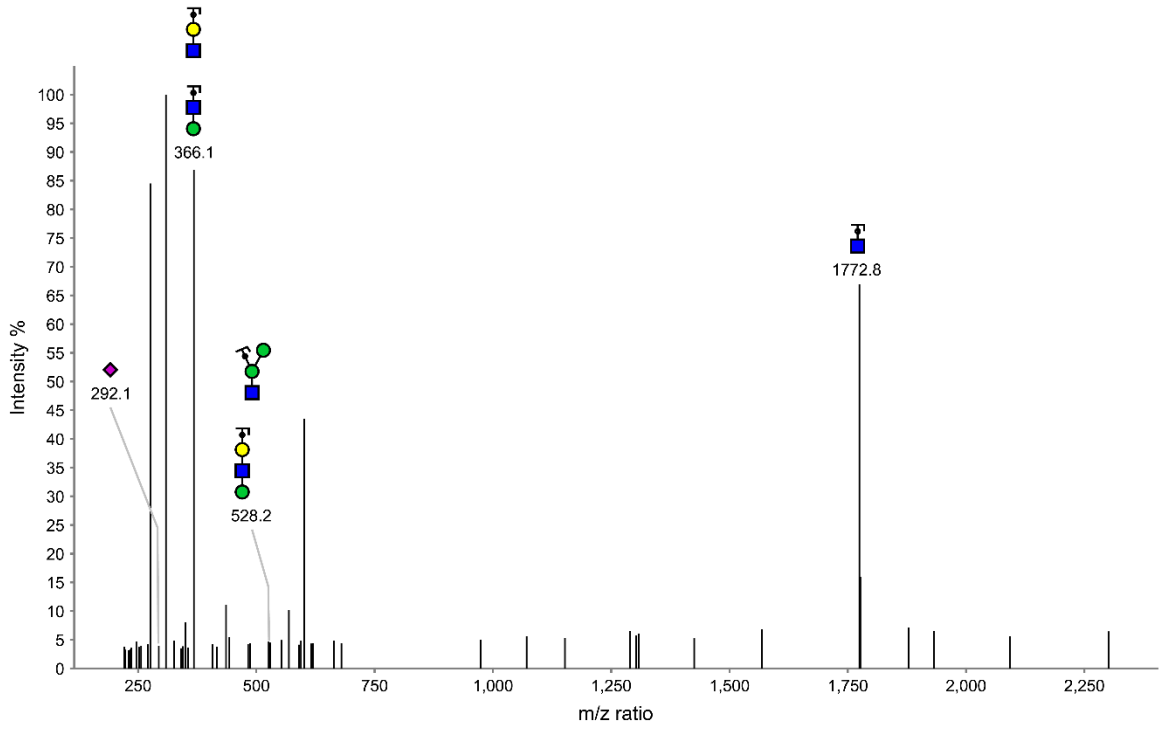

**CD16a N45 Peptide 2: FHNESLISSQASSY**

| Glycoform | Data set | Exact mass | Charge | Calculated mass | Observed mass | Retention time | Comment       |
|-----------|----------|------------|--------|-----------------|---------------|----------------|---------------|
| 3-4-1-1   | NK08     | 3263.3134  | 3      | 1088.7781       | 1088.7784     | 49.4 to 52.1   | Annotated     |
| 3-4-1-1   | NK13     | 3263.3134  | 3      | 1088.7781       | 1088.7769     | 36.1 to 37.3   | Not Annotated |

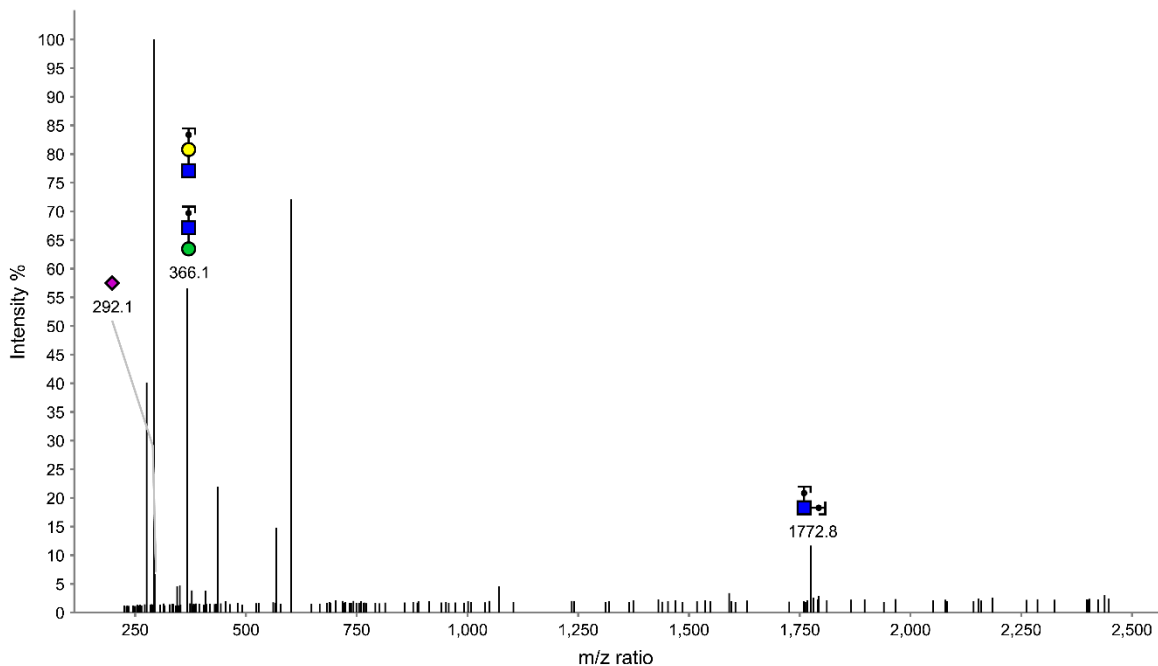

**CD16a N45 Peptide 2: FHNESLISSQASSY**



| Glycoform | Data set | Exact mass | Charge | Calculated mass | Observed mass | Retention time | Comment       |
|-----------|----------|------------|--------|-----------------|---------------|----------------|---------------|
| 3-5-0-1   | NK13     | 3279.3083  | 3      | 1094.1098       | 1094.1100     | 36.0 to 37.3   | Annotated     |
| 3-5-0-1   | NK08     | 3279.3083  | 3      | 1094.1098       | 1094.1110     | 49.6 to 52.4   | Not Annotated |

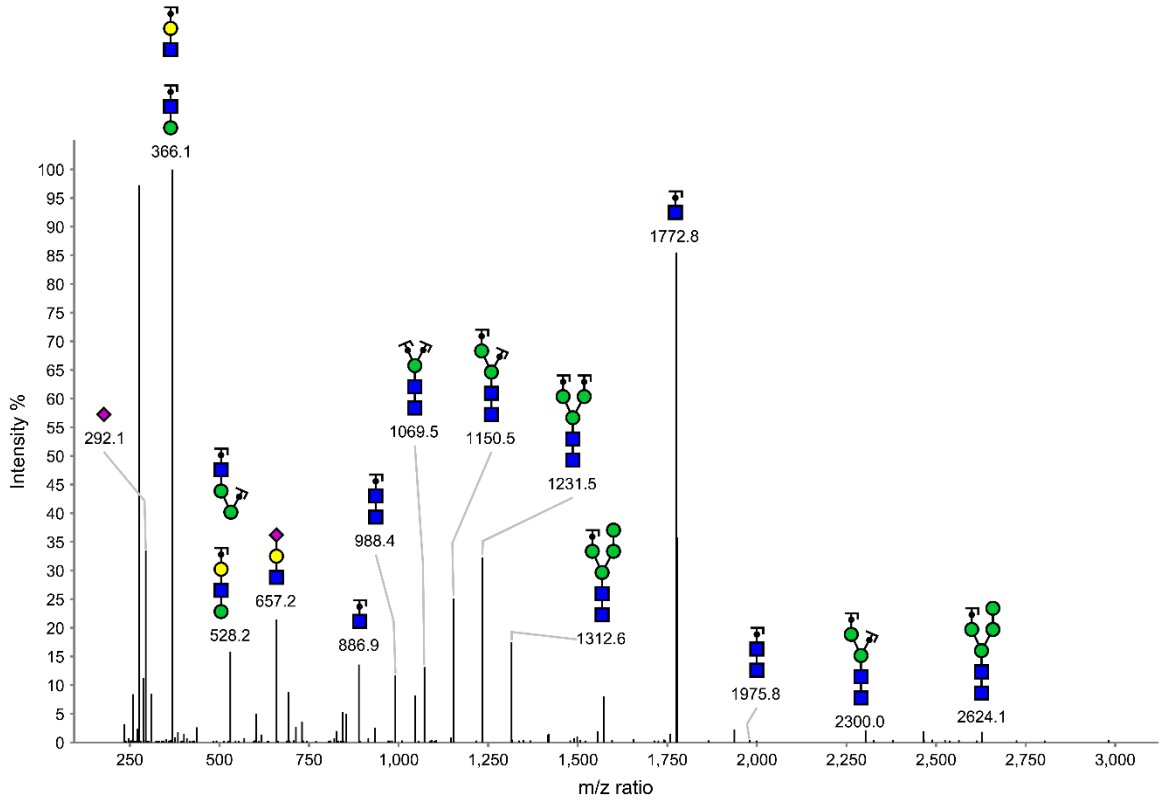

**CD16a N45 Peptide 2: FHNESLISSQASSY**

| Glycoform | Data set | Exact mass | Charge | Calculated mass | Observed mass | Retention time | Comment   |
|-----------|----------|------------|--------|-----------------|---------------|----------------|-----------|
| 3-5-1-0   | NK08     | 3134.2708  | 3      | 1045.7639       | 1045.7640     | 58.3 to 61.9   | Annotated |

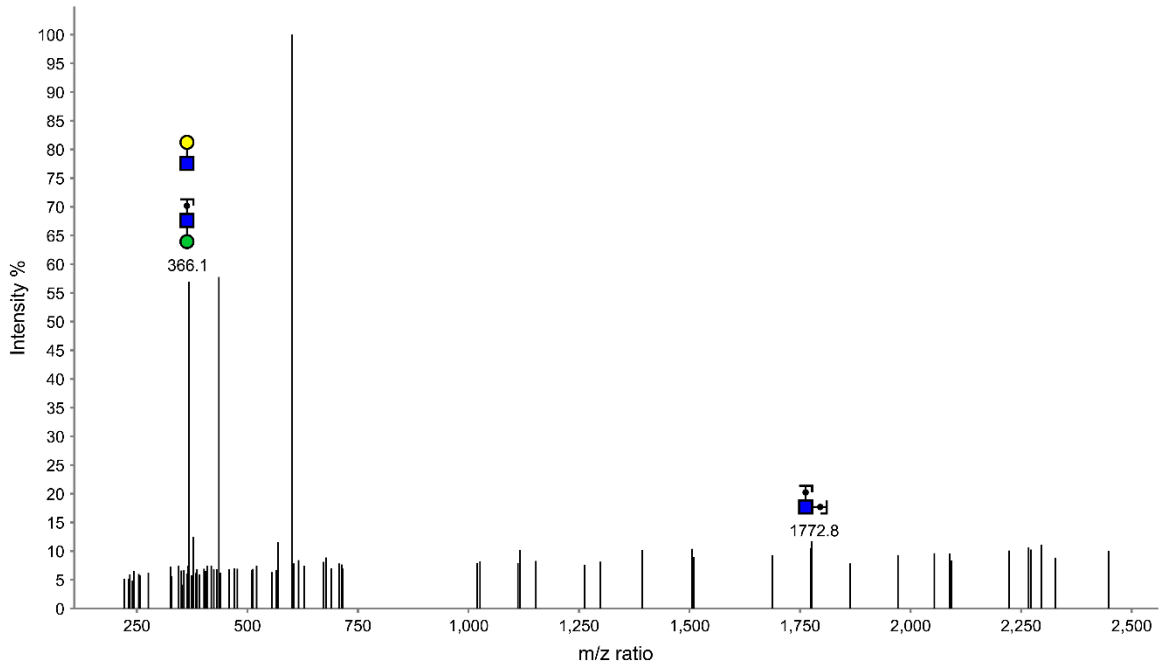

**CD16a N45 Peptide 2: FHNESLISSQASSY**

| Glycoform | Data set | Exact mass | Charge | Calculated mass | Observed mass | Retention time | Comment              |
|-----------|----------|------------|--------|-----------------|---------------|----------------|----------------------|
| 3-5-1-1   | NK13     | 3425.3662  | 3      | 1142.7957       | 1142.7946     | 36.3 to 36.8   | Annotated (Figure 2) |
| 3-5-1-1   | NK08     | 3425.3662  | 3      | 1142.7957       | 1142.7966     | 49.1 to 52.6   | Not Annotated        |

**CD16a N45 Peptide 2: FHNESLISSQASSY**

| Glycoform | Data set | Exact mass | Charge | Calculated mass | Observed mass | Retention time | Comment       |
|-----------|----------|------------|--------|-----------------|---------------|----------------|---------------|
| 3-6-0-1   | NK08     | 3441.3611  | 3      | 1148.1274       | 1148.1267     | 48.3 to 52.4   | Annotated     |
| 3-6-0-1   | NK13     | 3441.3611  | 3      | 1148.1274       | 1148.1265     | 32.3 to 37.5   | Not Annotated |

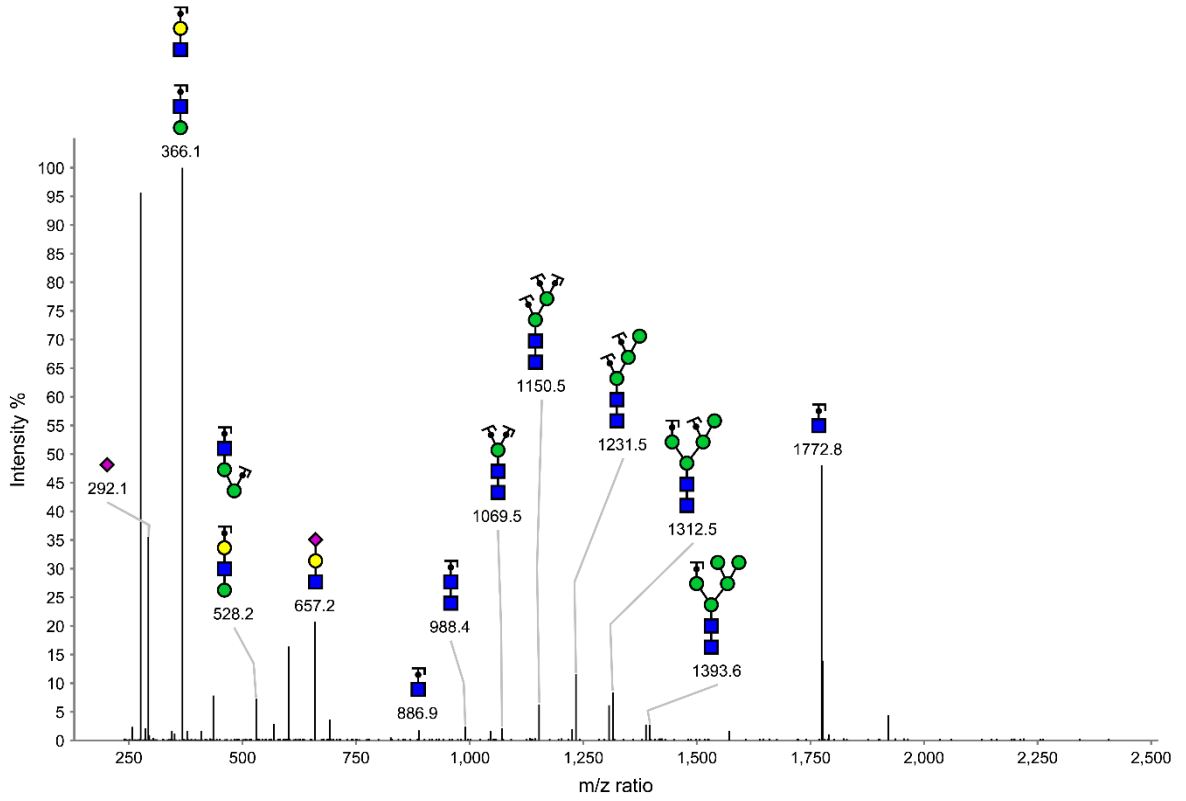

**CD16a N45 Peptide 2: FHNESLISSQASSY**

| Glycoform | Data set | Exact mass | Charge | Calculated mass | Observed mass | Retention time | Comment       |
|-----------|----------|------------|--------|-----------------|---------------|----------------|---------------|
| 3-6-1-1   | NK08     | 3587.419   | 3      | 1196.8133       | 1196.8136     | 48.2 to 52.3   | Annotated     |
| 3-6-1-1   | NK13     | 3587.419   | 3      | 1196.8133       | 1196.8120     | 35.6 to 36.9   | Not Annotated |

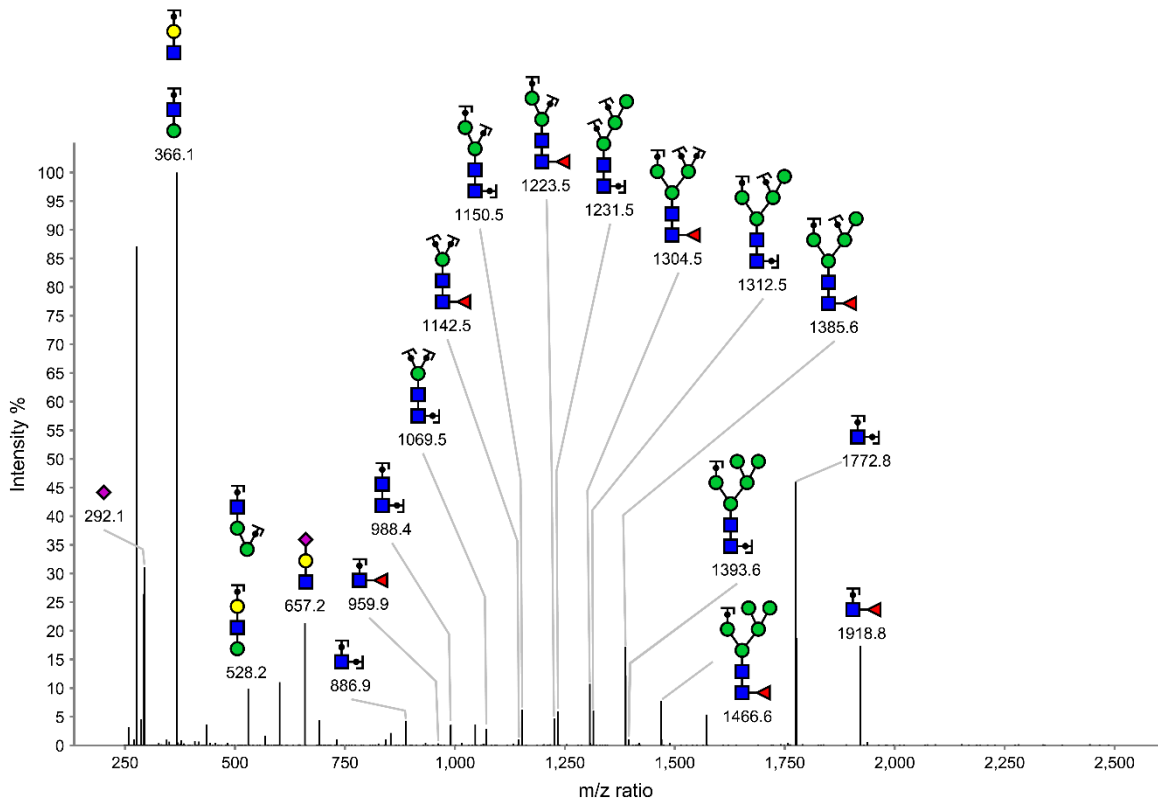

**CD16a N45 Peptide 2: FHNESLISSQASSY**

| Glycoform | Data set | Exact mass | Charge | Calculated mass | Observed mass | Retention time | Comment       |
|-----------|----------|------------|--------|-----------------|---------------|----------------|---------------|
| 3-7-0-1   | NK13     | 3603.4139  | 3      | 1202.1450       | 1202.1430     | 35.8 to 36.5   | Annotated     |
| 3-7-0-1   | NK08     | 3603.4139  | 3      | 1202.1450       | 1202.1436     | 48.7 to 51.5   | Not Annotated |

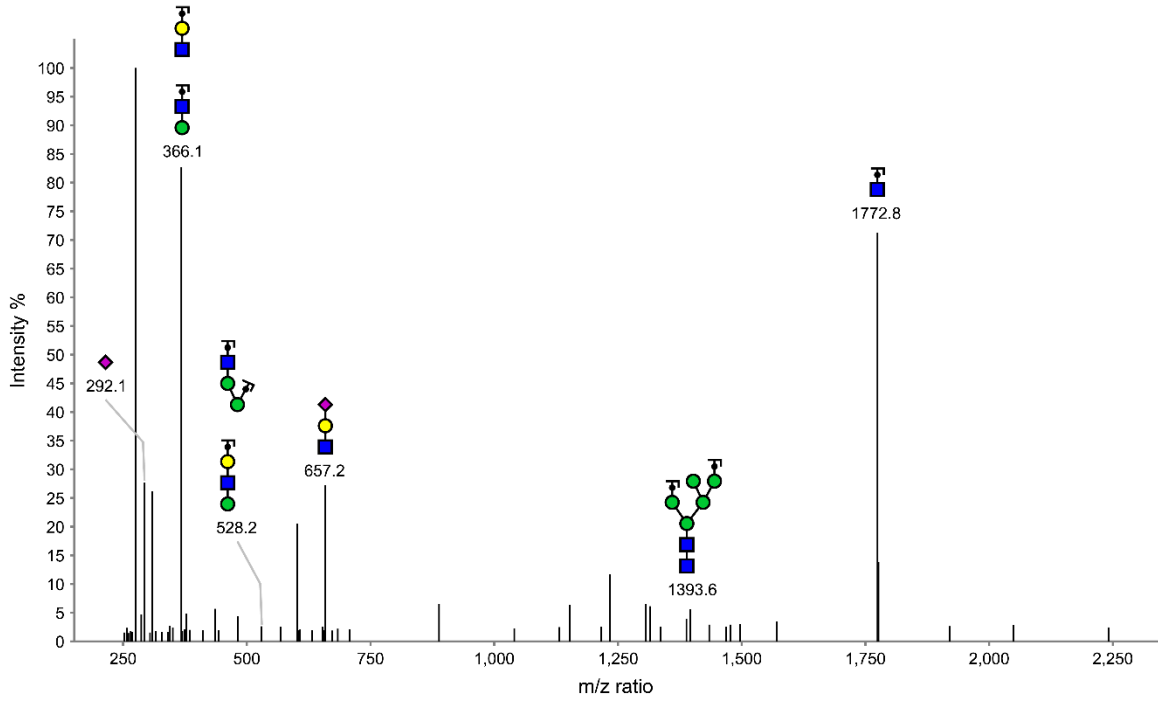

**CD16a N45 Peptide 2: FHNESLISSQASSY**

| Glycoform | Data set | Exact mass | Charge | Calculated mass | Observed mass | Retention time | Comment       |
|-----------|----------|------------|--------|-----------------|---------------|----------------|---------------|
| 4-5-0-1   | NK13     | 3482.3877  | 3      | 1161.8029       | 1161.8023     | 35.4 to 36.9   | Annotated     |
| 4-5-0-1   | NK08     | 3482.3877  | 3      | 1161.8029       | 1161.8026     | 47.7 to 51.3   | Not Annotated |

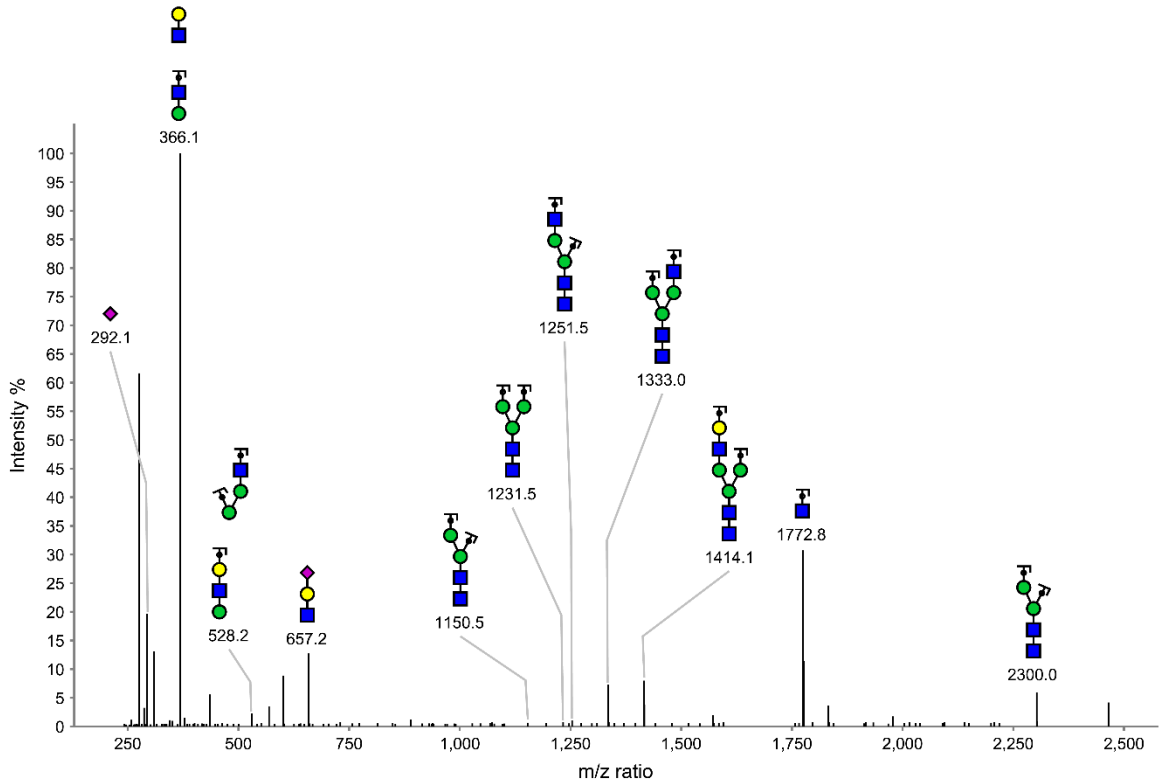

**CD16a N45 Peptide 2: FHNESLISSQASSY**

| Glycoform | Data set | Exact mass | Charge | Calculated mass | Observed mass | Retention time | Comment       |
|-----------|----------|------------|--------|-----------------|---------------|----------------|---------------|
| 4-5-0-2   | NK13     | 3773.4831  | 3      | 1258.8347       | 1258.8352     | 39.0 to 42.0   | Annotated     |
| 4-5-0-2   | NK08     | 3773.4831  | 3      | 1258.8347       | 1258.8384     | 41.6 to 47.0   | Not Annotated |

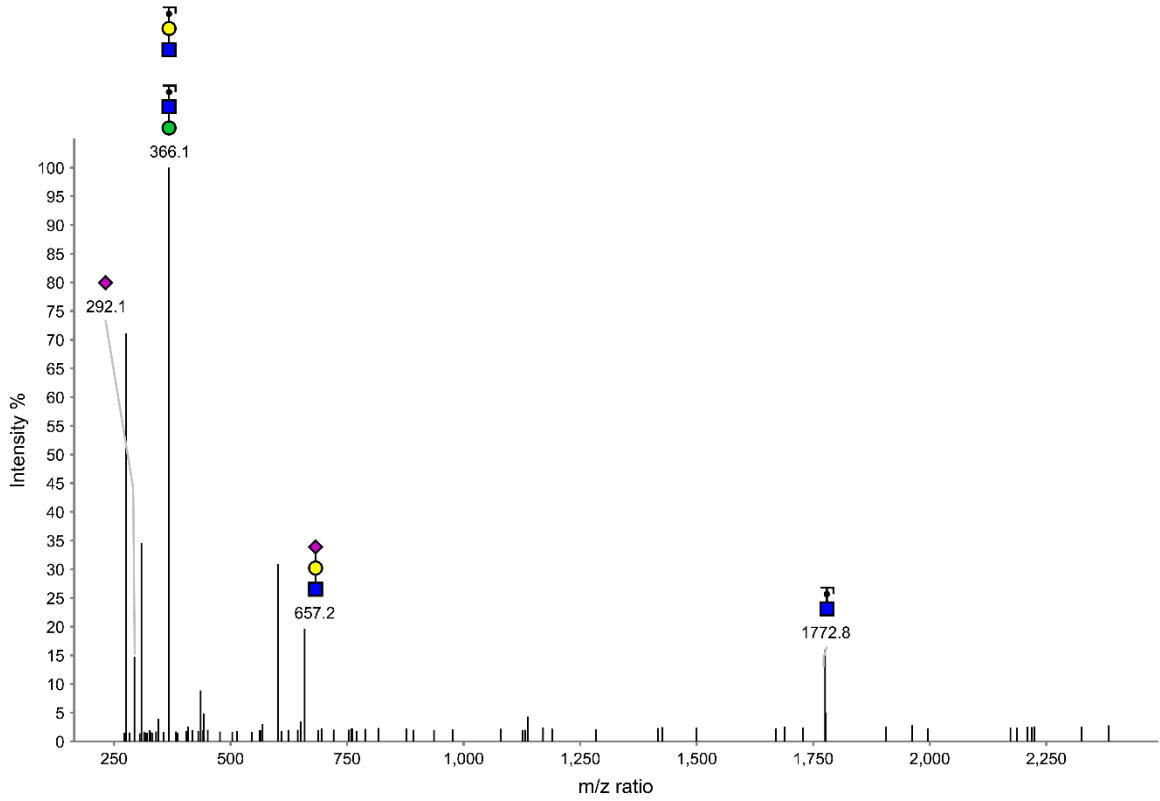

**CD16a N45 Peptide 2: FHNESLISSQASSY**



| Glycoform | Data set | Exact mass | Charge | Calculated mass | Observed mass | Retention time | Comment               |
|-----------|----------|------------|--------|-----------------|---------------|----------------|-----------------------|
| 4-5-1-1   | NK13     | 3628.4456  | 3      | 1210.4889       | 1210.4863     | 35.6 to 36.6   | Annotated (Figure S4) |
| 4-5-1-1   | NK08     | 3628.4456  | 3      | 1210.4889       | 1210.4825     | 48.0 to 51.8   | Not Annotated         |

**CD16a N45 Peptide 2: FHNESLISSQASSY**

| Glycoform | Data set | Exact mass | Charge | Calculated mass | Observed mass | Retention time | Comment   |
|-----------|----------|------------|--------|-----------------|---------------|----------------|-----------|
| 4-5-1-2   | NK13     | 3919.541   | 3      | 1307.5207       | 1307.5121     | 38.9 to 40     | Annotated |
| 4-5-1-2   | NK08     | 3919.541   | 3      | 1307.5207       | 1307.5162     | 56.1 to 59.5   | No MS2    |

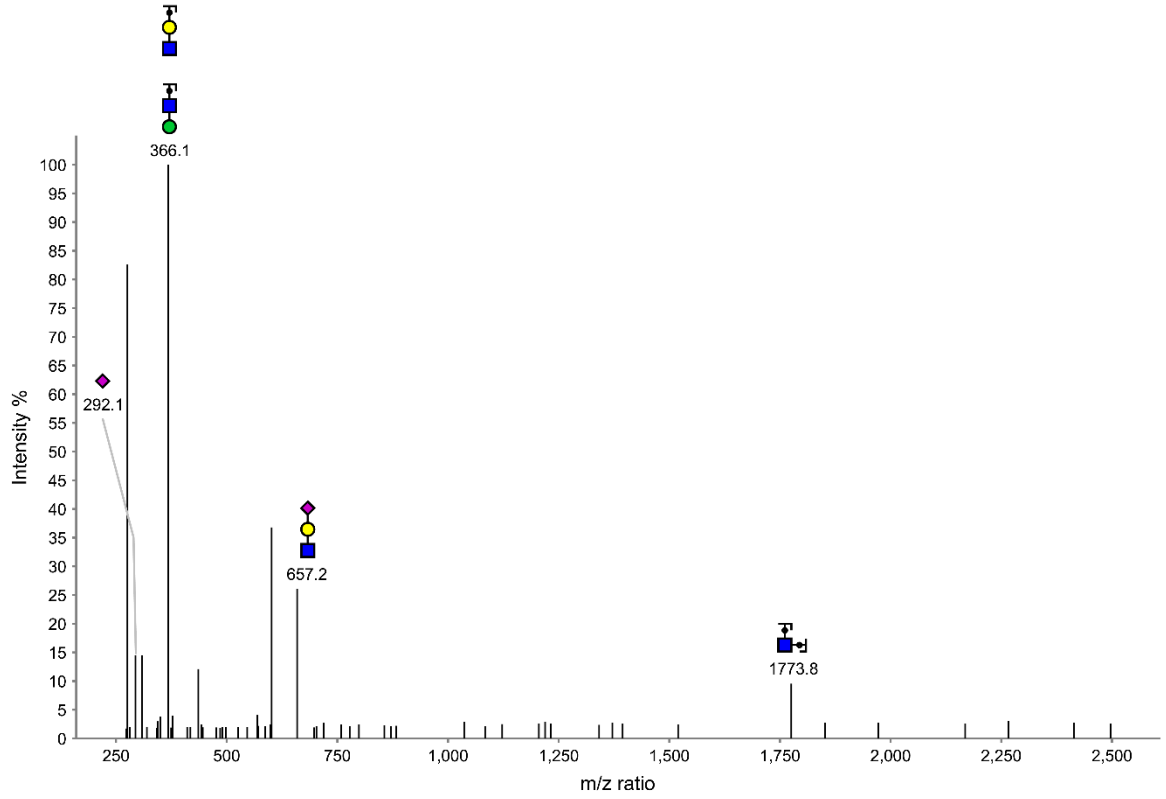

**CD16a N45 Peptide 2: FHNESLISSQASSY**

| Glycoform | Data set | Exact mass | Charge | Calculated mass | Observed mass | Retention time | Comment       |
|-----------|----------|------------|--------|-----------------|---------------|----------------|---------------|
| 4-6-0-1   | NK13     | 3644.4405  | 3      | 1215.8205       | 1215.8184     | 35.8 to 36.4   | Annotated     |
| 4-6-0-1   | NK08     | 3644.4405  | 3      | 1215.8205       | 1215.8196     | 47.1 to 51.1   | Not Annotated |

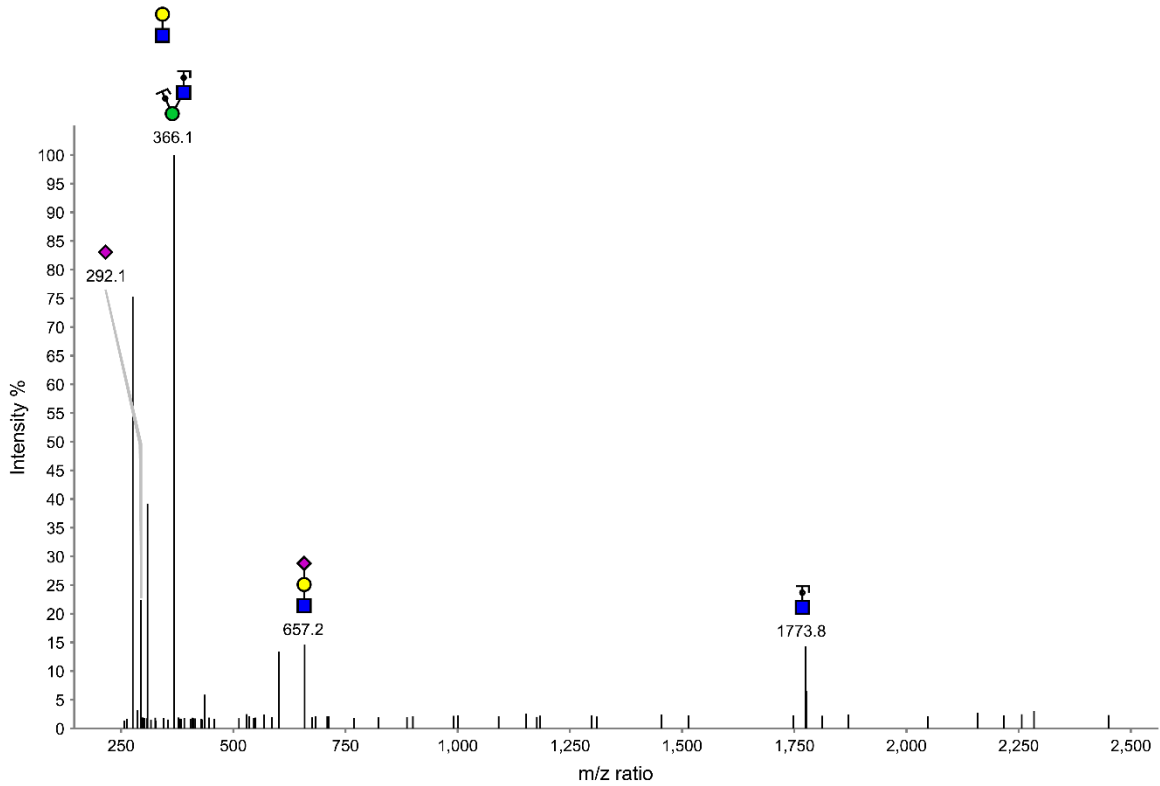

**CD16a N45 Peptide 2: FHNESLISSQASSY**

| Glycoform | Data set | Exact mass | Charge | Calculated mass | Observed mass | Retention time | Comment       |
|-----------|----------|------------|--------|-----------------|---------------|----------------|---------------|
| 4-6-1-1   | NK08     | 3790.4984  | 3      | 1264.5065       | 1264.5077     | 47.5 to 51.2   | Annotated     |
| 4-6-1-1   | NK13     | 3790.4984  | 3      | 1264.5065       | 1264.5024     | 35.5 to 36.5   | Not Annotated |

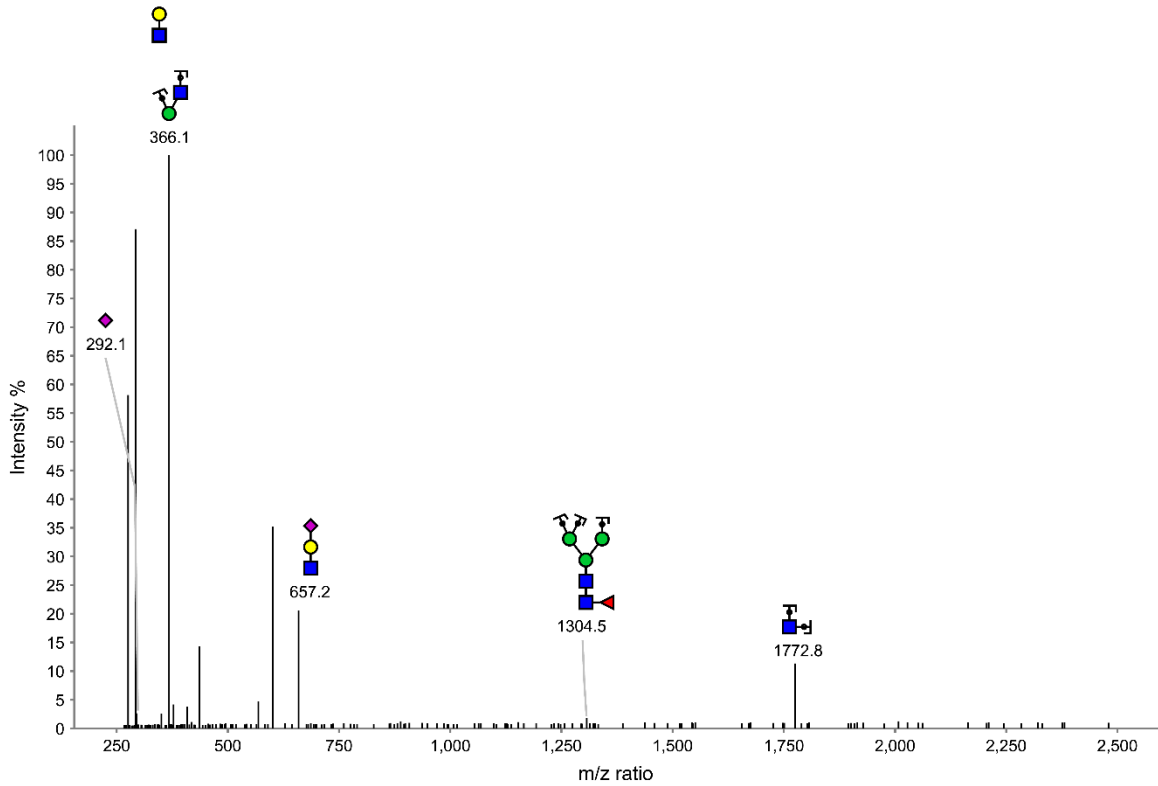

**CD16a N45 Peptide 2: FHNESLISSQASSY**

| Glycoform | Data set | Exact mass | Charge | Calculated mass | Observed mass | Retention time | Comment       |
|-----------|----------|------------|--------|-----------------|---------------|----------------|---------------|
| 4-7-1-1   | NK13     | 3952.5512  | 3      | 1318.5241       | 1318.5230     | 35.4 to 36.3   | Annotated     |
| 4-7-1-1   | NK08     | 3952.5512  | 3      | 1318.5241       | 1318.5238     | 47.5 to 48.9   | Not Annotated |

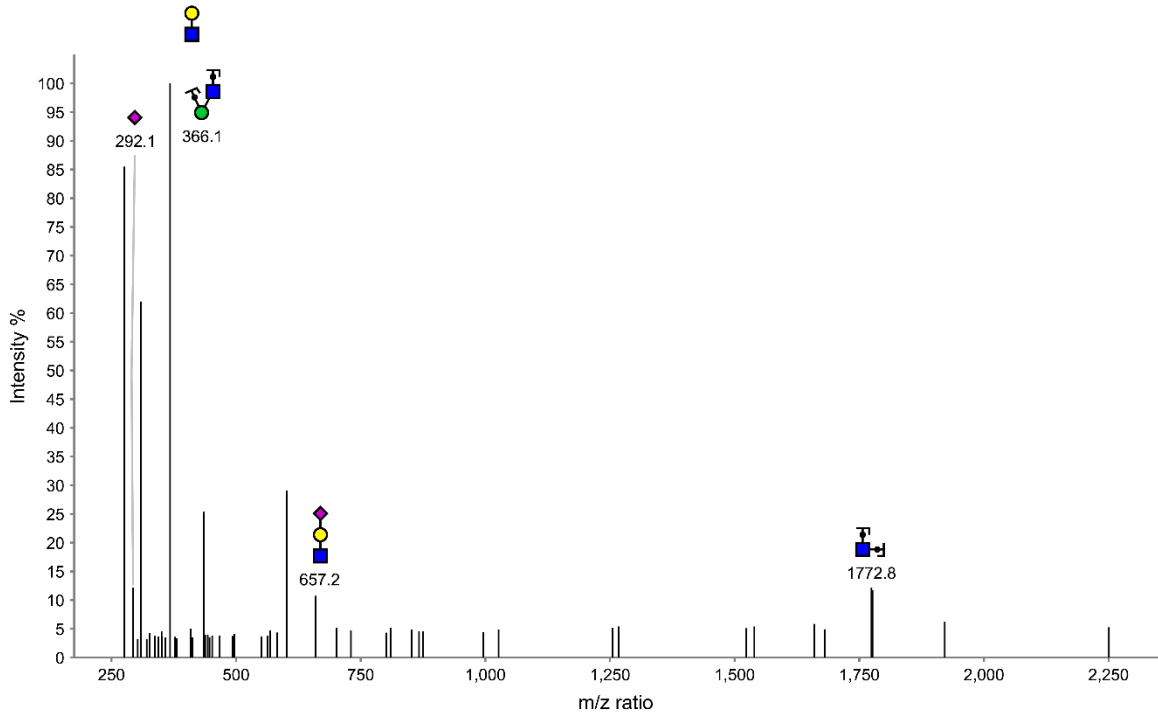

**CD16a N45 Peptide 2: FHNESLISSQASSY**

| Glycoform | Data set | Exact mass | Charge | Calculated mass | Observed mass | Retention time | Comment   |
|-----------|----------|------------|--------|-----------------|---------------|----------------|-----------|
| 5-6-0-1   | NK13     | 3847.5199  | 3      | 1283.5136       | 1283.5132     | 35.5 to 36.4   | Annotated |

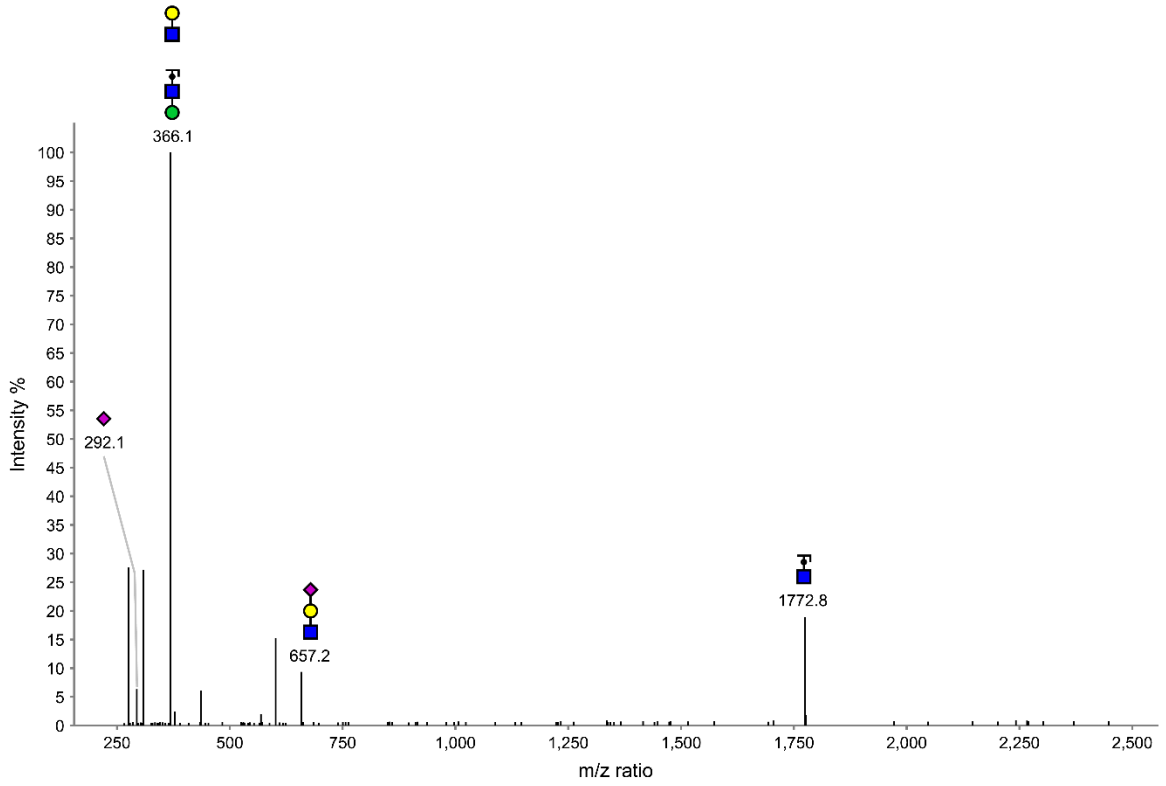

**CD16a N45 Peptide 2: FHNESLISSQASSY**

| Glycoform | Data set | Exact mass | Charge | Calculated mass | Observed mass | Retention time | Comment       |
|-----------|----------|------------|--------|-----------------|---------------|----------------|---------------|
| 5-6-1-1   | NK13     | 3993.5778  | 3      | 1332.1996       | 1332.2005     | 35.2 to 36.0   | Annotated     |
| 5-6-1-1   | NK08     | 3993.5778  | 4      | 999.4015        | 999.3955      | 47.5 to 50.7   | Not Annotated |

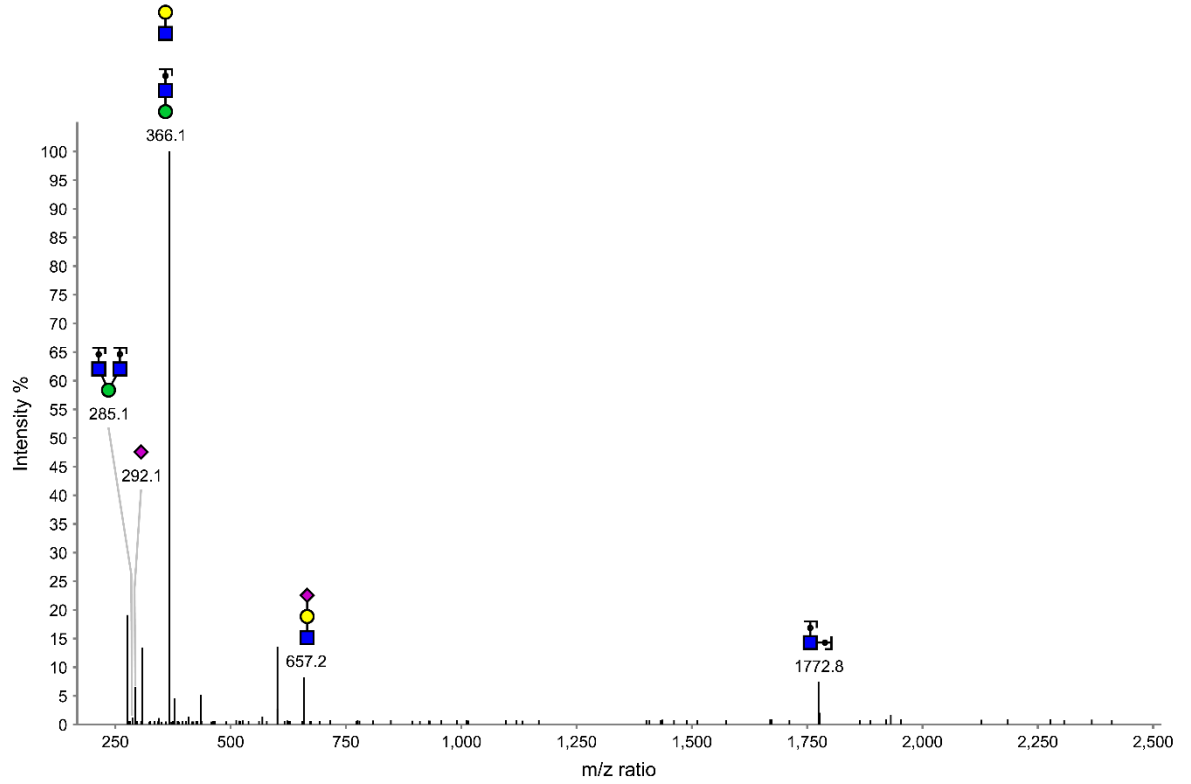

**CD16a N45 Peptide 2: FHNESLISSQASSY**

| Glycoform | Data set | Exact mass | Charge | Calculated mass | Observed mass | Retention time | Comment   |
|-----------|----------|------------|--------|-----------------|---------------|----------------|-----------|
| 5-6-2-1   | NK13     | 4139.6357  | 3      | 1380.8856       | 1380.8798     | 38.7 to 39.9   | Annotated |

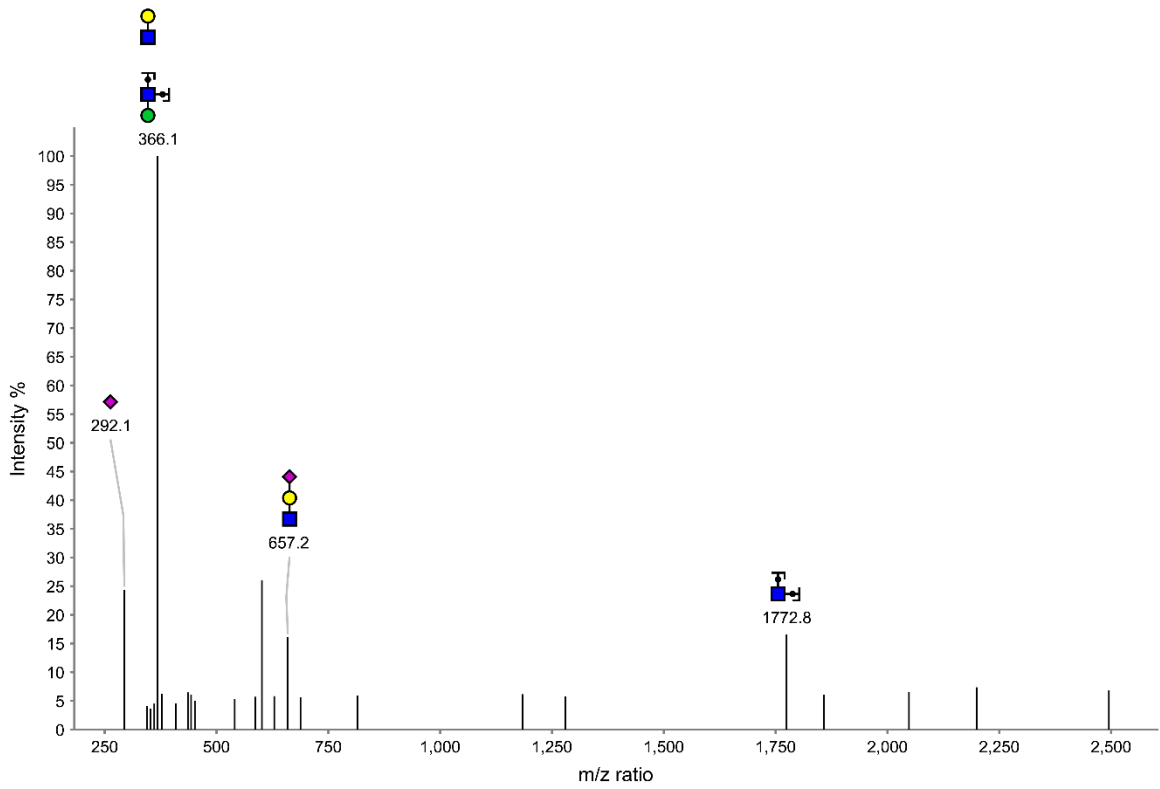

**CD16a N45 Peptide 2: FHNESLISSQASSY**



| Glycoform | Data set | Exact mass | Charge | Calculated mass | Observed mass | Retention time | Comment   |
|-----------|----------|------------|--------|-----------------|---------------|----------------|-----------|
| 5-8-0-1   | NK13     | 4171.6255  | 3      | 1391.5488       | 1391.5434     | 33.3 to 35.3   | Annotated |

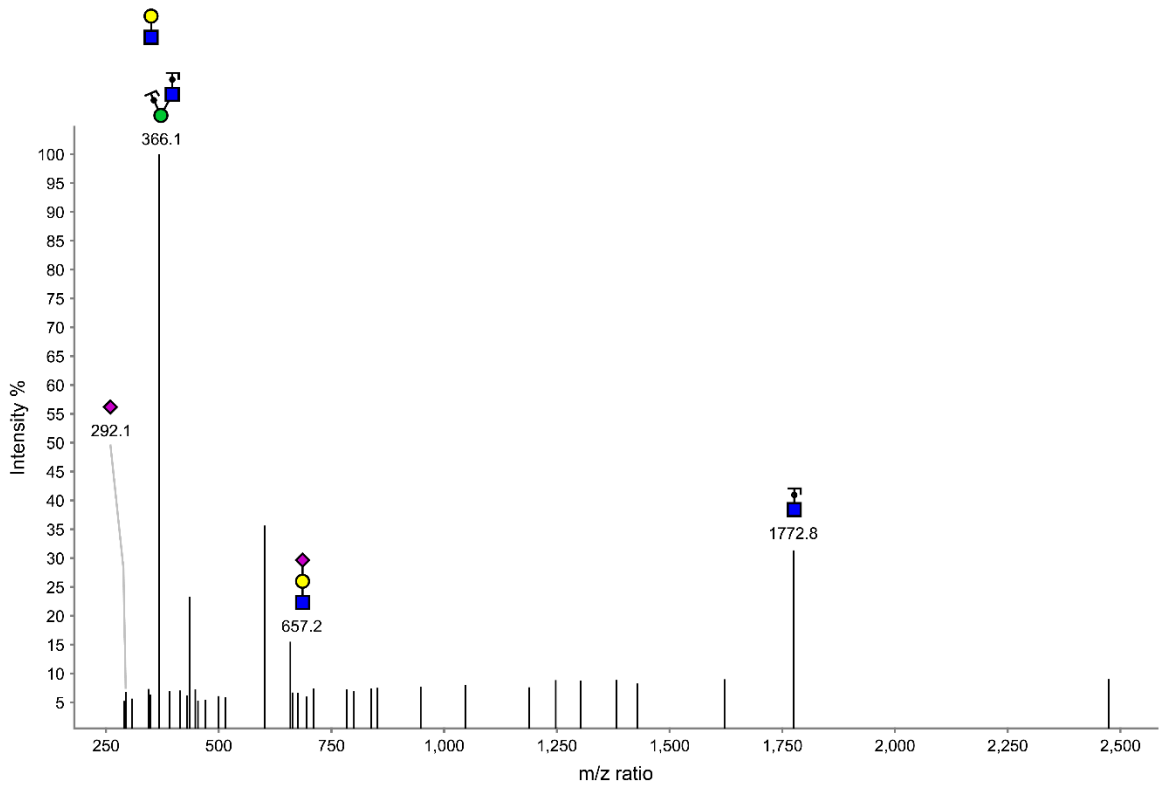

**CD16a N45 Peptide 2: FHNESLISSQASSY**

| Glycoform | Data set | Exact mass | Charge | Calculated mass | Observed mass | Retention time | Comment   |
|-----------|----------|------------|--------|-----------------|---------------|----------------|-----------|
| 6-7-0-2   | NK13     | 4503.7475  | 4      | 1126.9439       | 1126.9429     | 37.7 to 38.9   | Annotated |

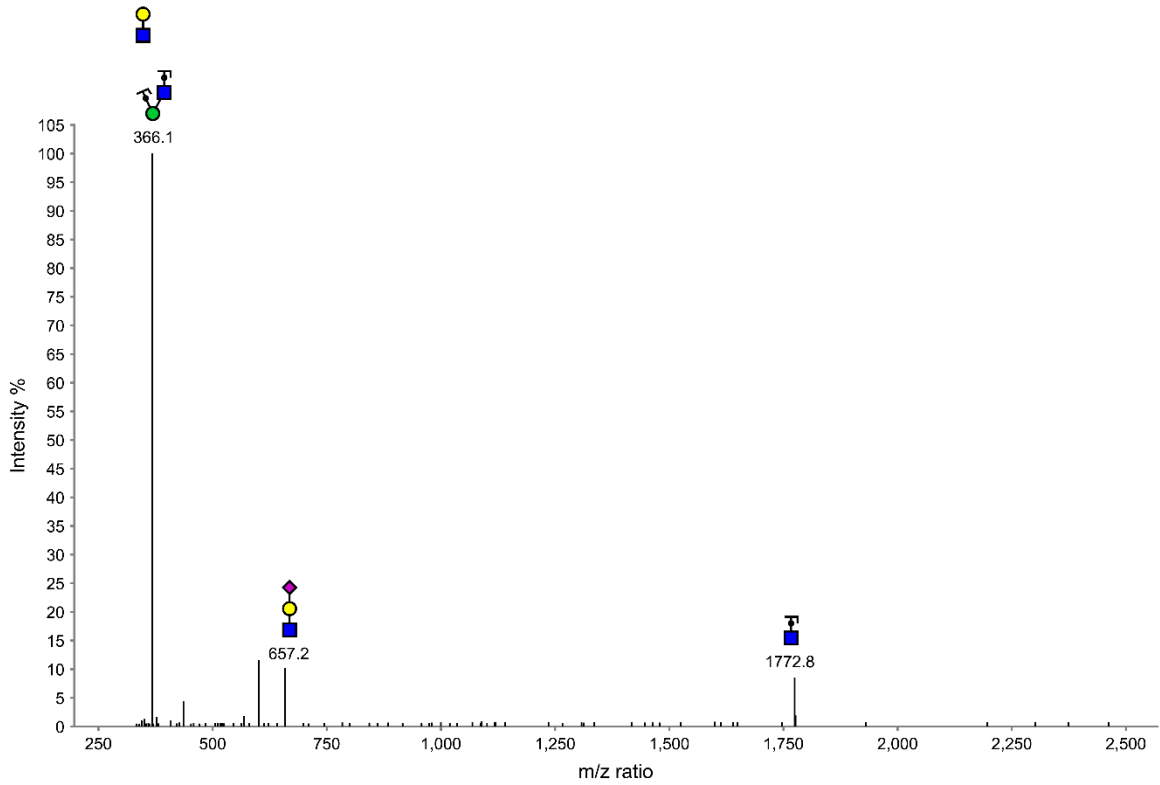

**CD16a N45 Peptide 2: FHNESLISSQASSY**

| Glycoform | Data set | Exact mass | Charge | Calculated mass | Observed mass | Retention time | Comment   |
|-----------|----------|------------|--------|-----------------|---------------|----------------|-----------|
| 7-8-0-2   | NK13     | 4868.8797  | 4      | 1218.2269       | 1218.2255     | 37.1 to 38.7   | Annotated |

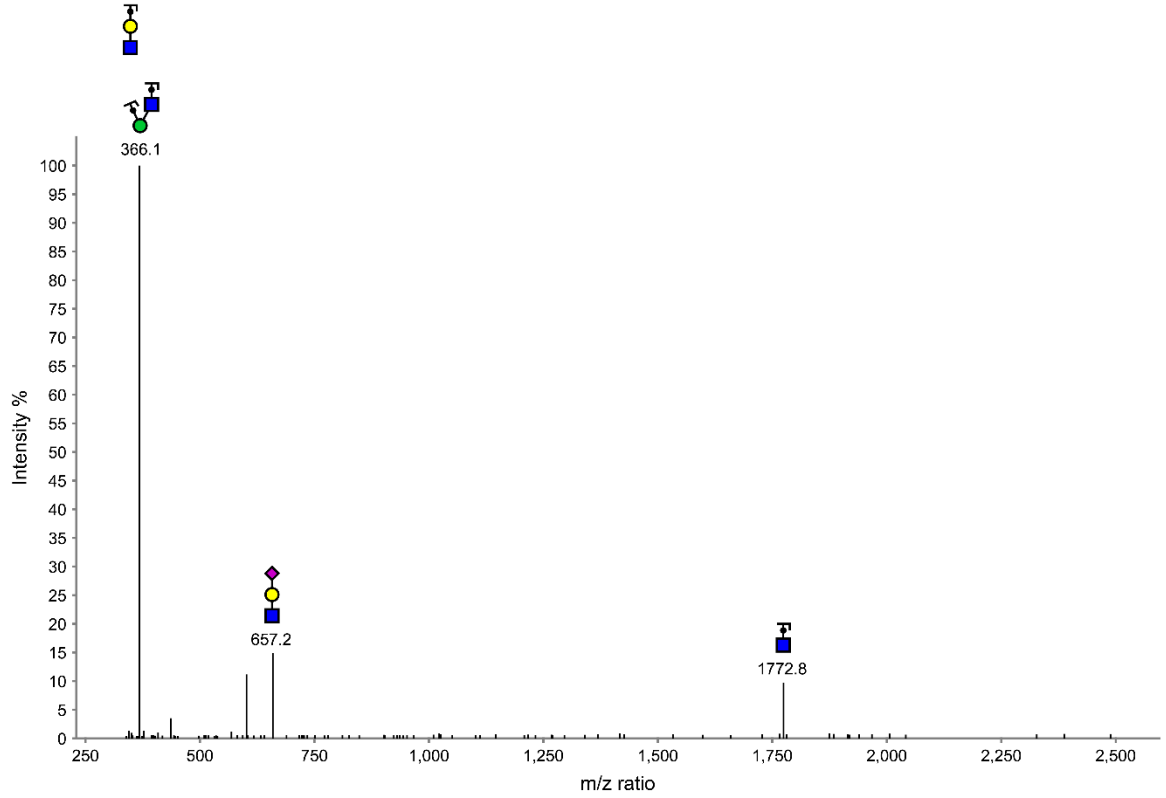

**CD16a N45 Peptide 2: FHNESLISSQASSY**

| Glycoform | Data set | Exact mass | Charge | Calculated mass | Observed mass | Retention time | Comment   |
|-----------|----------|------------|--------|-----------------|---------------|----------------|-----------|
| 7-8-2-2   | NK13     | 5160.9955  | 4      | 1291.2559       | 1291.2541     | 40.4 to 42.3   | Annotated |

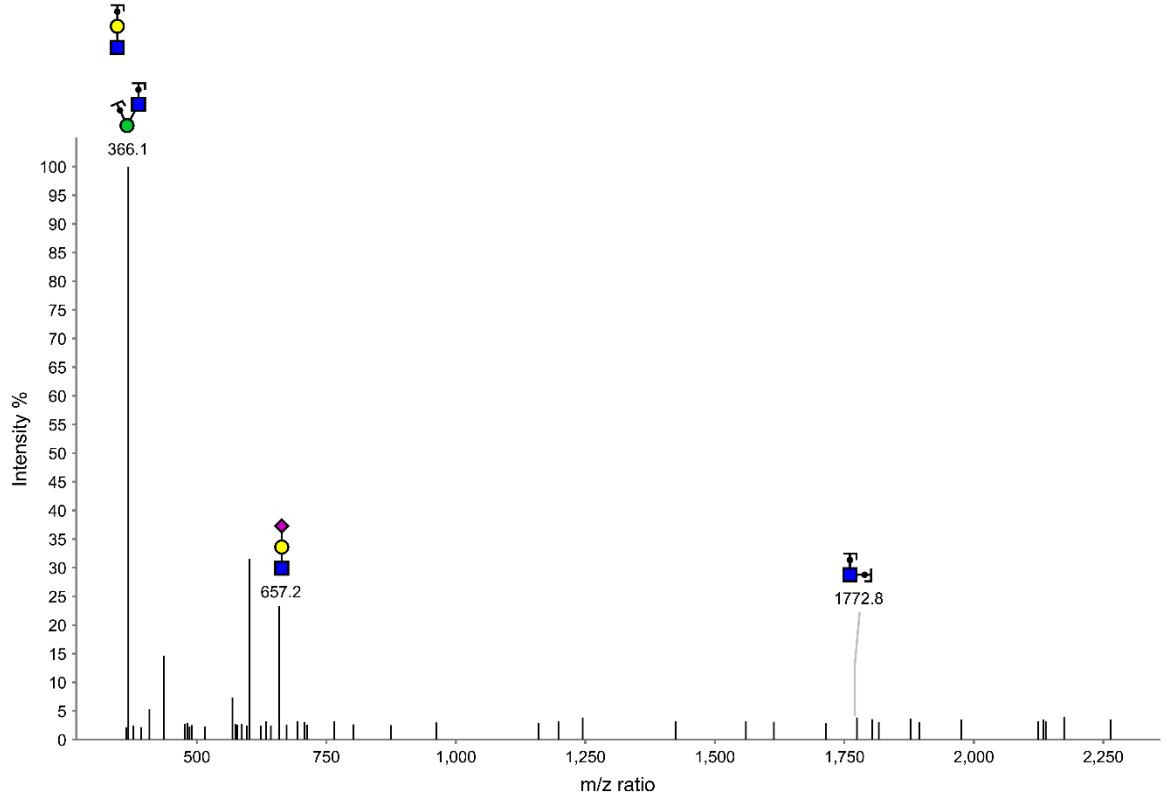

**CD16a N45 Peptide 2: FHNESLISSQASSY**

| Glycoform | Data set | Exact mass | Charge | Calculated mass | Observed mass | Retention time | Comment   |
|-----------|----------|------------|--------|-----------------|---------------|----------------|-----------|
| 8-9-0-2   | NK13     | 5234.0119  | 4      | 1309.5100       | 1309.5070     | 36.4 to 37.7   | Annotated |

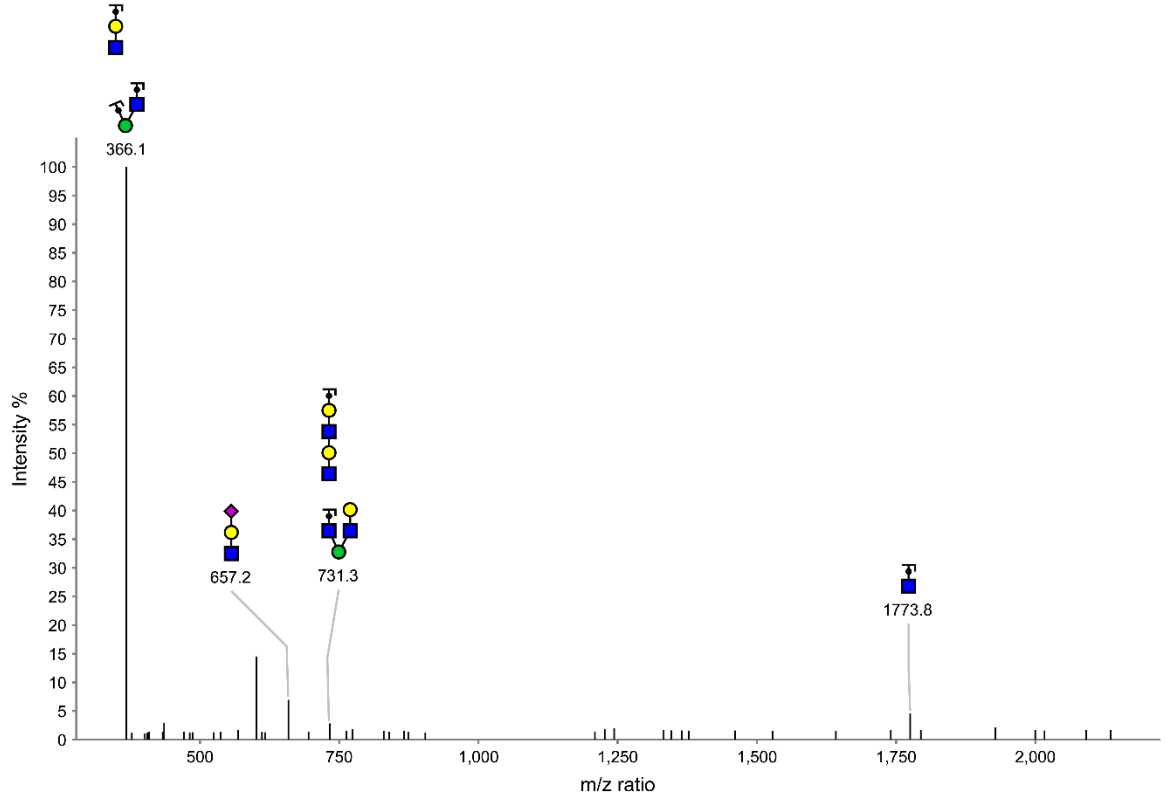

**CD16a N45 Peptide 2: FHNESLISSQASSY**

| Glycoform | Data set | Exact mass | Charge | Calculated mass | Observed mass | Retention time | Comment                     |
|-----------|----------|------------|--------|-----------------|---------------|----------------|-----------------------------|
| 2-9-0-0   | NK09     | 3433.3447  | 3      | 1145.4552       | 1145.4602     | 55.1 to 56.2   | No MS2                      |
| 3-4-1-0   | NK08     | 2972.218   | 3      | 991.7463        | 991.7453      | 60.4 to 61.8   | No MS2                      |
| 3-6-1-0   | NK13     | 3296.3236  | 3      | 1099.7815       | 1099.7810     | 32.4 to 33.6   | No MS2                      |
| 3-6-1-0   | NK08     | 3296.3236  | 3      | 1099.7815       | 1099.7761     | 57.6 to 61.1   | No MS2                      |
| 5-6-1-2   | NK13     | 4284.6732  | 3      | 1429.2314       | 1429.2338     | 38.2 to 39.8   | Peptide+GlcNAc not detected |
| 5-6-1-2   | NK08     | 4284.6732  | 4      | 1072.1753       | 1072.1728     | 40.7 to 41.7   | No MS2                      |
| 5-6-2-2   | NK13     | 4430.7311  | 3      | 1477.9174       | 1477.9111     | 42.6 to 43.4   | No MS2                      |
| 5-6-3-1   | NK13     | 4285.6936  | 3      | 1429.5715       | 1429.5643     | 38.9 to 39.7   | No MS2                      |
| 5-7-0-1   | NK13     | 4009.5727  | 3      | 1337.5312       | 1337.5317     | 35.2 to 35.8   | No MS2                      |
| 5-7-1-1   | NK13     | 4155.6306  | 3      | 1386.2172       | 1386.2179     | 35.1 to 35.8   | No MS2                      |
| 5-7-1-1   | NK08     | 4155.6306  | 4      | 1039.9147       | 1039.9103     | 46.9 to 48.4   | No MS2                      |
| 6-7-0-1   | NK13     | 4212.6521  | 3      | 1405.2244       | 1405.2238     | 35.0 to 35.7   | Peptide+GlcNAc not detected |
| 6-7-1-1   | NK13     | 4358.71    | 4      | 1090.6845       | 1090.6840     | 34.8 to 35.6   | Peptide+GlcNAc not detected |
| 6-7-1-2   | NK13     | 4649.8054  | 4      | 1163.4584       | 1163.4572     | 37.7 to 38.8   | Peptide+GlcNAc not detected |
| 6-7-1-2   | NK08     | 4649.8054  | 4      | 1163.4584       | 1163.4523     | 37.8 to 42.9   | No MS2                      |
| 6-7-2-2   | NK13     | 4795.8633  | 4      | 1199.9728       | 1199.9705     | 41.2 to 42.8   | Peptide+GlcNAc not detected |
| 7-8-1-1   | NK13     | 4723.8422  | 4      | 1181.9676       | 1181.9636     | 34.3 to 34.9   | Peptide+GlcNAc not detected |
| 7-8-1-2   | NK13     | 5014.9376  | 4      | 1254.7414       | 1254.7463     | 37.3 to 38.2   | Peptide+GlcNAc not detected |
| 8-9-0-1   | NK13     | 4942.9165  | 4      | 1236.7361       | 1236.7296     | 33.7 to 34.6   | Peptide+GlcNAc not detected |
| 8-9-1-1   | NK13     | 5088.9744  | 4      | 1273.2506       | 1273.2443     | 33.7 to 34.6   | No MS2                      |
| 8-9-2-2   | NK13     | 5526.1277  | 4      | 1382.5389       | 1382.5342     | 39.6 to 40.5   | No MS2                      |

**CD16a N45 Peptide 2: FHNESLISSQASSY**

| Glycoform | Data set | Exact mass | Charge | Calculated mass | Observed mass | Retention time | Comment                     |
|-----------|----------|------------|--------|-----------------|---------------|----------------|-----------------------------|
| 10-11-1-4 | NK08     | 6983.719   | 4      | 1746.9368       | 1746.9267     | 37.2 to 38.7   | Annotated                   |
| 10-11-1-4 | NK13     | 6983.719   | 4      | 1746.9368       | 1746.9388     | 50.9 to 52.0   | Peptide+GlcNAc not detected |

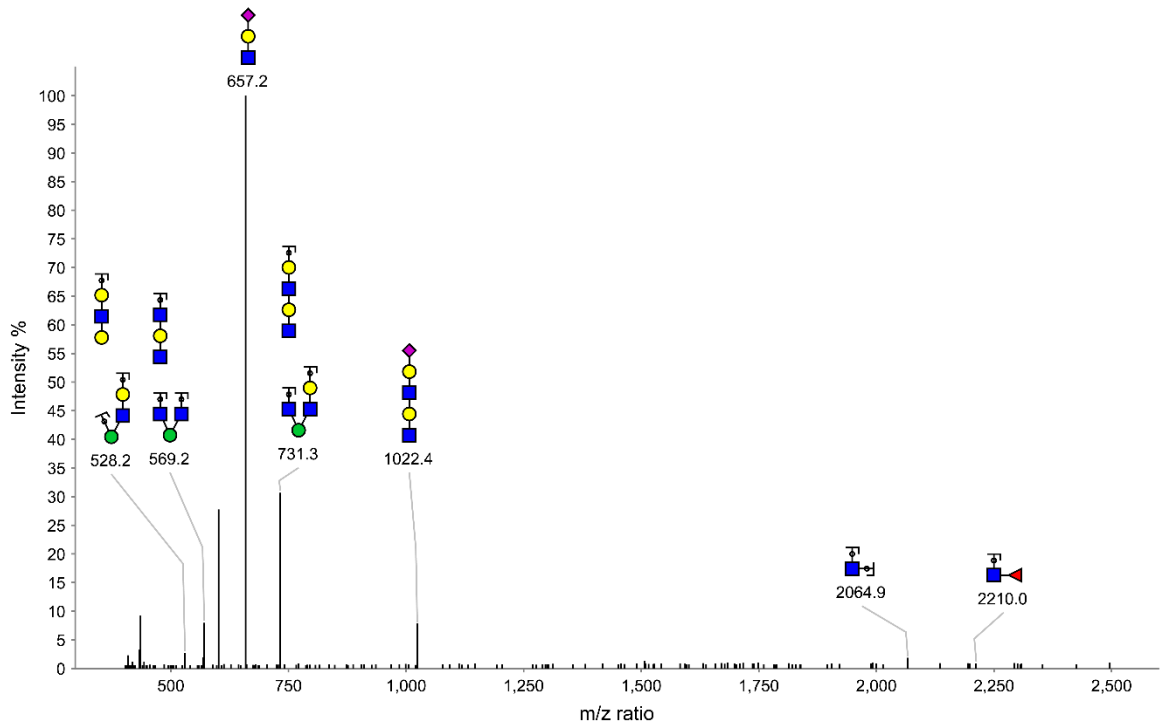

**CD16a N74 Peptide 1: RCQTNLSTLSDPVQLE+IAM**

| Glycoform | Data set | Exact mass | Charge | Calculated mass | Observed mass | Retention time | Comment       |
|-----------|----------|------------|--------|-----------------|---------------|----------------|---------------|
| 7-8-1-4   | NK08     | 5888.3224  | 4      | 1473.0876       | 1473.0849     | 39.8 to 44.6   | Annotated     |
| 7-8-1-4   | NK13     | 5888.3224  | 4      | 1473.0876       | 1473.0898     | 54.2 to 55.7   | Not Annotated |

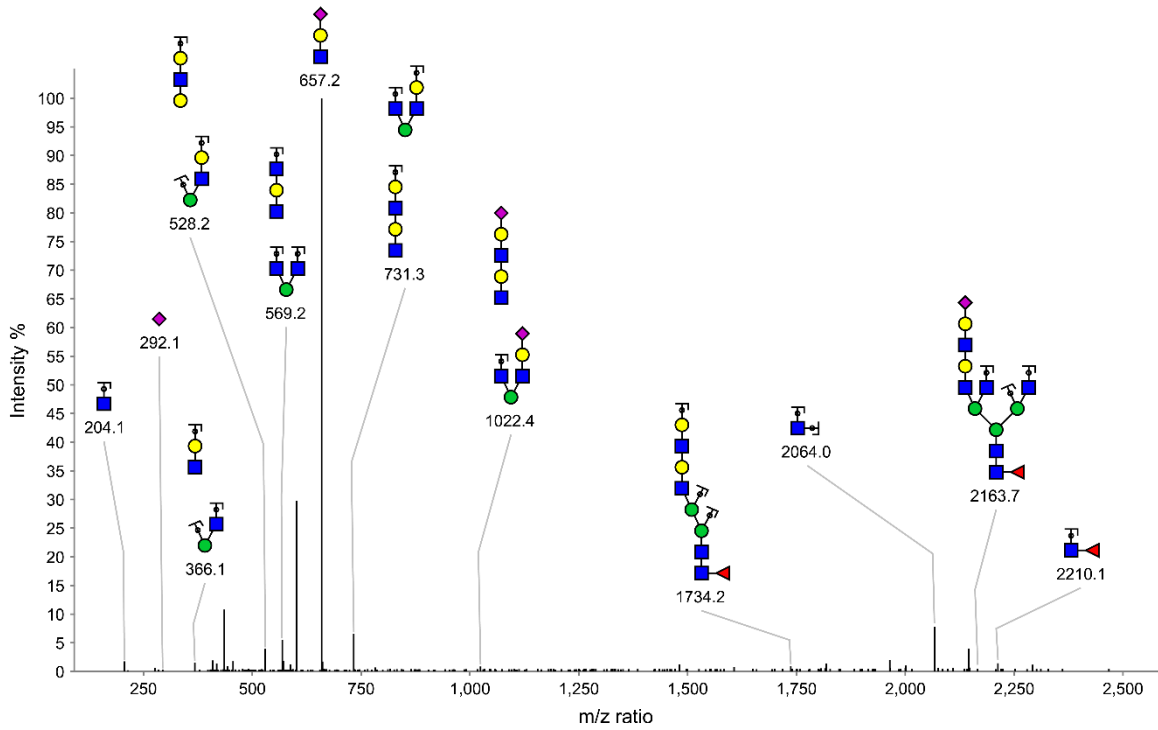

**CD16a N74 Peptide 1: RCQTNLSTLSDPVQLE+IAM**



| Glycoform | Data set | Exact mass | Charge | Calculated mass | Observed mass | Retention time | Comment   |
|-----------|----------|------------|--------|-----------------|---------------|----------------|-----------|
| 7-8-2-4   | NK13     | 6034.3803  | 4      | 1509.6021       | 1509.6090     | 41.4 to 43.0   | Annotated |

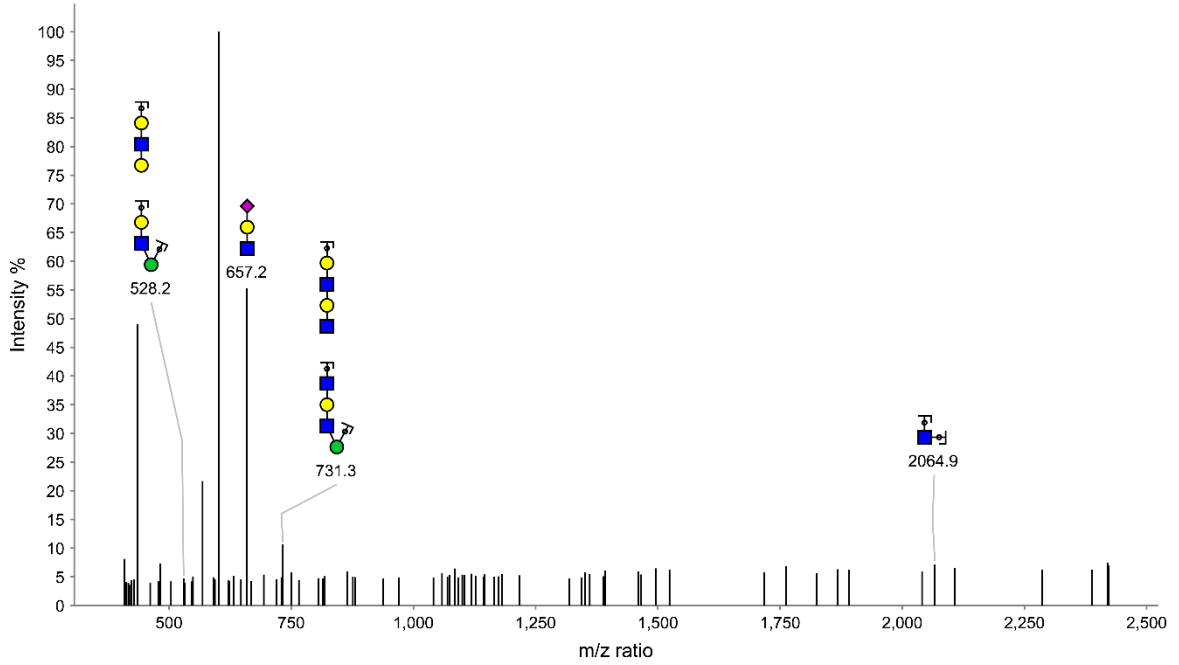

**CD16a N74 Peptide 1: RCQTNLSTLSDPVQLE+IAM**

| Glycoform | Data set | Exact mass | Charge | Calculated mass | Observed mass | Retention time | Comment               |
|-----------|----------|------------|--------|-----------------|---------------|----------------|-----------------------|
| 8-9-1-4   | NK08     | 6253.4546  | 4      | 1564.3707       | 1564.3682     | 38.4 to 41.6   | Annotated (Figure S4) |
| 8-9-1-4   | NK13     | 6253.4546  | 4      | 1564.3707       | 1564.3732     | 53.0 to 54.5   | Not Annotated         |

**CD16a N74 Peptide 1: RCQTNLSTLSDPVQLE+IAM**

| Glycoform | Data set | Exact mass | Charge | Calculated mass | Observed mass | Retention time | Comment                     |
|-----------|----------|------------|--------|-----------------|---------------|----------------|-----------------------------|
| 8-9-2-4   | NK08     | 6399.5125  | 4      | 1600.8851       | 1600.8788     | 38.7 to 41.5   | Annotated                   |
| 8-9-2-4   | NK13     | 6399.5125  | 4      | 1600.8851       | 1600.8828     | 52.9 to 53.4   | Peptide+GlcNAc not detected |

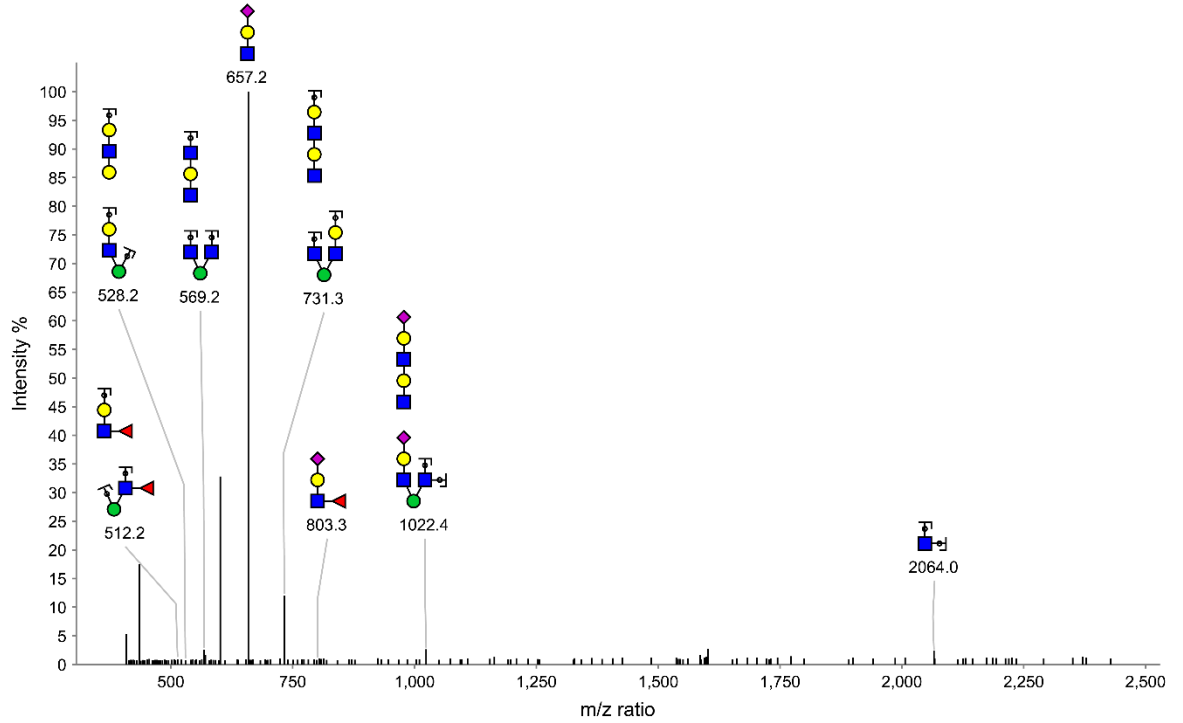

**CD16a N74 Peptide 1: RCQTNLSTLSDPVQLE+IAM**

| Glycoform | Data set | Exact mass | Charge | Calculated mass | Observed mass | Retention time | Comment       |
|-----------|----------|------------|--------|-----------------|---------------|----------------|---------------|
| 9-10-1-4  | NK08     | 6618.5868  | 4      | 1655.6537       | 1655.6469     | 37.7 to 40.6   | Annotated     |
| 9-10-1-4  | NK13     | 6618.5868  | 4      | 1655.6537       | 1655.6541     | 51.9 to 52.9   | Not Annotated |

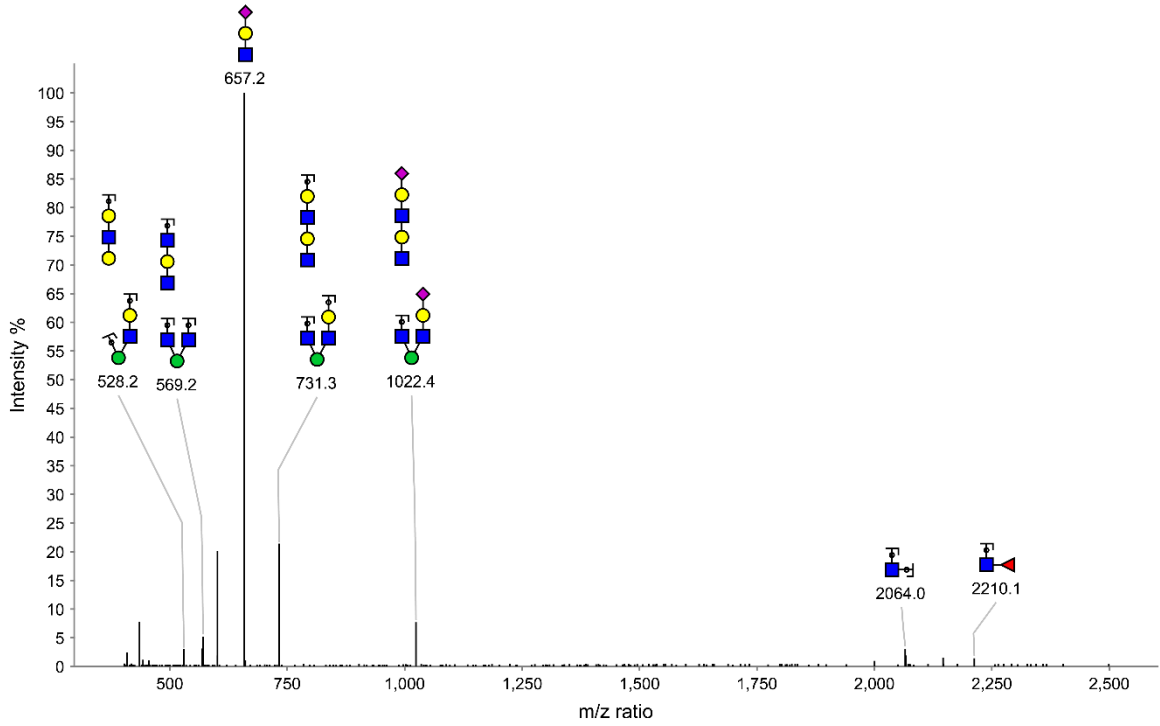

**CD16a N74 Peptide 1: RCQTNLSTLSDPVQLE+IAM**

| Glycoform | Data set | Exact mass | Charge | Calculated mass | Observed mass | Retention time | Comment                     |
|-----------|----------|------------|--------|-----------------|---------------|----------------|-----------------------------|
| 10-11-0-4 | NK13     | 6837.6611  | 5      | 1368.5392       | 1368.9533*    | 47.8 to 48.3   | No MS2                      |
| 10-11-2-4 | NK08     | 7129.7769  | 4      | 1783.4512       | 1783.4342     | 38.0 to 38.3   | No MS2                      |
| 10-11-2-4 | NK13     | 7129.7769  | 5      | 1426.9624       | 1426.9590     | 50.4 to 52.1   | Peptide+GlcNAc not detected |
| 11-12-1-4 | NK08     | 7348.8512  | 5      | 1470.7772       | 1470.7649     | 36.6 to 37.6   | Peptide+GlcNAc not detected |
| 11-12-1-4 | NK13     | 7348.8512  | 5      | 1470.7772       | 1470.7819     | 50.0 to 52.3   | Peptide+GlcNAc not detected |
| 11-12-2-4 | NK13     | 7494.9091  | 5      | 1499.9888       | 1500.0124     | 50.4 to 50.8   | Peptide+GlcNAc not detected |
| 12-13-1-4 | NK08     | 7713.9834  | 5      | 1543.8037       | 1543.7900     | 36.4 to 37.4   | Peptide+GlcNAc not detected |
| 12-13-1-4 | NK13     | 7713.9834  | 5      | 1543.8037       | 1543.8038     | 49.5 to 50.9   | Peptide+GlcNAc not detected |
| 6-7-1-3   | NK08     | 5232.0948  | 4      | 1309.0307       | 1309.0243     | 45.1 to 45.7   | Peptide+GlcNAc not detected |
| 6-7-1-3   | NK13     | 5232.0948  | 4      | 1309.0307       | 1309.0327     | 50.9 to 51.8   | Peptide+GlcNAc not detected |
| 6-7-1-4   | NK13     | 5523.1902  | 4      | 1381.8046       | 1381.8063     | 55.6 to 56.6   | Peptide+GlcNAc not detected |
| 8-9-3-4   | NK13     | 6545.5704  | 4      | 1637.3996       | 1637.4059     | 52.7 to 53.2   | Peptide+GlcNAc not detected |
| 9-10-0-4  | NK13     | 6472.5289  | 5      | 1295.5128       | 1295.5252     | 49.4 to 49.9   | No MS2                      |
| 9-10-2-4  | NK08     | 6764.6447  | 4      | 1692.1682       | 1692.1527     | 39.7 to 40.3   | No MS2                      |
| 9-10-2-4  | NK13     | 6764.6447  | 4      | 1692.1682       | 1692.1636     | 51.9 to 52.3   | Peptide+GlcNAc not detected |
| 9-10-3-4  | NK13     | 6910.7026  | 4      | 1728.6827       | 1728.6739     | 52.1 to 52.6   | No MS2                      |

**CD16a N74 Peptide 1: RCQTNLSTLSDPVQLE+IAM**

| Glycoform | Data set | Exact mass | Charge | Calculated mass | Observed mass | Retention time | Comment                     |
|-----------|----------|------------|--------|-----------------|---------------|----------------|-----------------------------|
| 10-11-1-4 | NK11     | 6215.3536  | 4      | 1554.8454       | 1554.8482     | 20.2 to 21.0   | Peptide+GlcNAc not detected |
| 10-11-1-4 | NK08     | 6215.3536  | 4      | 1554.8454       | 1554.8424     | 21.3 to 23.2   | Annotated                   |

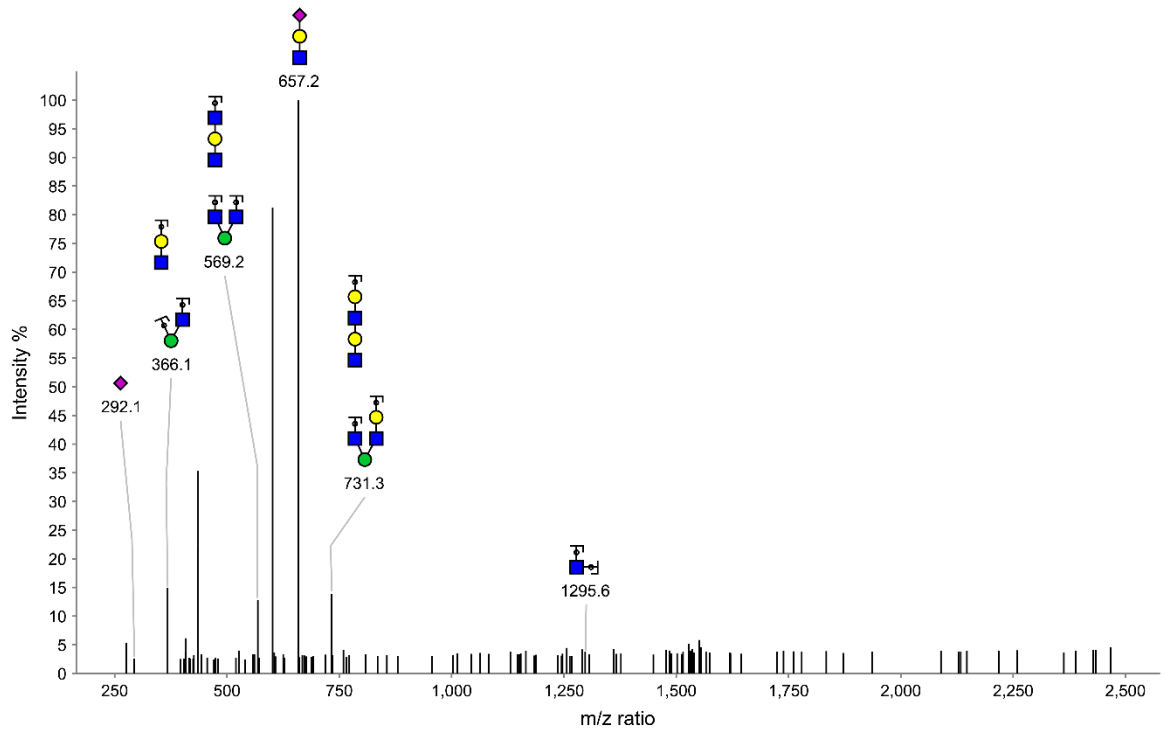

### CD16a N74 Peptide 2: RCQTNLSTL+IAM

| Glycoform | Data set | Exact mass | Charge | Calculated mass | Observed mass | Retention time | Comment       |
|-----------|----------|------------|--------|-----------------|---------------|----------------|---------------|
| 7-8-1-4   | NK11     | 5119.957   | 4      | 1280.9963       | 1280.9972     | 21.4 to 22.7   | Annotated     |
| 7-8-1-4   | NK08     | 5119.957   | 4      | 1280.9963       | 1280.9974     | 22.6 to 24.7   | Not Annotated |

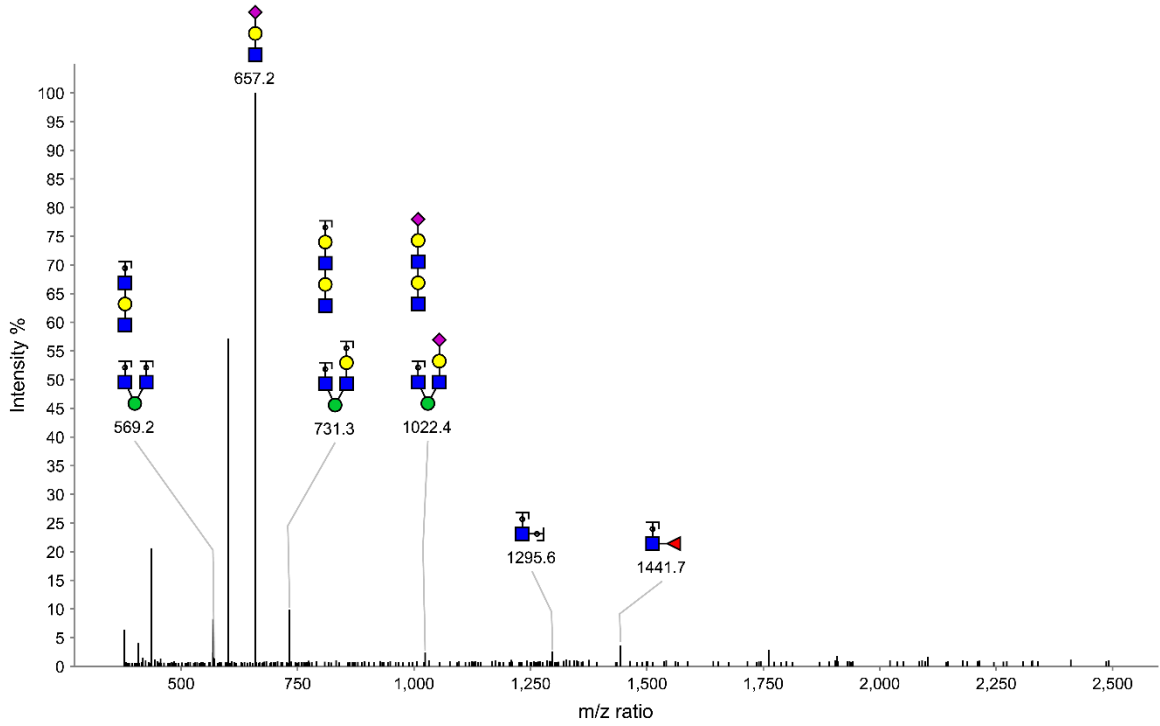

**CD16a N74 Peptide 2: RCQTNLSTL+IAM**

| Glycoform | Data set | Exact mass | Charge | Calculated mass | Observed mass | Retention time | Comment       |
|-----------|----------|------------|--------|-----------------|---------------|----------------|---------------|
| 8-9-1-4   | NK11     | 5485.0892  | 4      | 1372.2793       | 1372.2807     | 20.5 to 22.5   | Not Annotated |
| 8-9-1-4   | NK08     | 5485.0892  | 4      | 1372.2793       | 1372.2824     | 21.8 to 24.9   | Annotated     |

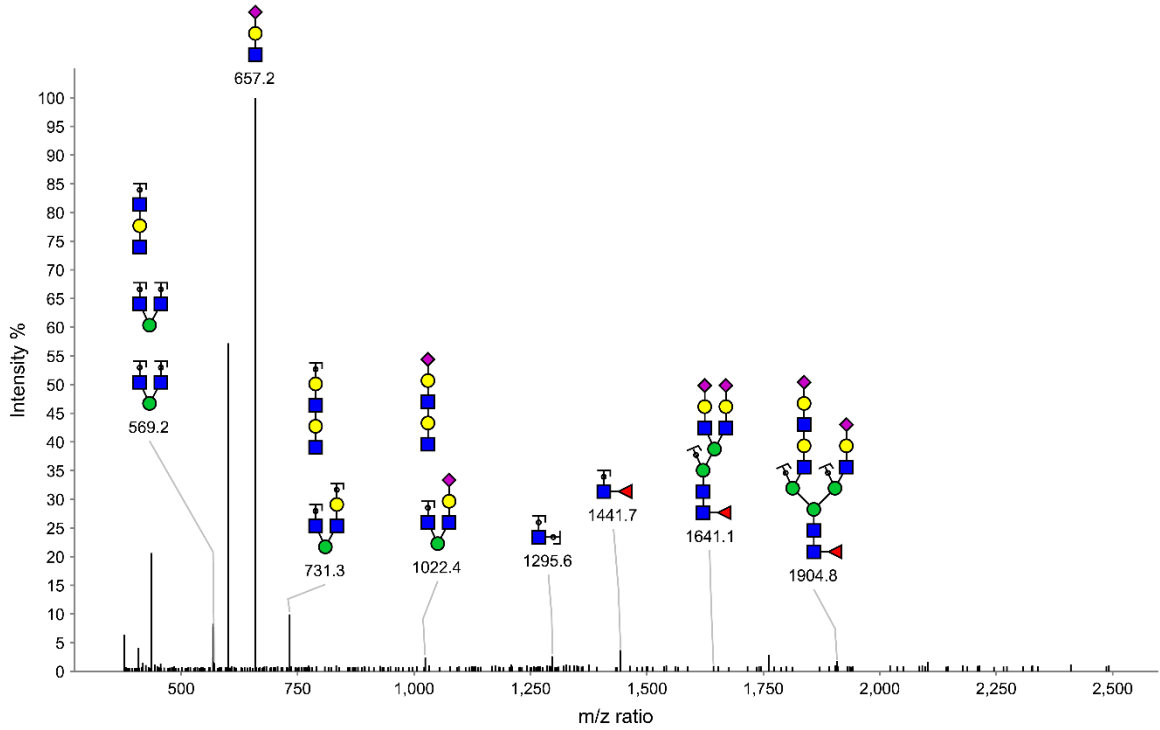

**CD16a N74 Peptide 2: RCQTNLSTL+IAM**



| Glycoform | Data set | Exact mass | Charge | Calculated mass | Observed mass | Retention time | Comment       |
|-----------|----------|------------|--------|-----------------|---------------|----------------|---------------|
| 9-10-1-4  | NK11     | 5850.2214  | 4      | 1463.5624       | 1463.5617     | 20.2 to 21.5   | Not Annotated |
| 9-10-1-4  | NK08     | 5850.2214  | 4      | 1463.5624       | 1463.5688     | 21.4 to 24.1   | Annotated     |

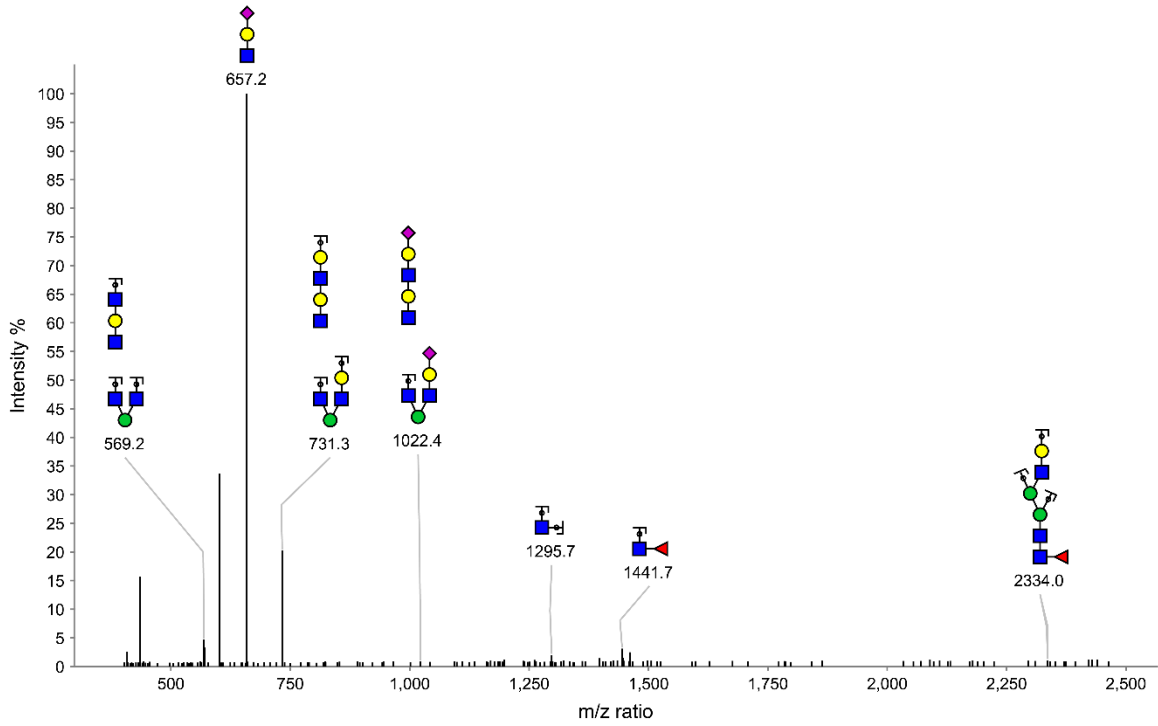

**CD16a N74 Peptide 2: RCQTNLSTL+IAM**

| Glycoform | Data set | Exact mass | Charge | Calculated mass | Observed mass | Retention time | Comment                     |
|-----------|----------|------------|--------|-----------------|---------------|----------------|-----------------------------|
| 10-11-2-4 | NK08     | 6361.4115  | 4      | 1591.3599       | 1591.3402     | 21.8 to 22.5   | No MS2                      |
| 11-12-1-4 | NK08     | 6580.4858  | 4      | 1646.1285       | 1646.1280     | 20.9 to 22.0   | Peptide+GlcNAc not detected |
| 6-7-1-4   | NK11     | 4754.8248  | 4      | 1189.7132       | 1189.7125     | 22.0 to 23.4   | Peptide+GlcNAc not detected |
| 8-9-2-4   | NK08     | 5631.1471  | 4      | 1408.7938       | 1408.7905     | 22.1 to 22.8   | Peptide+GlcNAc not detected |
| 9-10-2-4  | NK11     | 5996.2793  | 4      | 1500.0768       | 1500.3249*    | 20.2 to 21.8   | No MS2                      |
| 9-10-2-4  | NK08     | 5996.2793  | 4      | 1500.0768       | 1500.0737     | 21.4 to 22.2   | Peptide+GlcNAc not detected |

**CD16a N74 Peptide 2: RCQTNLSTL+IAM**

| Glycoform | Data set | Exact mass | Charge | Calculated mass | Observed mass | Retention time | Comment       |
|-----------|----------|------------|--------|-----------------|---------------|----------------|---------------|
| 4-5-1-1   | NK08     | 2965.1803  | 3      | 989.4004        | 989.4038      | 11.4 to 25.8   | Not Annotated |
| 4-5-1-1   | NK12     | 2965.1803  | 3      | 989.4004        | 989.3992      | 13.3 to 15.1   | Not Annotated |
| 4-5-1-1   | NK13     | 2965.1803  | 3      | 989.4004        | 989.4003      | 13.3 to 20.9   | Annotated     |

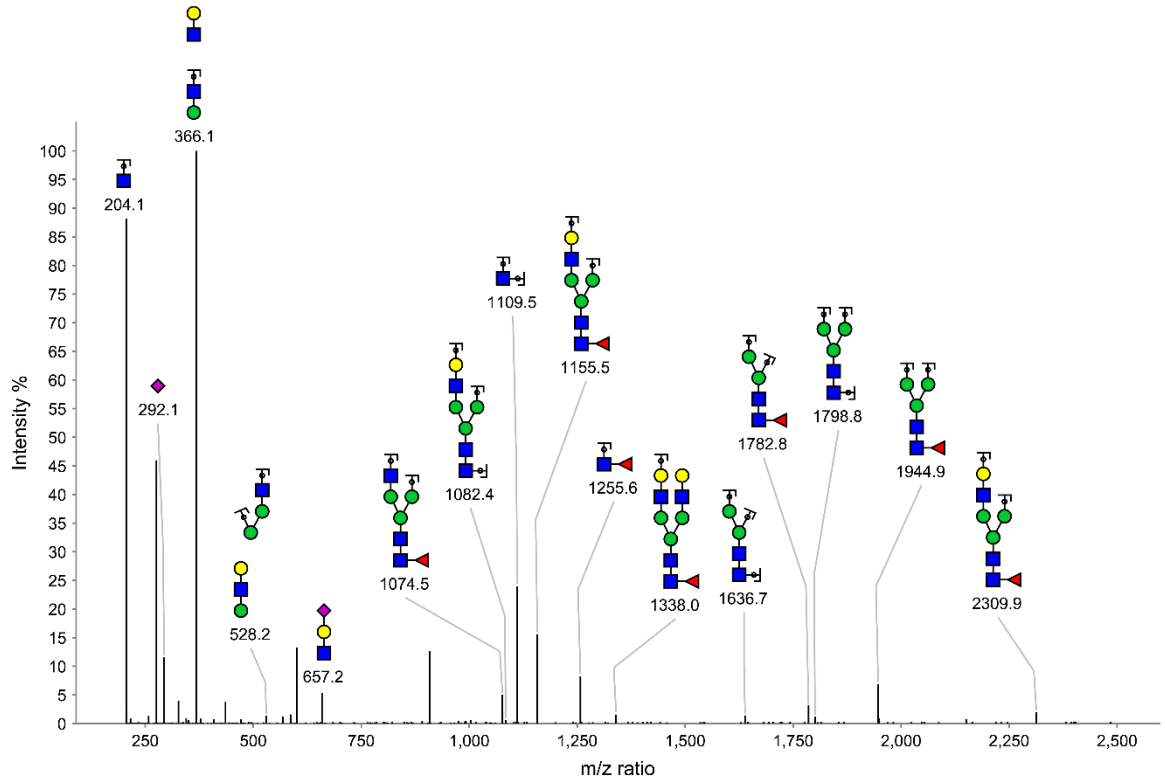

**CD16a N162 (V158) Peptide 1: VGSKNVSSSE**

| Glycoform | Data set | Exact mass | Charge | Calculated mass | Observed mass | Retention time | Comment       |
|-----------|----------|------------|--------|-----------------|---------------|----------------|---------------|
| 4-5-1-2   | NK08     | 3256.2757  | 3      | 1086.4322       | 1086.4363     | 11.0 to 17.0   | No MS2        |
| 4-5-1-2   | NK12     | 3256.2757  | 3      | 1086.4322       | 1086.4320     | 14.3 to 16.3   | Annotated     |
| 4-5-1-2   | NK13     | 3256.2757  | 3      | 1086.4322       | 1086.4308     | 15.1 to 17.0   | Not Annotated |

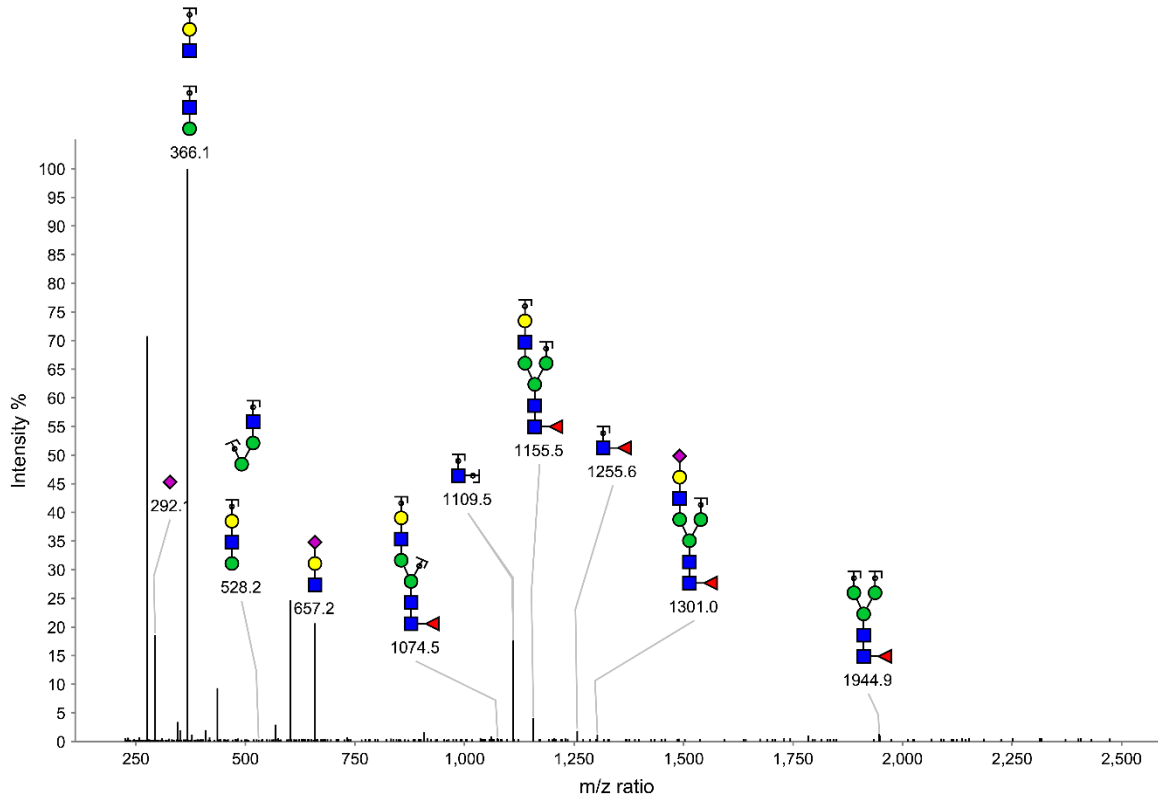

**CD16a N162 (V158) Peptide 1: VGSKNVSSSE**

| Glycoform | Data set | Exact mass | Charge | Calculated mass | Observed mass | Retention time | Comment   |
|-----------|----------|------------|--------|-----------------|---------------|----------------|-----------|
| 5-6-1-1   | NK12     | 3330.3125  | 3      | 1111.1112       | 1111.1118     | 12.9 to 14.9   | No MS2    |
| 5-6-1-1   | NK13     | 3330.3125  | 3      | 1111.1112       | 1111.1102     | 13.4 to 18.2   | Annotated |

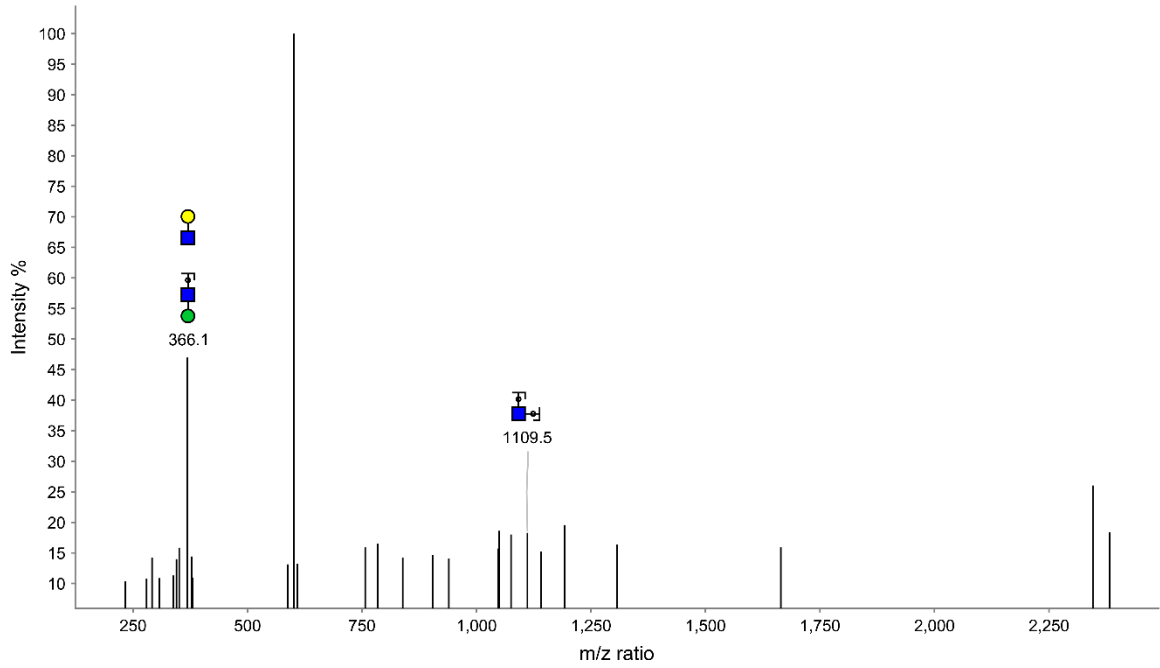

**CD16a N162 (V158) Peptide 1: VGSKNVSSSE**

| Glycoform | Data set | Exact mass | Charge | Calculated mass | Observed mass | Retention time | Comment   |
|-----------|----------|------------|--------|-----------------|---------------|----------------|-----------|
| 5-6-1-2   | NK12     | 3621.4079  | 3      | 1208.1430       | 1208.1430     | 14.7 to 16.1   | No MS2    |
| 5-6-1-2   | NK13     | 3621.4079  | 3      | 1208.1430       | 1208.1428     | 15.5 to 16.5   | Annotated |

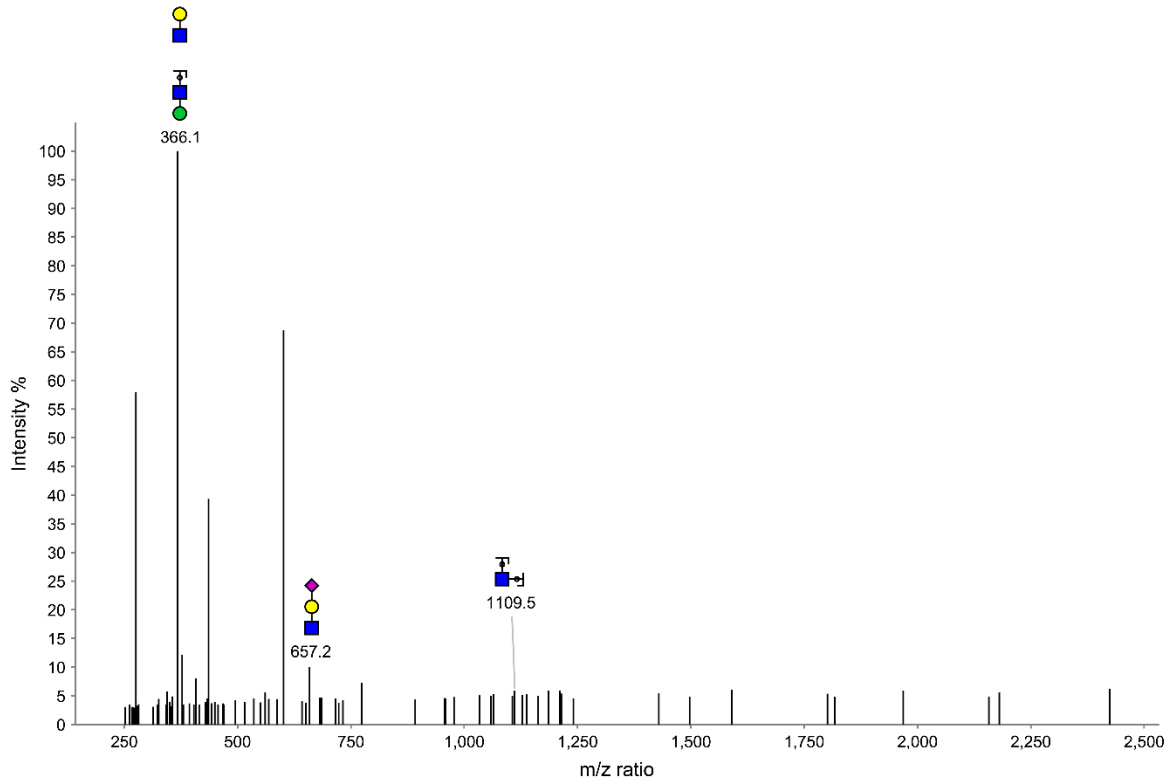

**CD16a N162 (V158) Peptide 1: VGSKNVSE**

| Glycoform | Data set | Exact mass | Charge | Calculated mass | Observed mass | Retention time | Comment |
|-----------|----------|------------|--------|-----------------|---------------|----------------|---------|
| 3-6-1-1   | NK13     | 2924.1537  | 3      | 975.7249        | 975.7231      | 13.4 to 14.4   | No MS2  |
| 4-5-2-1   | NK12     | 3111.2382  | 3      | 1038.0864       | 1038.0863     | 12.8 to 13.4   | No MS2  |

**CD16a N162 (V158) Peptide 1: VGSKNVSSE**

| Glycoform | Data set | Exact mass | Charge | Calculated mass | Observed mass | Retention time | Comment               |
|-----------|----------|------------|--------|-----------------|---------------|----------------|-----------------------|
| 2-3-1-0   | NK08     | 2430.0578  | 3      | 811.0263        | 811.0278      | 63.8 to 64.6   | Annotated (Figure S4) |

**CD16a N162 (V158) Peptide 2: CRGLVGSKNVSSE+IAM**



| Glycoform | Data set | Exact mass | Charge | Calculated mass | Observed mass | Retention time | Comment               |
|-----------|----------|------------|--------|-----------------|---------------|----------------|-----------------------|
| 2-5-0-0   | NK08     | 2608.1055  | 3      | 870.3755        | 870.3775      | 63.5 to 64.7   | Annotated (Figure S4) |

**CD16a N162 (V158) Peptide 2: CRGLVGSKNVSSE+IAM**

| Glycoform | Data set | Exact mass | Charge | Calculated mass | Observed mass | Retention time | Comment   |
|-----------|----------|------------|--------|-----------------|---------------|----------------|-----------|
| 2-6-0-0   | NK08     | 2770.1583  | 3      | 924.3931        | 924.3922      | 62.9 to 64.5   | Annotated |

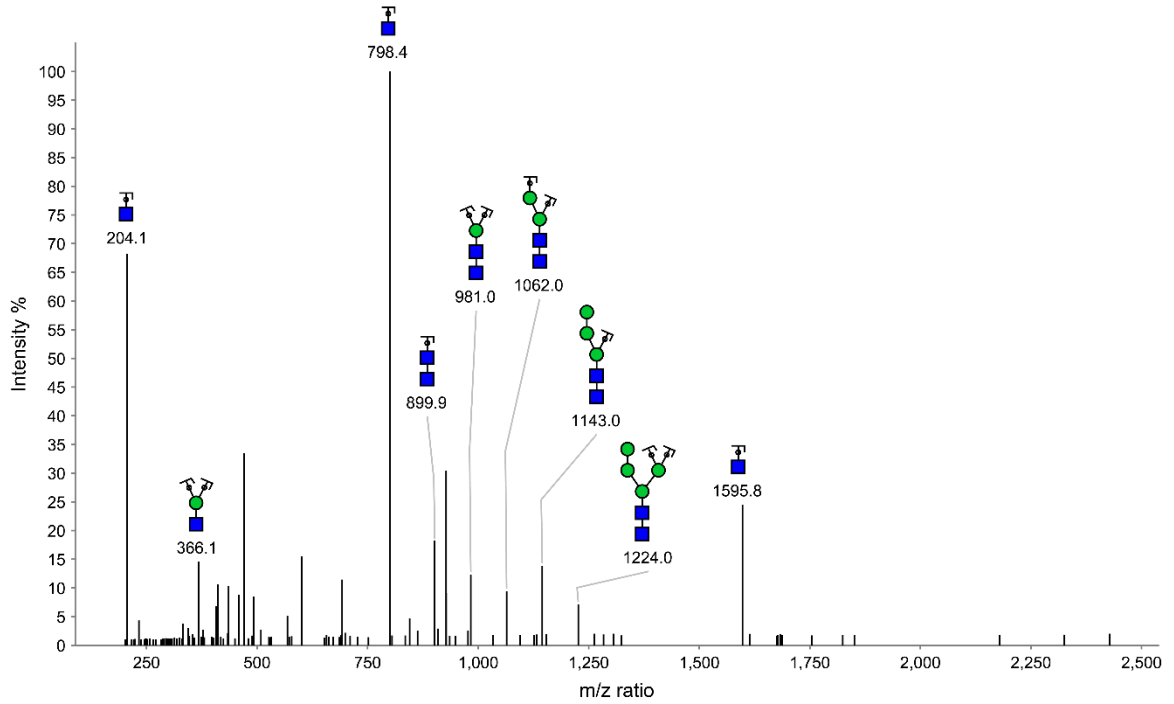

**CD16a N162 (V158) Peptide 2: CRGLVGSKNVSSE+IAM**

| Glycoform | Data set | Exact mass | Charge | Calculated mass | Observed mass | Retention time | Comment               |
|-----------|----------|------------|--------|-----------------|---------------|----------------|-----------------------|
| 3-4-1-1   | NK13     | 3086.2854  | 3      | 1029.7688       | 1029.7667     | 18.6 to 20.5   | Not Annotated         |
| 3-4-1-1   | NK08     | 3086.2854  | 3      | 1029.7688       | 1029.7691     | 56.2 to 62.1   | Annotated (Figure S4) |

**CD16a N162 (V158) Peptide 2: CRGLVGSKNVSSE+IAM**

| Glycoform | Data set | Exact mass | Charge | Calculated mass | Observed mass | Retention time | Comment       |
|-----------|----------|------------|--------|-----------------|---------------|----------------|---------------|
| 3-5-1-1   | NK13     | 3248.3382  | 3      | 1083.7864       | 1083.7827     | 18.2 to 21.2   | Annotated     |
| 3-5-1-1   | NK08     | 3248.3382  | 3      | 1083.7864       | 1083.7879     | 56.2 to 61.2   | Not Annotated |

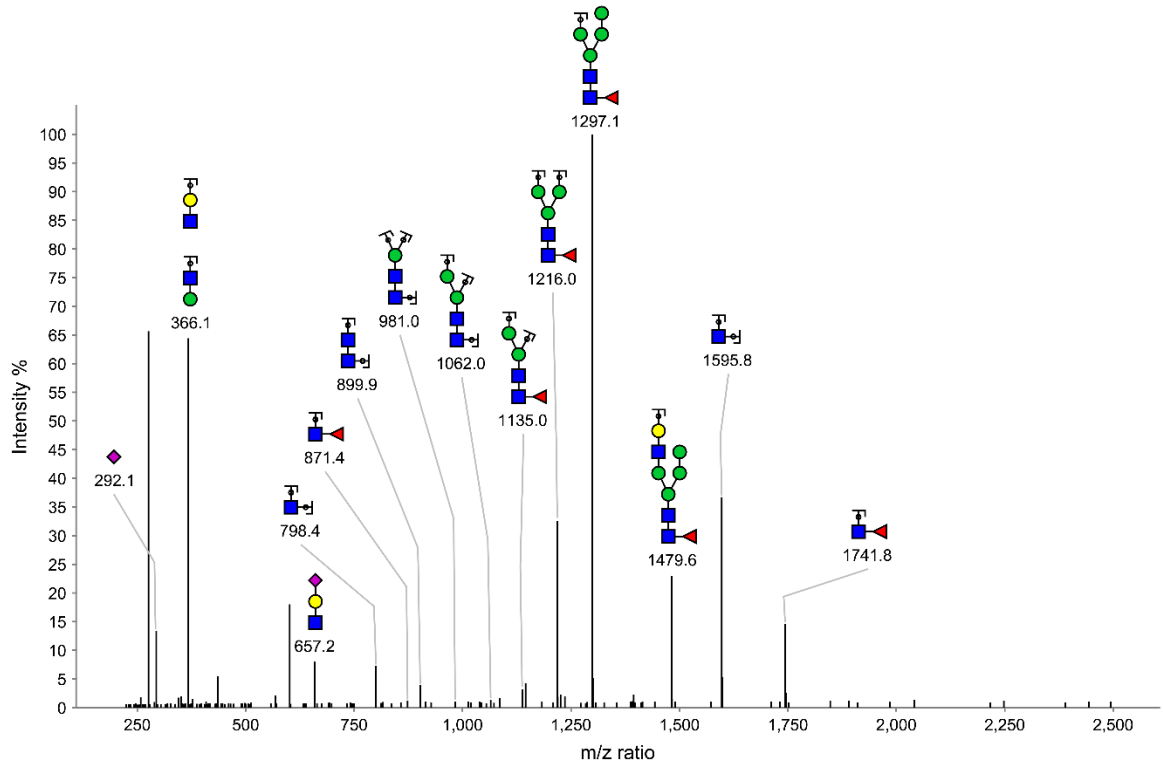

**CD16a N162 (V158) Peptide 2: CRGLVGSKNVSS+IAM**

| Glycoform | Data set | Exact mass | Charge | Calculated mass | Observed mass | Retention time | Comment   |
|-----------|----------|------------|--------|-----------------|---------------|----------------|-----------|
| 3-6-0-1   | NK13     | 3264.3331  | 3      | 1089.1180       | 1089.1158     | 18.4 to 20.1   | Annotated |

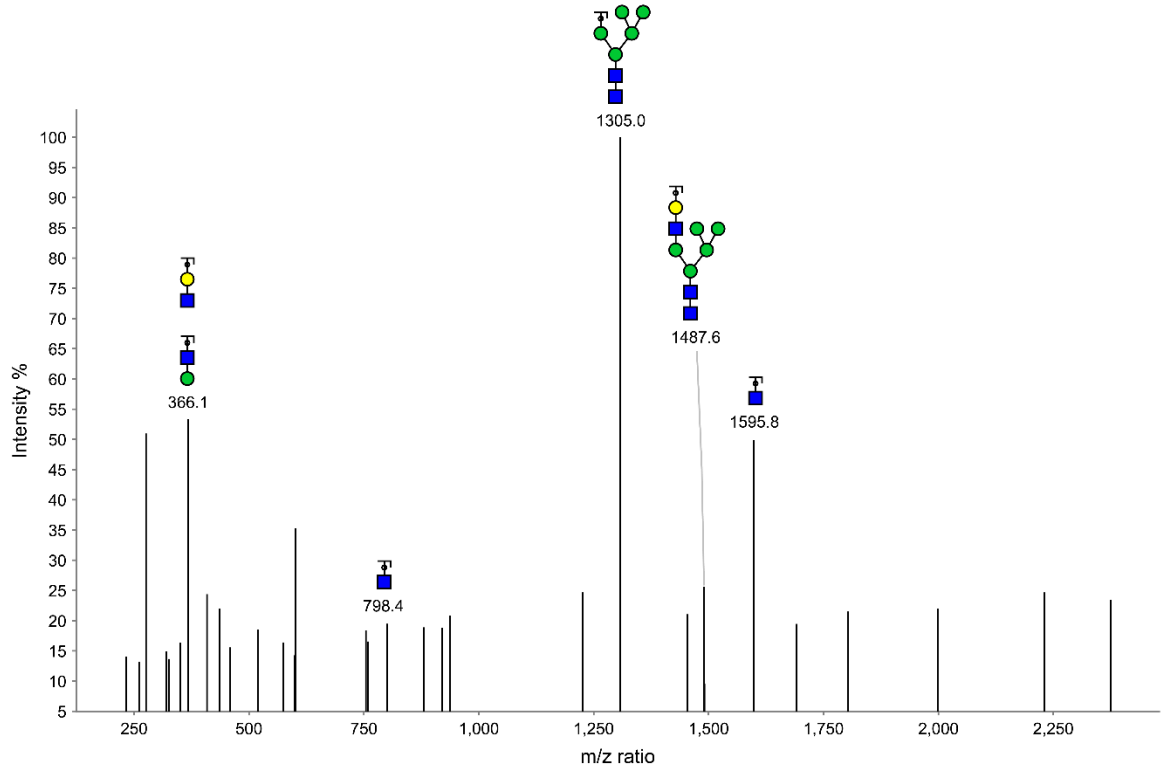

**CD16a N162 (V158) Peptide 2: CRGLVGSKNVSSE+IAM**

| Glycoform | Data set | Exact mass | Charge | Calculated mass | Observed mass | Retention time | Comment   |
|-----------|----------|------------|--------|-----------------|---------------|----------------|-----------|
| 3-6-1-1   | NK13     | 3410.391   | 3      | 1137.8040       | 1137.8009     | 18.7 to 19.6   | Annotated |
| 3-6-1-1   | NK08     | 3410.391   | 3      | 1137.8040       | 1137.8051     | 57.4 to 60.5   | No MS2    |

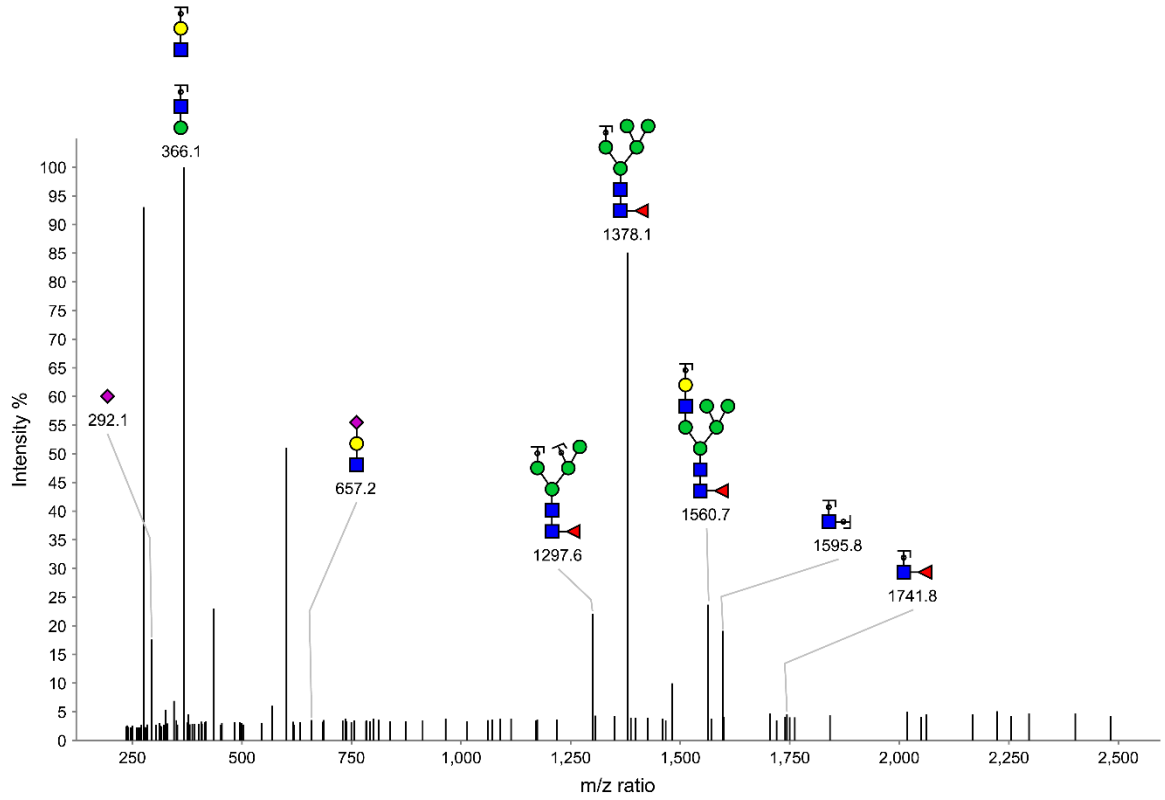

**CD16a N162 (V158) Peptide 2: CRGLVGSKNVSS+IAM**

| Glycoform | Data set | Exact mass | Charge | Calculated mass | Observed mass | Retention time | Comment              |
|-----------|----------|------------|--------|-----------------|---------------|----------------|----------------------|
| 4-5-1-1   | NK13     | 3451.4176  | 3      | 1151.4795       | 1151.4757     | 18.6 to 20.1   | Not Annotated        |
| 4-5-1-1   | NK08     | 3451.4176  | 3      | 1151.4795       | 1151.4806     | 53.9 to 61.3   | Annotated (Figure 2) |

**CD16a N162 (V158) Peptide 2: CRGLVGSKNVSSE+IAM**

| Glycoform | Data set | Exact mass | Charge | Calculated mass | Observed mass | Retention time | Comment       |
|-----------|----------|------------|--------|-----------------|---------------|----------------|---------------|
| 4-5-1-2   | NK13     | 3742.513   | 3      | 1248.5113       | 1248.5091     | 21.1 to 23.6   | Not Annotated |
| 4-5-1-2   | NK08     | 3742.513   | 3      | 1248.5113       | 1248.5142     | 41.0 to 47.7   | Annotated     |

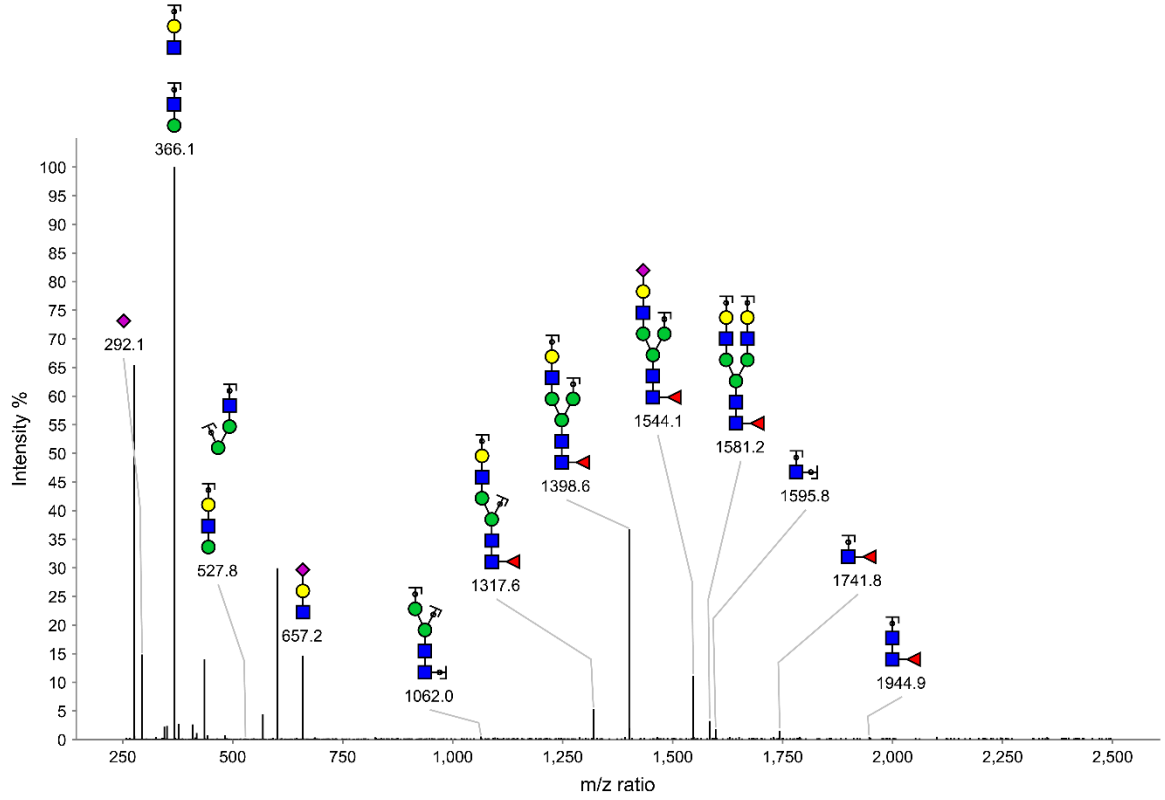

**CD16a N162 (V158) Peptide 2: CRGLVGSKNVSSE+IAM**



| Glycoform | Data set | Exact mass | Charge | Calculated mass | Observed mass | Retention time | Comment   |
|-----------|----------|------------|--------|-----------------|---------------|----------------|-----------|
| 4-5-2-0   | NK13     | 3306.3801  | 3      | 1103.1337       | 1103.1294     | 16.3 to 18.3   | Annotated |

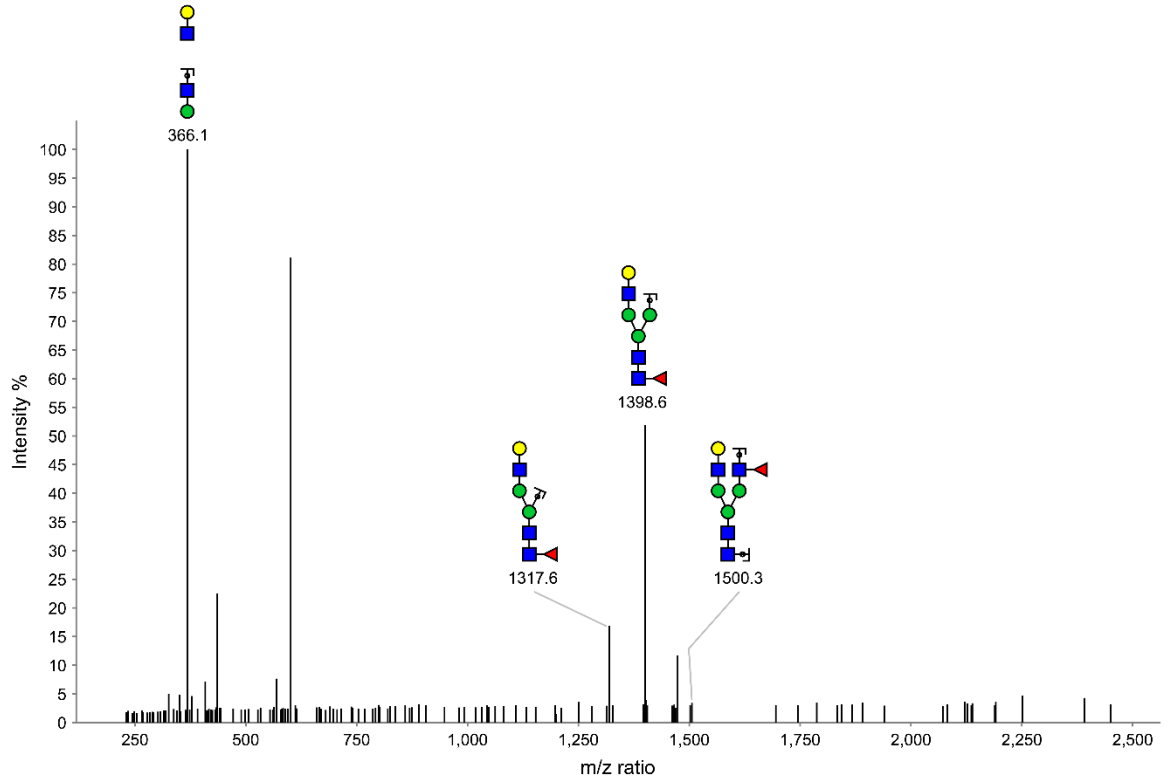

**CD16a N162 (V158) Peptide 2: CRGLVGSKNVSS+IAM**

| Glycoform | Data set | Exact mass | Charge | Calculated mass | Observed mass | Retention time | Comment                     |
|-----------|----------|------------|--------|-----------------|---------------|----------------|-----------------------------|
| 5-6-1-1   | NK13     | 3816.5498  | 3      | 1273.1903       | 1273.1878     | 16.5 to 20.1   | Annotated                   |
| 5-6-1-1   | NK08     | 3816.5498  | 3      | 1273.1903       | 1273.1914     | 55.1 to 58.4   | Peptide+GlcNAc not detected |

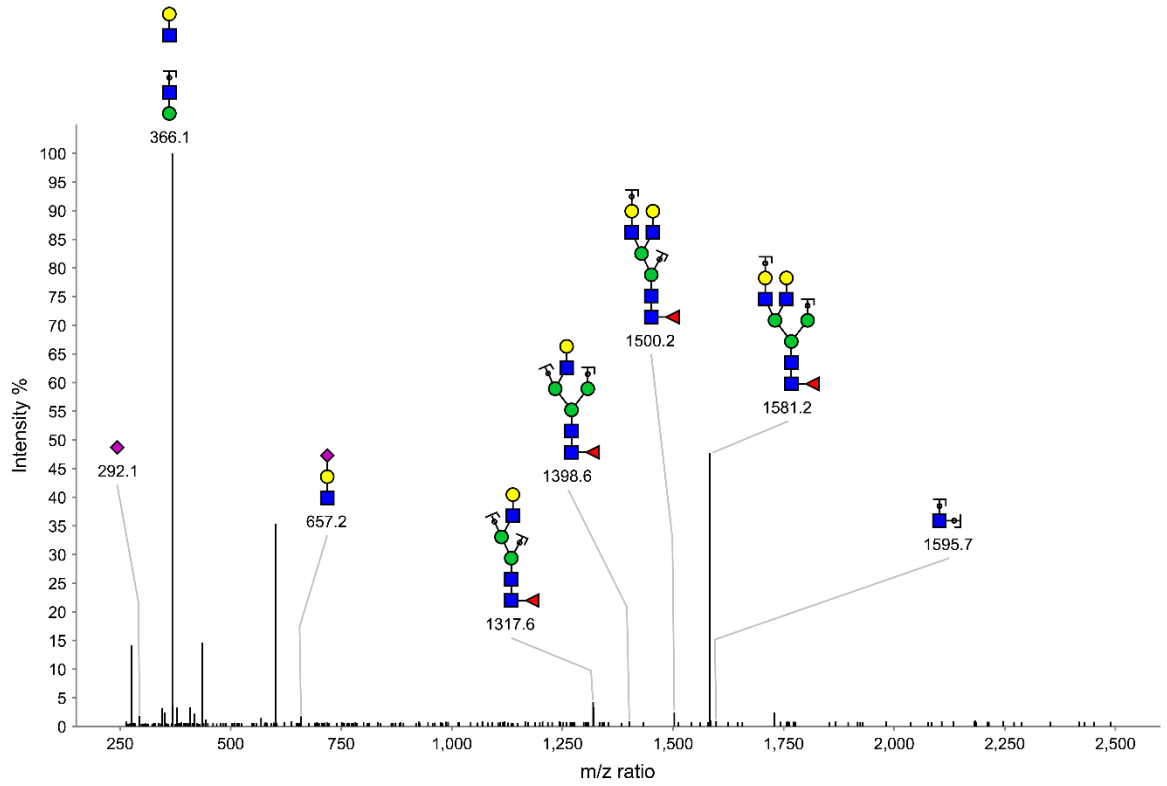

**CD16a N162 (V158) Peptide 2: CRGLVGSKNVSS+IAM**

| Glycoform | Data set | Exact mass | Charge | Calculated mass | Observed mass | Retention time | Comment   |
|-----------|----------|------------|--------|-----------------|---------------|----------------|-----------|
| 5-6-1-2   | NK13     | 4107.6452  | 3      | 1370.2221       | 1370.2218     | 20.6 to 22.3   | Annotated |

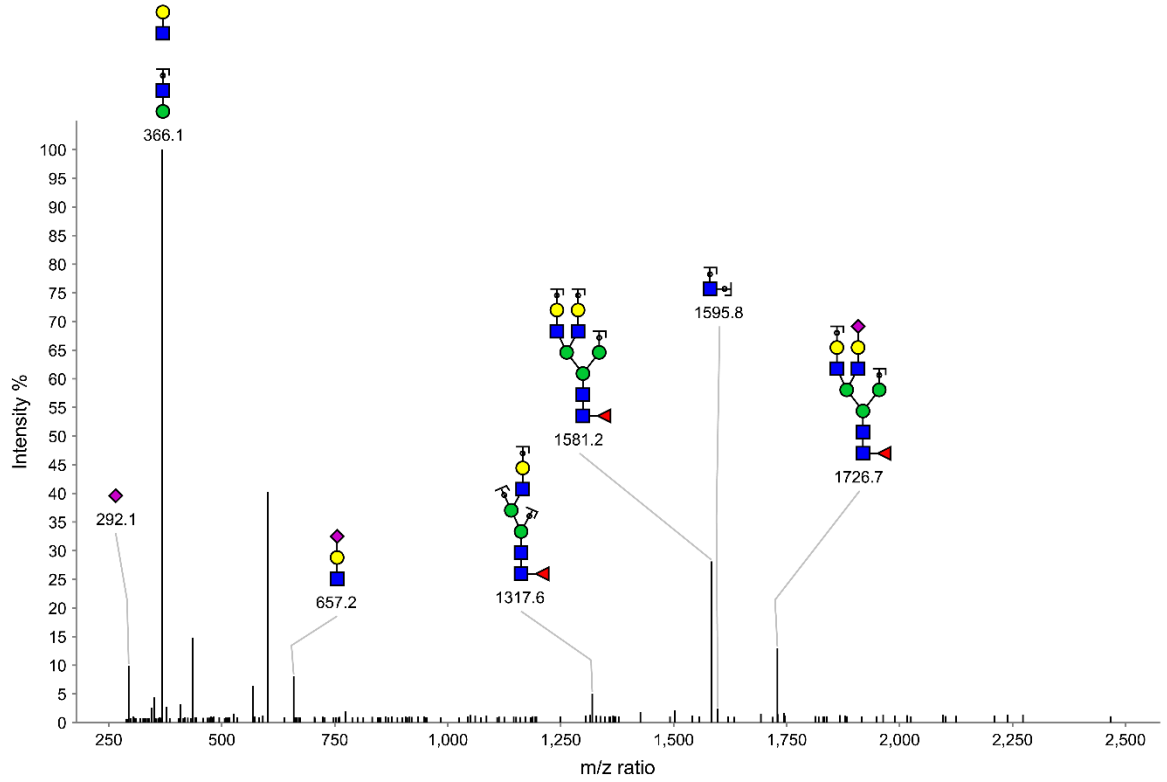

**CD16a N162 (V158) Peptide 2: CRGLVGSKNVSS+IAM**

| Glycoform | Data set | Exact mass | Charge | Calculated mass | Observed mass | Retention time | Comment                     |
|-----------|----------|------------|--------|-----------------|---------------|----------------|-----------------------------|
| 2-7-0-0   | NK08     | 2932.2111  | 3      | 978.4107        | 978.4079      | 63.4 to 63.8   | Peptide+GlcNAc not detected |
| 2-8-0-0   | NK08     | 3094.2639  | 3      | 1032.4283       | 1032.4300     | 63.4 to 63.8   | Peptide+GlcNAc not detected |
| 3-4-0-1   | NK08     | 2940.2275  | 3      | 981.0828        | 981.0721      | 56.5 to 59.9   | Peptide+GlcNAc not detected |
| 3-5-0-1   | NK08     | 3102.2803  | 3      | 1035.1004       | 1035.1012     | 56.3 to 60.9   | Peptide+GlcNAc not detected |
| 3-5-2-1   | NK13     | 3394.3961  | 3      | 1132.4724       | 1132.4701     | 21.2 to 21.8   | Peptide+GlcNAc not detected |
| 3-6-1-0   | NK08     | 3119.2956  | 3      | 1040.7722       | 1040.7655     | 58.6 to 59.8   | No MS2                      |
| 4-5-1-0   | NK13     | 3160.3222  | 3      | 1054.4477       | 1054.4453     | 15.8 to 17.8   | No MS2                      |
| 4-5-2-1   | NK13     | 3597.4755  | 3      | 1200.1655       | 1200.1622     | 17.7 to 18.9   | Annotated                   |
| 4-5-2-1   | NK08     | 3597.4755  | 3      | 1200.1655       | 1200.1727     | 56.1 to 58.6   | No MS2                      |
| 5-4-0-0   | NK08     | 3055.2909  | 3      | 1019.4373       | 1019.4539     | 44.7 to 45.8   | No MS2                      |
| 5-4-1-1   | NK13     | 3492.4442  | 3      | 1165.1551       | 1165.1465     | 17.1 to 18.7   | No MS2                      |
| 5-5-1-0   | NK13     | 3363.4016  | 3      | 1122.1409       | 1122.1394     | 15.8 to 18.9   | No MS2                      |
| 5-5-1-1   | NK13     | 3654.497   | 3      | 1219.1727       | 1219.1711     | 18.8 to 19.7   | Peptide+GlcNAc not detected |
| 5-6-1-0   | NK13     | 3525.4544  | 3      | 1176.1585       | 1176.1546     | 14.7 to 18.4   | Peptide+GlcNAc not detected |
| 5-6-2-1   | NK13     | 3962.6077  | 3      | 1321.8762       | 1321.8752     | 17.8 to 18.9   | No MS2                      |
| 6-6-0-2   | NK13     | 4164.6667  | 3      | 1389.2292       | 1389.2358     | 23.5 to 24.8   | Peptide+GlcNAc not detected |
| 6-7-1-1   | NK13     | 4181.682   | 3      | 1394.9010       | 1394.8978     | 18.1 to 18.8   | No MS2                      |
| 6-7-1-2   | NK13     | 4472.7774  | 4      | 1119.2014       | 1119.2020     | 20.8 to 21.4   | No MS2                      |

**CD16a N162 (V158) Peptide 2: CRGLVGSKNVSS+IAM**

| Glycoform | Data set | Exact mass | Charge | Calculated mass | Observed mass | Retention time | Comment   |
|-----------|----------|------------|--------|-----------------|---------------|----------------|-----------|
| 4-5-1-1   | NK13     | 3598.486   | 3      | 1200.5023       | 1200.5022     | 25.6 to 26.1   | Annotated |

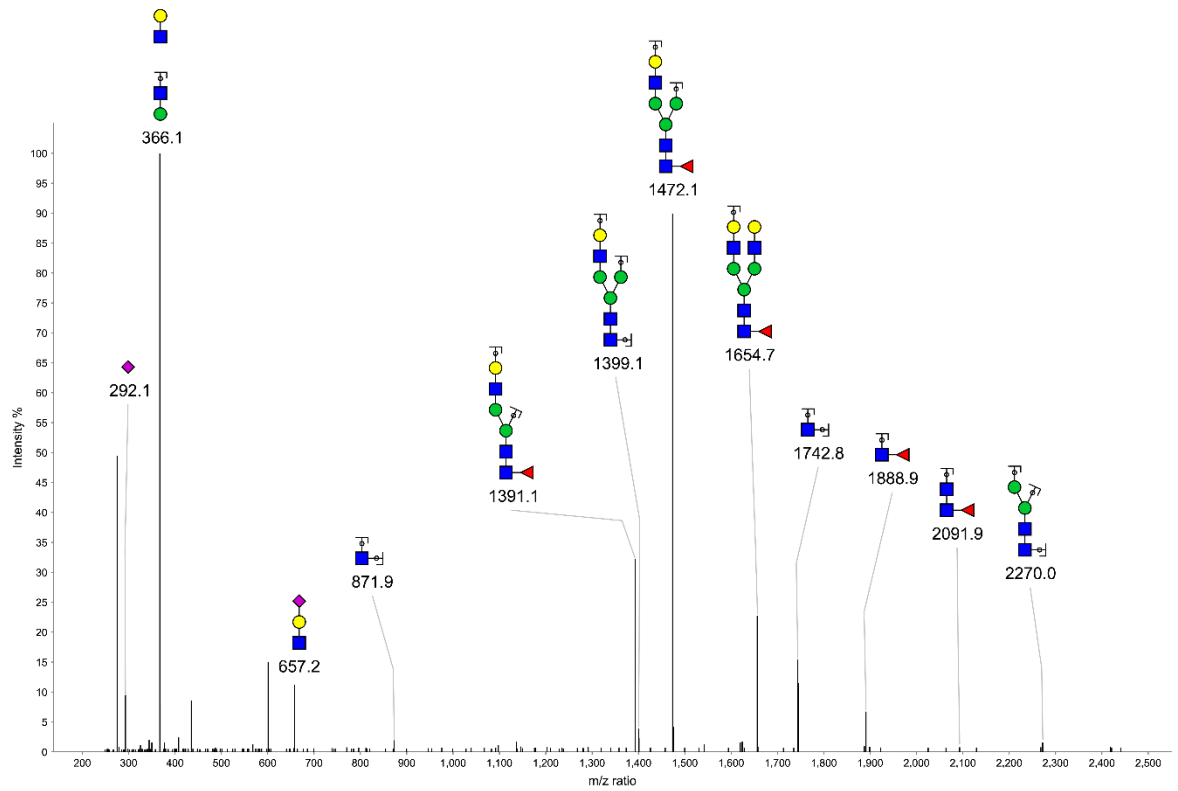

**CD16a N162 (V158) Peptide 3: FCRGLVGSKNVSS+IAM**

| Glycoform | Data set | Exact mass | Charge | Calculated mass | Observed mass | Retention time | Comment                     |
|-----------|----------|------------|--------|-----------------|---------------|----------------|-----------------------------|
| 4-5-1-2   | NK12     | 3889.5814  | 3      | 1297.5341       | 1297.5319     | 28.6 to 29.0   | Peptide+GlcNAc not detected |
| 4-6-1-1   | NK13     | 3760.5388  | 3      | 1254.5199       | 1254.5118     | 23.7 to 24.9   | No MS2                      |
| 5-5-0-1   | NK13     | 3655.5075  | 3      | 1219.5095       | 1219.5047     | 27.3 to 27.8   | Peptide+GlcNAc not detected |
| 5-6-1-2   | NK13     | 4254.7136  | 4      | 1064.6854       | 1064.6846     | 28.0 to 28.7   | Peptide+GlcNAc not detected |
| 6-7-0-2   | NK13     | 4473.7879  | 4      | 1119.4540       | 1119.4512     | 20.5 to 22.0   | Peptide+GlcNAc not detected |

**CD16a N162 (V158) Peptide 3: FCRGLVGSKNVSSSE+IAM**

| Glycoform | Data set | Exact mass | Charge | Calculated mass | Observed mass | Retention time | Comment   |
|-----------|----------|------------|--------|-----------------|---------------|----------------|-----------|
| 2-3-1-0   | NK11     | 1844.7521  | 2      | 923.3831        | 923.3839      | 12.4 to 23.1   | Annotated |

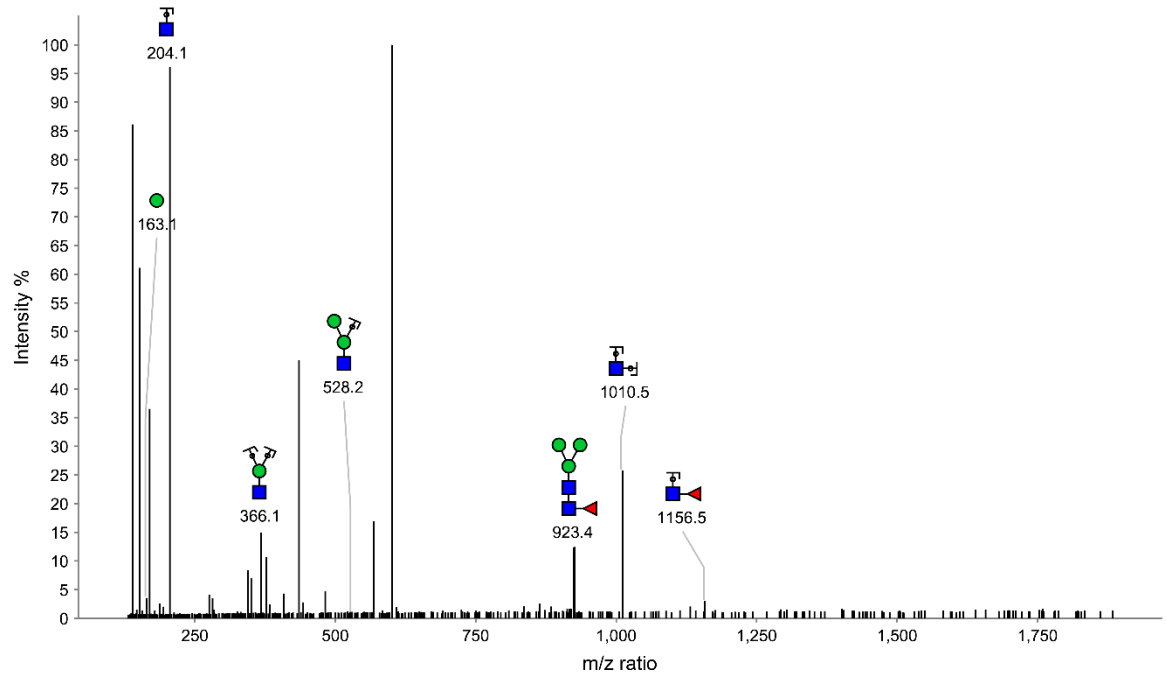

**CD16a N162 (F158) Peptide 4: GSKNVSSE**

| Glycoform | Data set | Exact mass | Charge | Calculated mass | Observed mass | Retention time | Comment   |
|-----------|----------|------------|--------|-----------------|---------------|----------------|-----------|
| 3-4-1-1   | NK11     | 2500.9797  | 2      | 1251.4969       | 1251.5017     | 9.2 to 12.4    | Annotated |

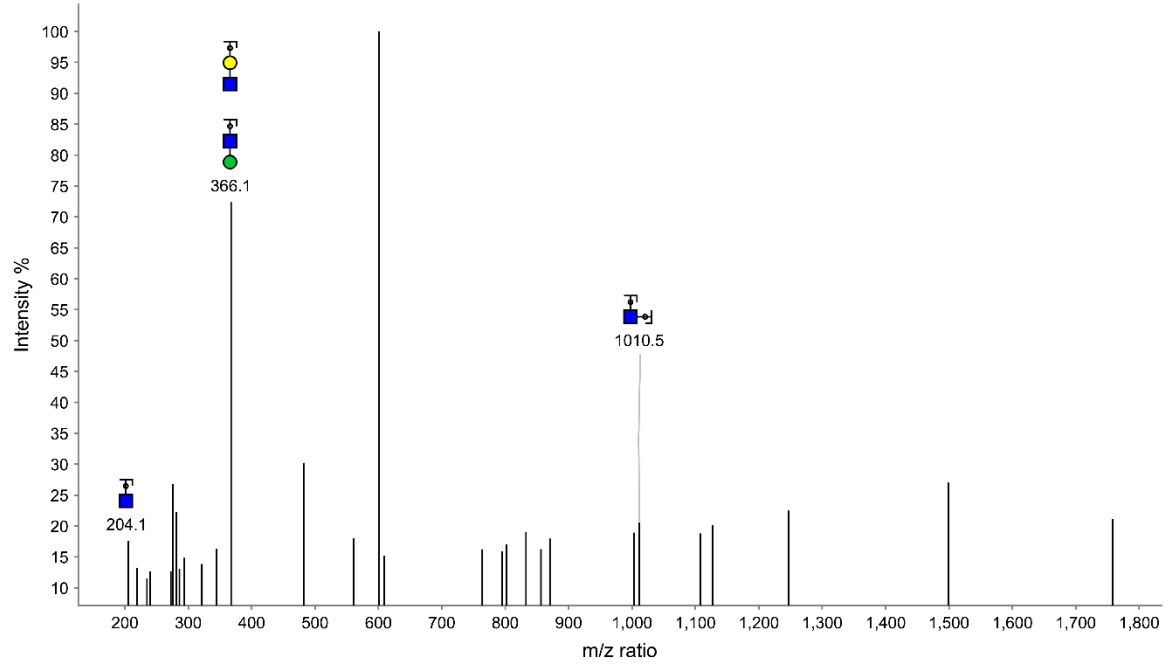

**CD16a N162 (F158) Peptide 4: GSKNVSSE**



| Glycoform | Data set | Exact mass | Charge | Calculated mass | Observed mass | Retention time | Comment               |
|-----------|----------|------------|--------|-----------------|---------------|----------------|-----------------------|
| 4-5-1-1   | NK11     | 2866.1119  | 3      | 956.3776        | 956.3784      | 8.9 to 12.5    | Annotated (Figure S4) |

**CD16a N162 (F158) Peptide 4: GSKNVSSE**

| Glycoform | Data set | Exact mass | Charge | Calculated mass | Observed mass | Retention time | Comment   |
|-----------|----------|------------|--------|-----------------|---------------|----------------|-----------|
| 4-5-1-2   | NK11     | 3157.2073  | 3      | 1053.4094       | 1053.4127     | 8.3 to 10.8    | Annotated |

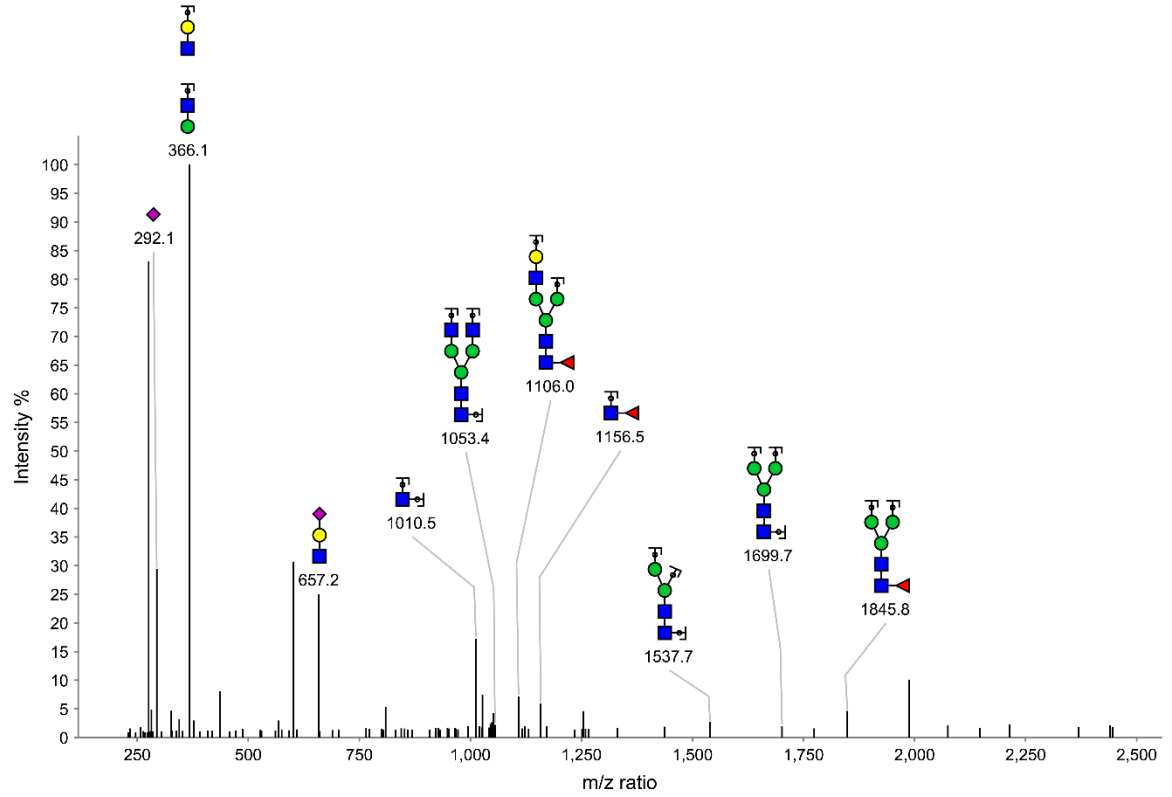

**CD16a N162 (F158) Peptide 4: GSKNVSSE**

| Glycoform | Data set | Exact mass | Charge | Calculated mass | Observed mass | Retention time | Comment                     |
|-----------|----------|------------|--------|-----------------|---------------|----------------|-----------------------------|
| 3-4-1-0   | NK09     | 2209.8843  | 3      | 737.6351        | 737.6389      | 12.7 to 22.5   | Peptide+GlcNAc not detected |
| 3-5-1-1   | NK11     | 2663.0325  | 3      | 888.6845        | 888.6883      | 9.6 to 11.4    | Peptide+GlcNAc not detected |
| 3-6-0-0   | NK11     | 2387.932   | 3      | 796.9843        | 797.0018      | 11.3 to 16.5   | Peptide+GlcNAc not detected |
| 5-6-1-1   | NK11     | 3231.2441  | 3      | 1078.0884       | 1078.0844     | 9.2 to 11.8    | Peptide+GlcNAc not detected |
| 5-6-1-2   | NK11     | 3522.3395  | 3      | 1175.1202       | 1175.1279     | 9.5 to 10.8    | Peptide+GlcNAc not detected |

**CD16a N162 (F158) Peptide 4: GSKNVSSE**

| Glycoform | Data set | Exact mass | Charge | Calculated mass | Observed mass | Retention time | Comment   |
|-----------|----------|------------|--------|-----------------|---------------|----------------|-----------|
| 4-5-1-1   | NK13     | 3013.1803  | 3      | 1005.4004       | 1005.3994     | 11.8 to 19.0   | Annotated |

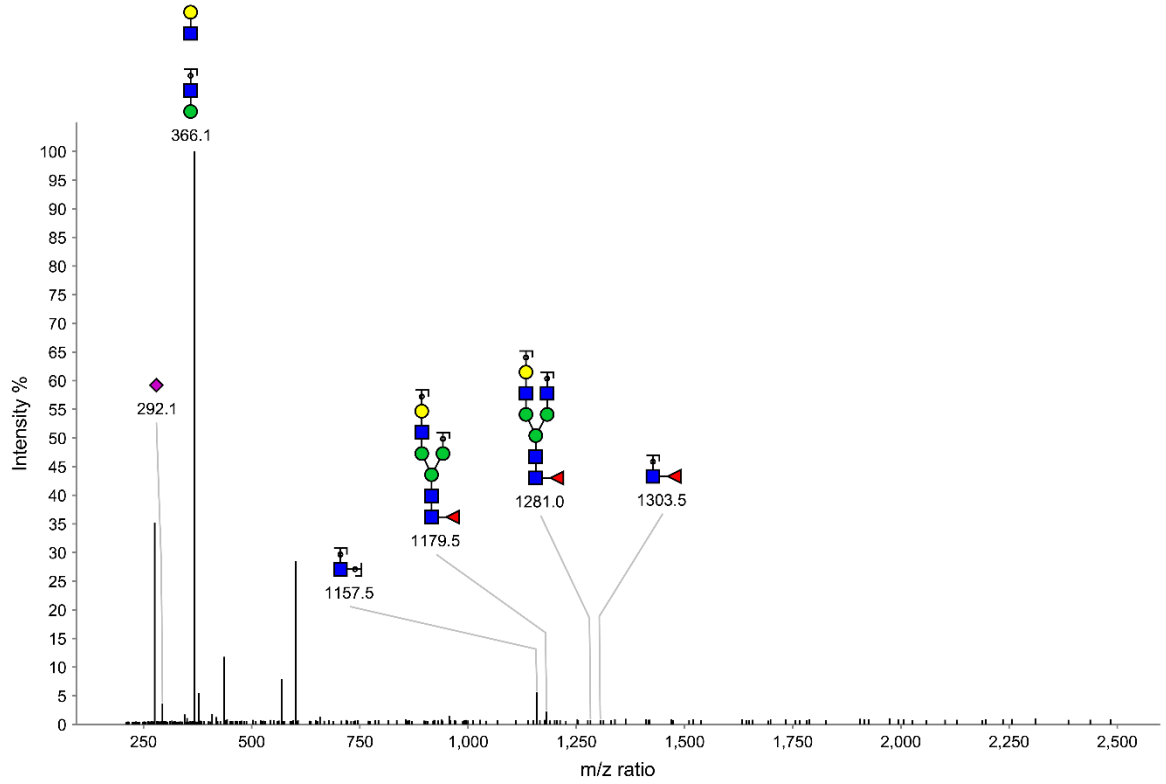

**CD16a N162 (F158) Peptide 5: FGSKNVSSE**

| Glycoform | Data set | Exact mass | Charge | Calculated mass | Observed mass | Retention time | Comment                     |
|-----------|----------|------------|--------|-----------------|---------------|----------------|-----------------------------|
| 3-5-1-1   | NK13     | 2810.1009  | 3      | 937.7073        | 937.7076      | 15.9 to 17.5   | No MS2                      |
| 5-5-1-1   | NK13     | 3216.2597  | 3      | 1073.0936       | 1073.1087     | 18.4 to 20.0   | Peptide+GlcNAc not detected |

**CD16a N162 (F158) Peptide 5: FGSKNVSSE**

| Glycoform | Data set | Exact mass | Charge | Calculated mass | Observed mass | Retention time | Comment       |
|-----------|----------|------------|--------|-----------------|---------------|----------------|---------------|
| 4-5-1-1   | NK12     | 3499.4176  | 3      | 1167.4795       | 1167.4791     | 25.5 to 27.3   | Not annotated |
| 4-5-1-1   | NK13     | 3499.4176  | 3      | 1167.4795       | 1167.4769     | 25.8 to 27.2   | Annotated     |

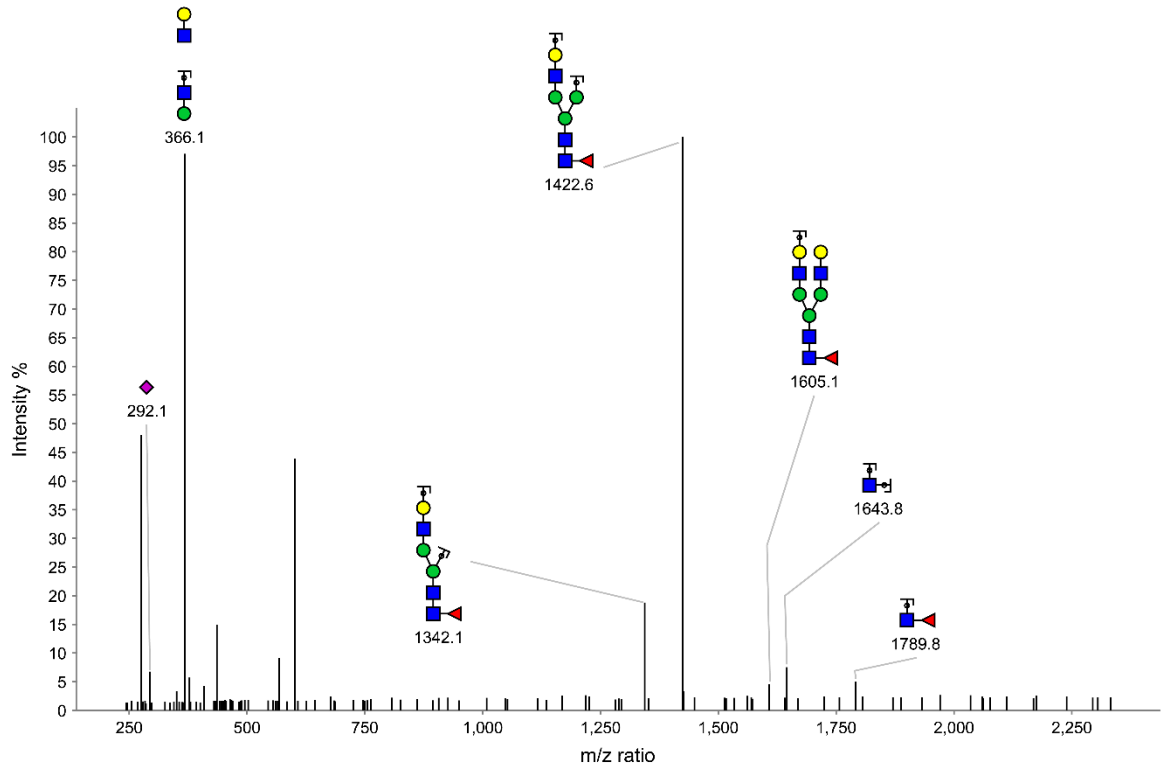

**CD16a N162 (F158) Peptide 6: CRGLFGSKNVSSE+IAM**

| Glycoform | Data set | Exact mass | Charge | Calculated mass | Observed mass | Retention time | Comment       |
|-----------|----------|------------|--------|-----------------|---------------|----------------|---------------|
| 3-5-1-1   | NK13     | 3296.3382  | 3      | 1099.7864       | 1099.7877     | 26.1 to 27.5   | No MS2        |
| 4-5-1-1   | NK12     | 3499.4176  | 3      | 1167.4795       | 1167.4791     | 25.5 to 27.3   | Not annotated |

**CD16a N162 (F158) Peptide 6: CRGLFGSKNVSSE+IAM**

| Glycoform | Data set | Exact mass | Charge | Calculated mass | Observed mass | Retention time | Comment                     |
|-----------|----------|------------|--------|-----------------|---------------|----------------|-----------------------------|
| 4-5-1-1   | NK11     | 3118.3321  | 3      | 1040.4510       | 1040.4528     | 48.4 to 52.7   | Not annotated               |
| 4-5-1-1   | NK11     | 3118.3321  | 2      | 1560.1731       | 1560.1758     | 48.4 to 52.7   | Peptide+GlcNAc not detected |

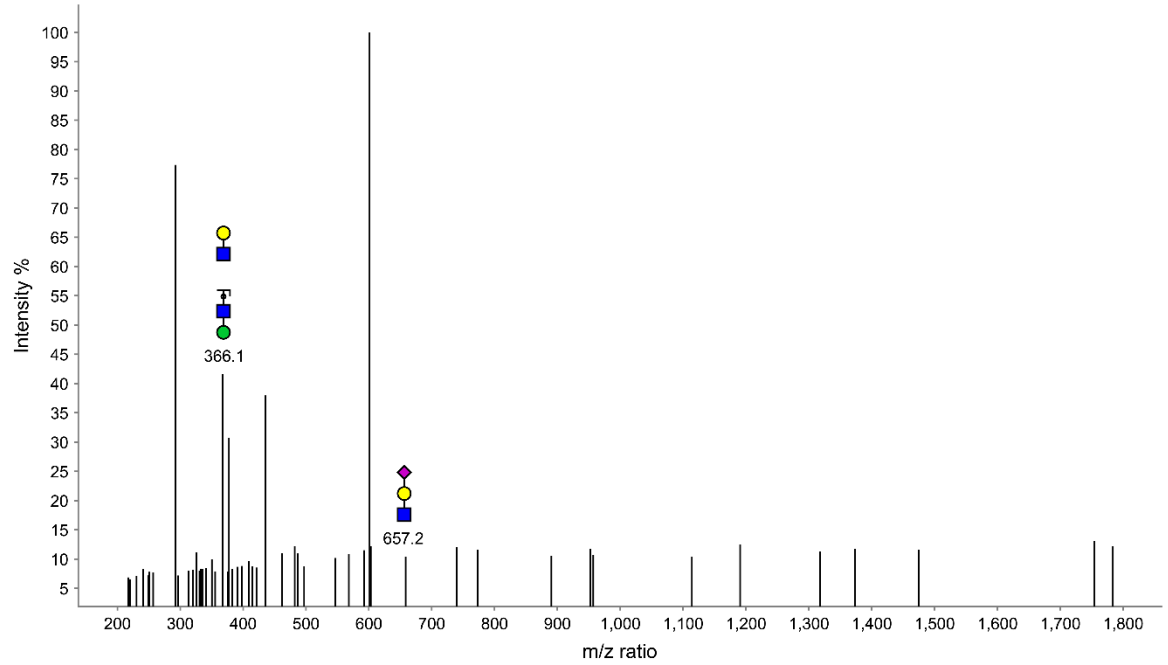

**CD16a N169 Peptide 1: TVNITITQGL**



| Glycoform | Data set | Exact mass | Charge | Calculated mass | Observed mass | Retention time | Comment                     |
|-----------|----------|------------|--------|-----------------|---------------|----------------|-----------------------------|
| 4-5-1-2   | NK11     | 3409.4275  | 3      | 1137.4828       | 1137.4852     | 42.3 to 43.8   | Peptide+GlcNAc not detected |

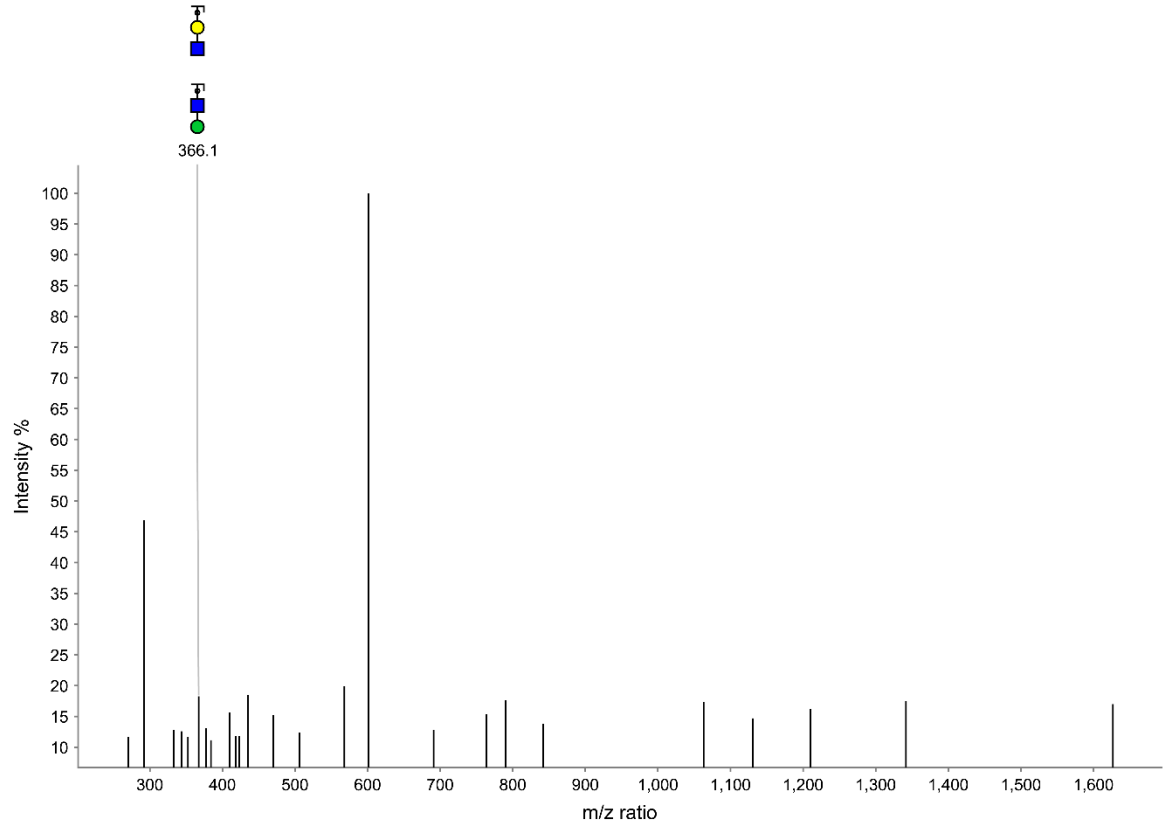

**CD16a N169 Peptide 1: TVNITITQGL**

| Glycoform | Data set | Exact mass | Charge | Calculated mass | Observed mass | Retention time | Comment                     |
|-----------|----------|------------|--------|-----------------|---------------|----------------|-----------------------------|
| 5-6-1-1   | NK11     | 3483.4643  | 3      | 1162.1618       | 1162.1636     | 47.9 to 50.3   | Peptide+GlcNAc not detected |

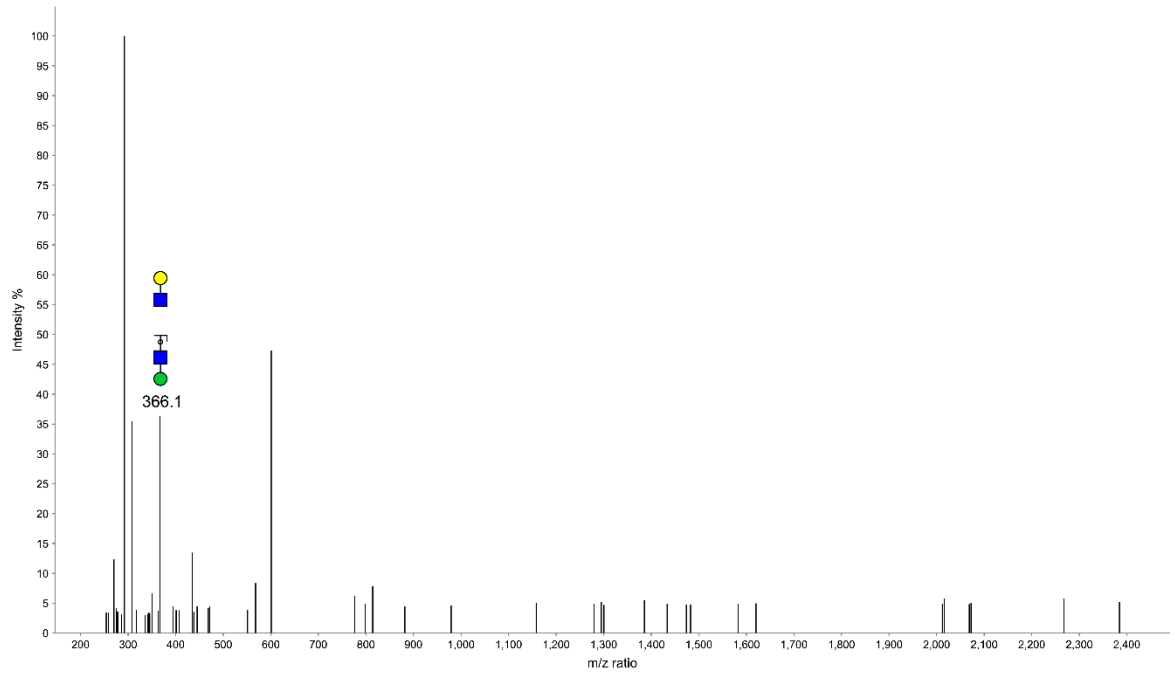

**CD16a N169 Peptide 1: TVNITITQGL**

| Glycoform | Data set | Exact mass | Charge | Calculated mass | Observed mass | Retention time | Comment   |
|-----------|----------|------------|--------|-----------------|---------------|----------------|-----------|
| 3-5-1-1   | NK13     | 2986.2898  | 3      | 996.4369        | 996.4375      | 50.4 to 51.1   | Annotated |

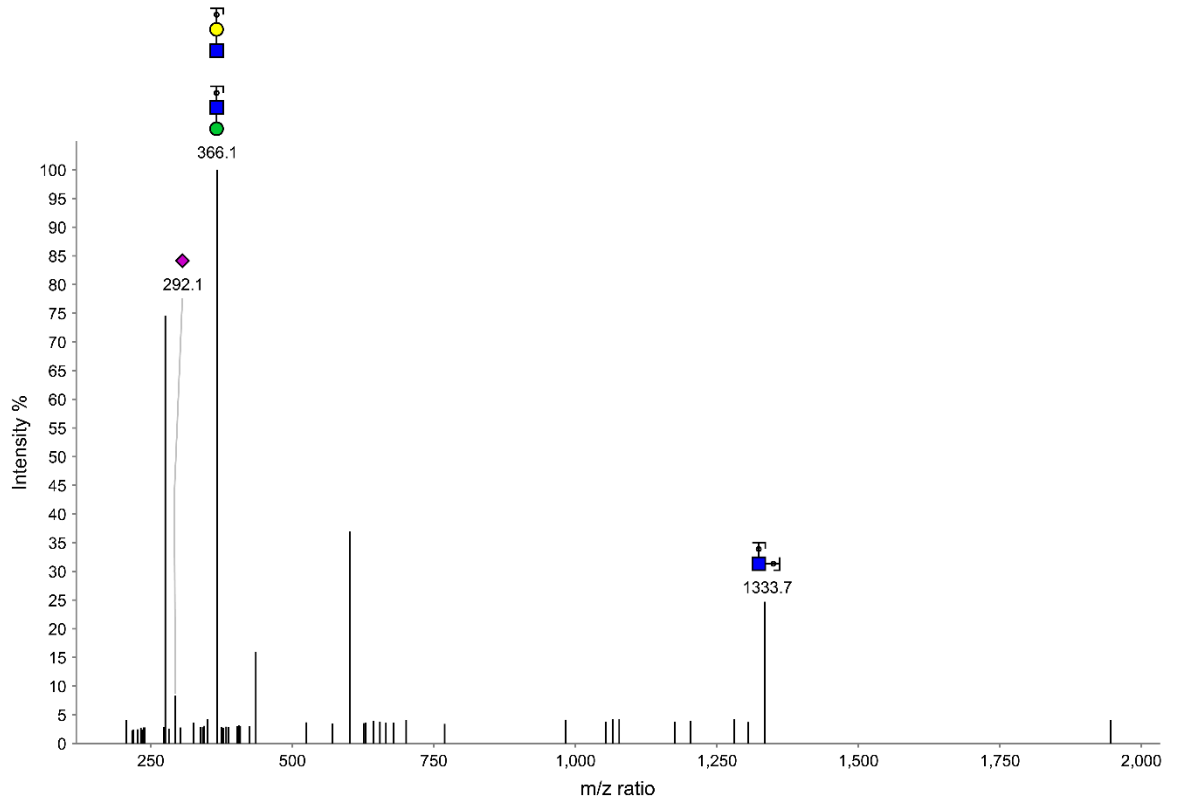

**CD16a N169 Peptide 2: TVNITITQGLA**

| Glycoform | Data set | Exact mass | Charge | Calculated mass | Observed mass | Retention time | Comment              |
|-----------|----------|------------|--------|-----------------|---------------|----------------|----------------------|
| 4-5-1-1   | NK13     | 3189.3692  | 3      | 1064.1301       | 1064.1300     | 49.7 to 51.1   | Annotated (Figure 2) |

**CD16a N169 Peptide 2: TVNITITQGLA**

| Glycoform | Data set | Exact mass | Charge | Calculated mass | Observed mass | Retention time | Comment   |
|-----------|----------|------------|--------|-----------------|---------------|----------------|-----------|
| 4-5-1-2   | NK13     | 3480.4646  | 3      | 1161.1619       | 1161.1626     | 53.8 to 55.6   | Annotated |

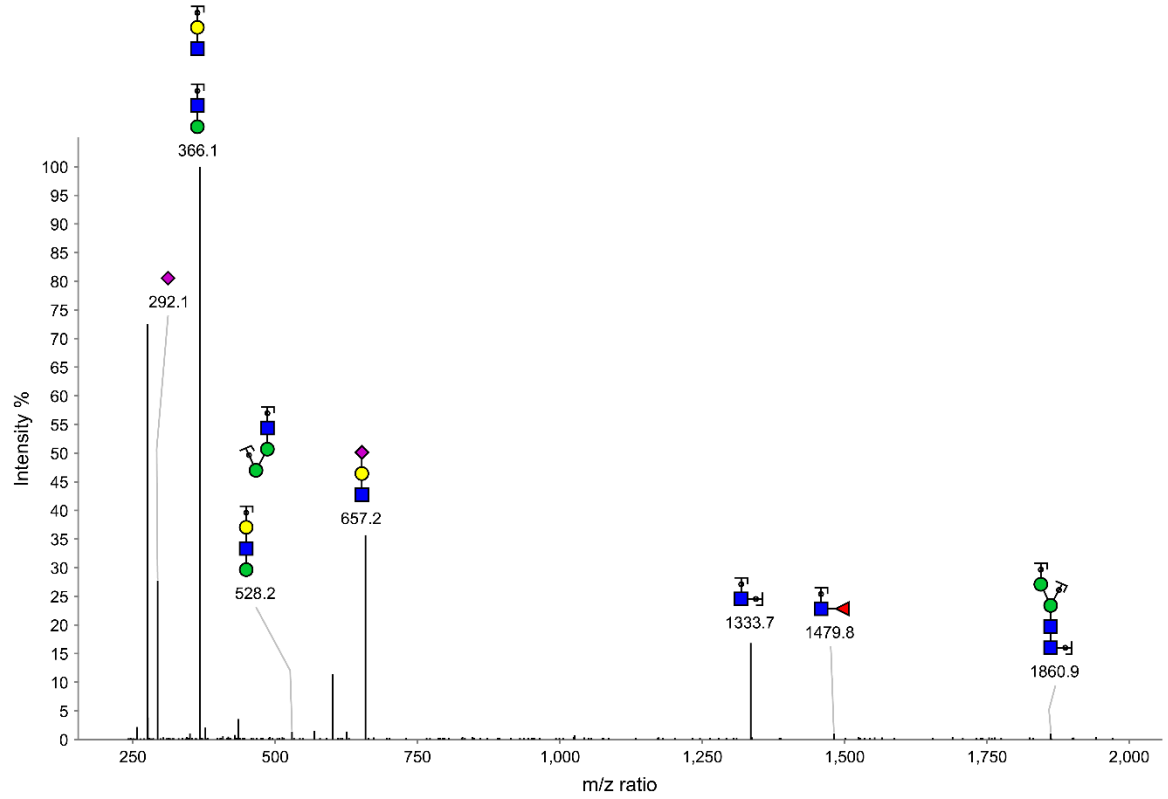

**CD16a N169 Peptide 2: TVNITITQGLA**

| Glycoform | Data set | Exact mass | Charge | Calculated mass | Observed mass | Retention time | Comment   |
|-----------|----------|------------|--------|-----------------|---------------|----------------|-----------|
| 5-6-1-1   | NK13     | 3554.5014  | 3      | 1185.8408       | 1185.8413     | 48.3 to 50.4   | Annotated |

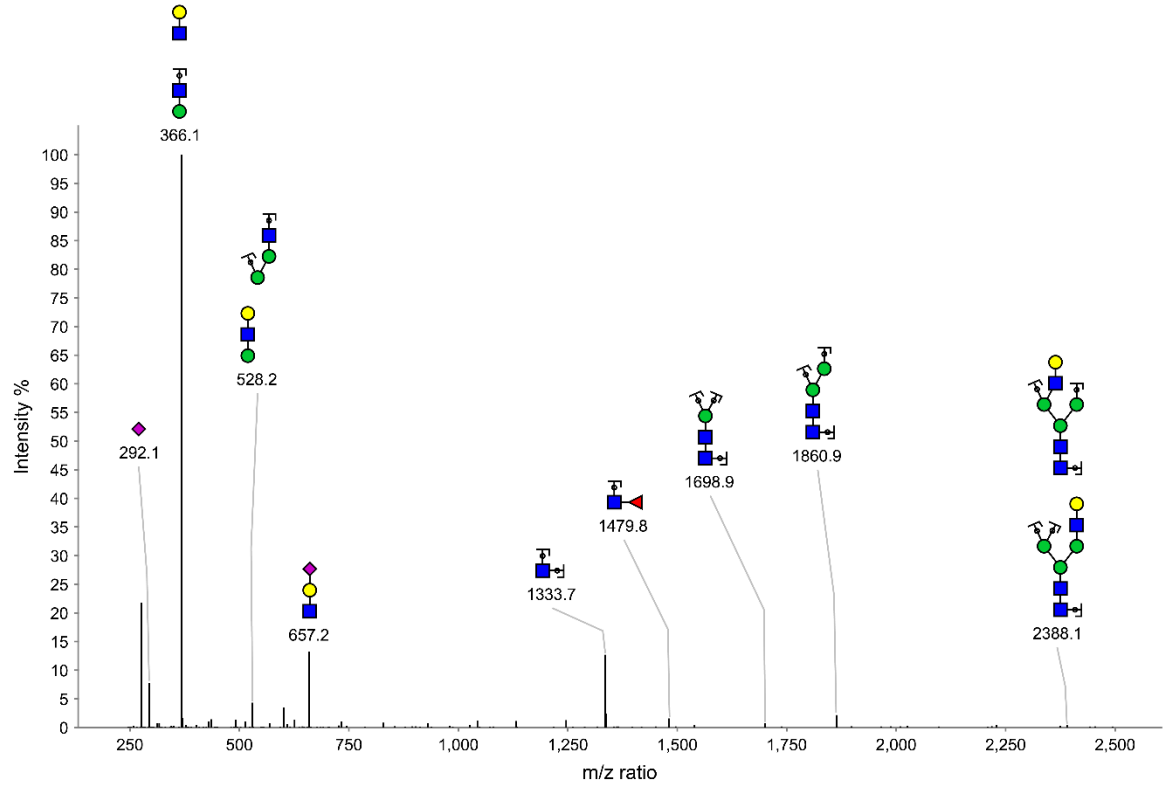

**CD16a N169 Peptide 2: TVNITITQGLA**

| Glycoform | Data set | Exact mass | Charge | Calculated mass | Observed mass | Retention time | Comment   |
|-----------|----------|------------|--------|-----------------|---------------|----------------|-----------|
| 5-6-1-2   | NK13     | 3845.5968  | 3      | 1282.8726       | 1282.8740     | 53.4 to 54.4   | Annotated |

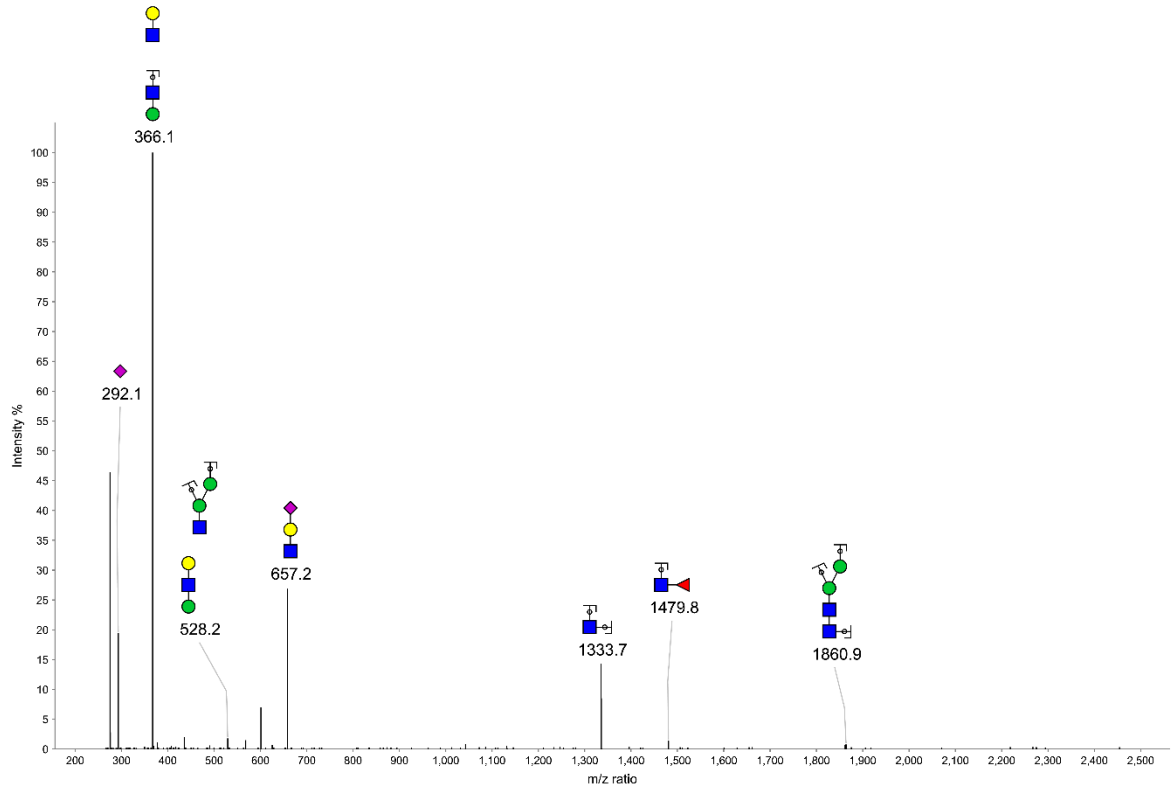

**CD16a N169 Peptide 2: TVNITITQGLA**

| Glycoform | Data set | Exact mass | Charge | Calculated mass | Observed mass | Retention time | Comment   |
|-----------|----------|------------|--------|-----------------|---------------|----------------|-----------|
| 5-6-1-3   | NK13     | 4136.6922  | 3      | 1379.9044       | 1379.9075     | 57.1 to 58.9   | Annotated |

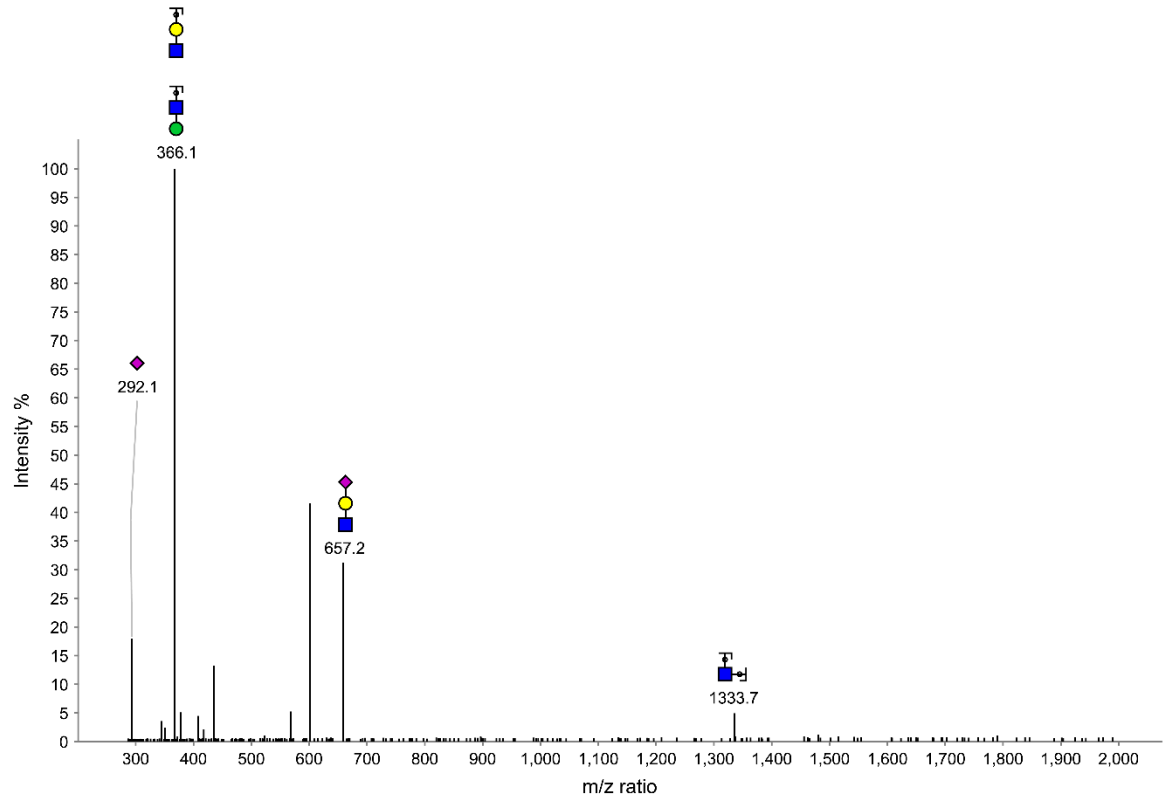

**CD16a N169 Peptide 2: TVNITITQGLA**



| Glycoform | Data set | Exact mass | Charge | Calculated mass | Observed mass | Retention time | Comment   |
|-----------|----------|------------|--------|-----------------|---------------|----------------|-----------|
| 6-7-1-2   | NK13     | 4210.729   | 3      | 1404.5833       | 1404.5837     | 52.8 to 53.6   | Annotated |

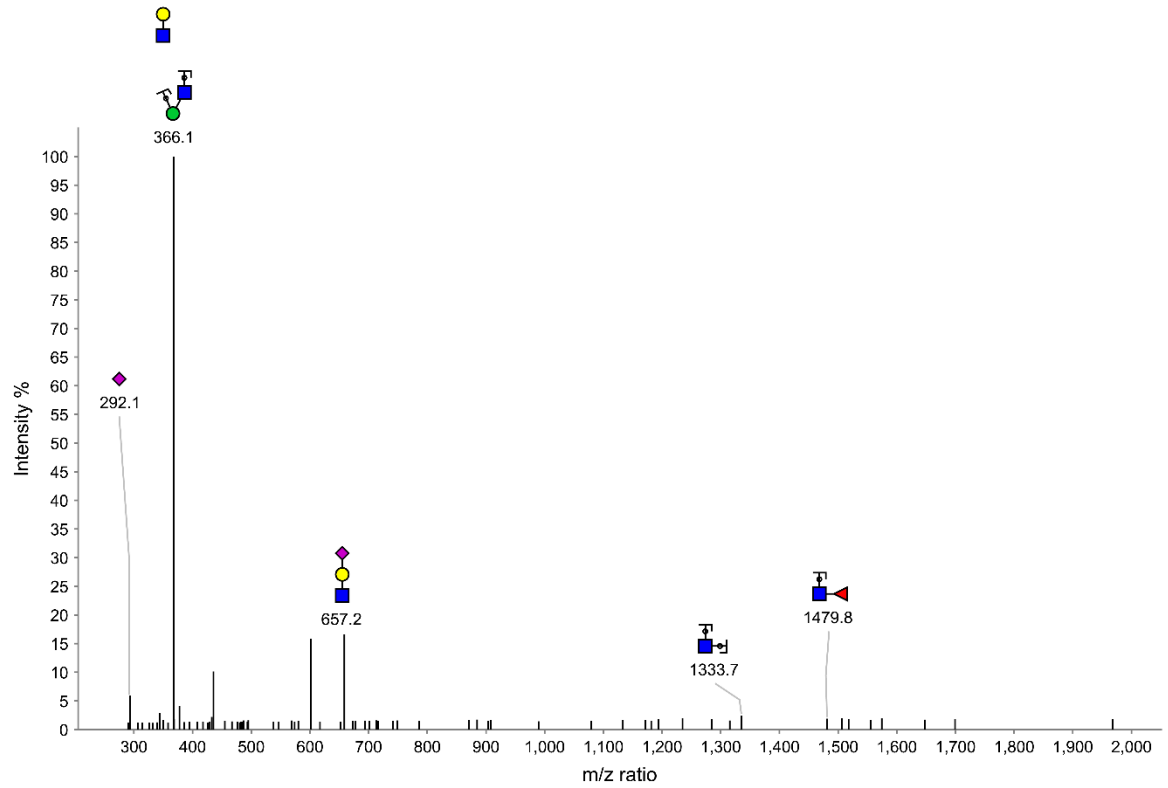

**CD16a N169 Peptide 2: TVNITITQGLA**

| Glycoform | Data set | Exact mass | Charge | Calculated mass | Observed mass | Retention time | Comment                     |
|-----------|----------|------------|--------|-----------------|---------------|----------------|-----------------------------|
| 4-5-0-2   | NK13     | 3334.4067  | 3      | 1112.4759       | 1112.4933     | 49.2 to 50.4   | Peptide+GlcNAc not detected |
| 5-6-2-1   | NK13     | 3700.5593  | 3      | 1234.5268       | 1234.5259     | 49.1 to 49.7   | Peptide+GlcNAc not detected |
| 5-6-2-2   | NK13     | 3991.6547  | 4      | 998.9207        | 998.9196      | 53.2 to 54.2   | No MS2                      |
| 6-7-1-1   | NK13     | 3919.6336  | 3      | 1307.5515       | 1307.5513     | 48.2 to 49.5   | No MS2                      |
| 6-7-1-3   | NK13     | 4501.8244  | 4      | 1126.4631       | 1126.4681     | 56.5 to 57.9   | Peptide+GlcNAc not detected |
| 7-8-1-2   | NK13     | 4575.8612  | 4      | 1144.9723       | 1144.9728     | 51.8 to 52.9   | Peptide+GlcNAc not detected |
| 7-8-1-3   | NK13     | 4866.9566  | 4      | 1217.7462       | 1217.7503     | 54.8 to 57.1   | Peptide+GlcNAc not detected |
| 8-9-1-3   | NK13     | 5232.0888  | 4      | 1309.0292       | 1309.0326     | 51.1 to 51.7   | Peptide+GlcNAc not detected |
| 8-9-1-4   | NK13     | 5523.1842  | 4      | 1381.8031       | 1381.8045     | 55.3 to 57.0   | Peptide+GlcNAc not detected |

**CD16a N169 Peptide 2: TVNITITQGLA**

| Glycoform | Data set | Exact mass | Charge | Calculated mass | Observed mass | Retention time | Comment   |
|-----------|----------|------------|--------|-----------------|---------------|----------------|-----------|
| 2-3-1-0   | NK09     | 1983.8882  | 2      | 992.9511        | 992.9533      | 35.0 to 35.5   | Annotated |

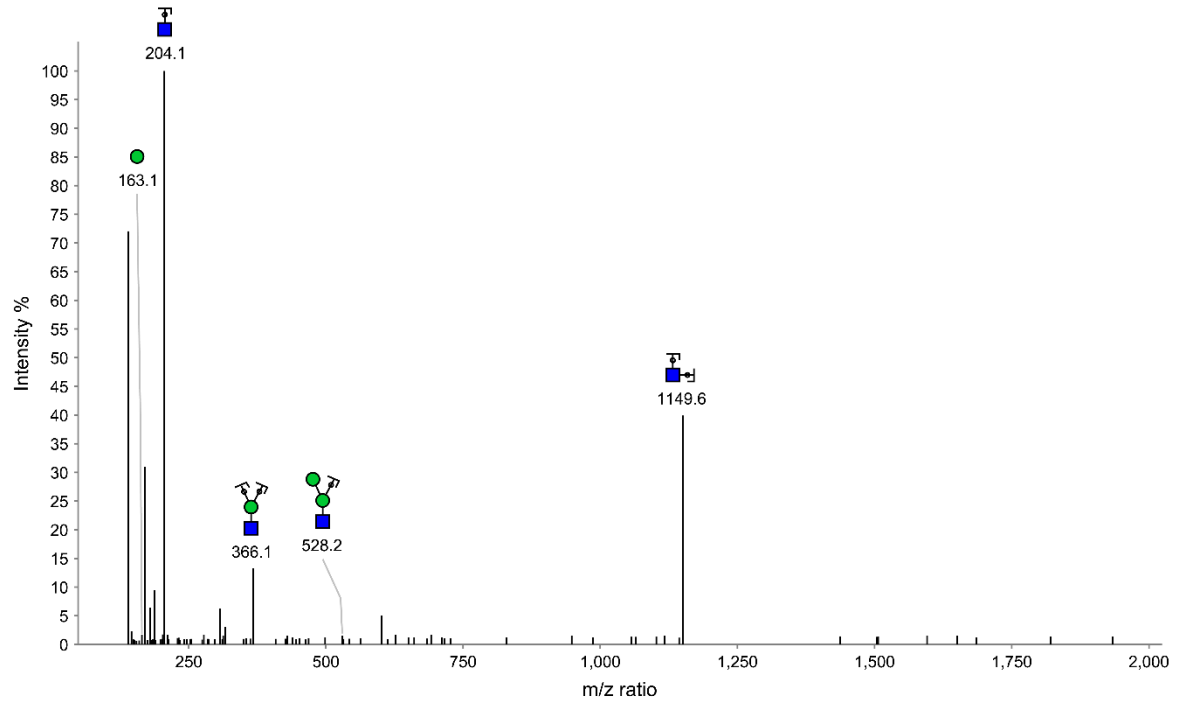

**CD16a N169 Peptide 3: TVNITITQG**

| Glycoform | Data set | Exact mass | Charge | Calculated mass | Observed mass | Retention time | Comment               |
|-----------|----------|------------|--------|-----------------|---------------|----------------|-----------------------|
| 3-4-1-1   | NK09     | 2640.1158  | 3      | 881.0456        | 881.0479      | 35.6 to 36.8   | Annotated (Figure S4) |

**CD16a N169 Peptide 3: TVNITITQG**

| Glycoform | Data set | Exact mass | Charge | Calculated mass | Observed mass | Retention time | Comment   |
|-----------|----------|------------|--------|-----------------|---------------|----------------|-----------|
| 4-5-1-1   | NK09     | 3005.248   | 2      | 1503.6310       | 1503.6322     | 35.3 to 35.8   | Annotated |

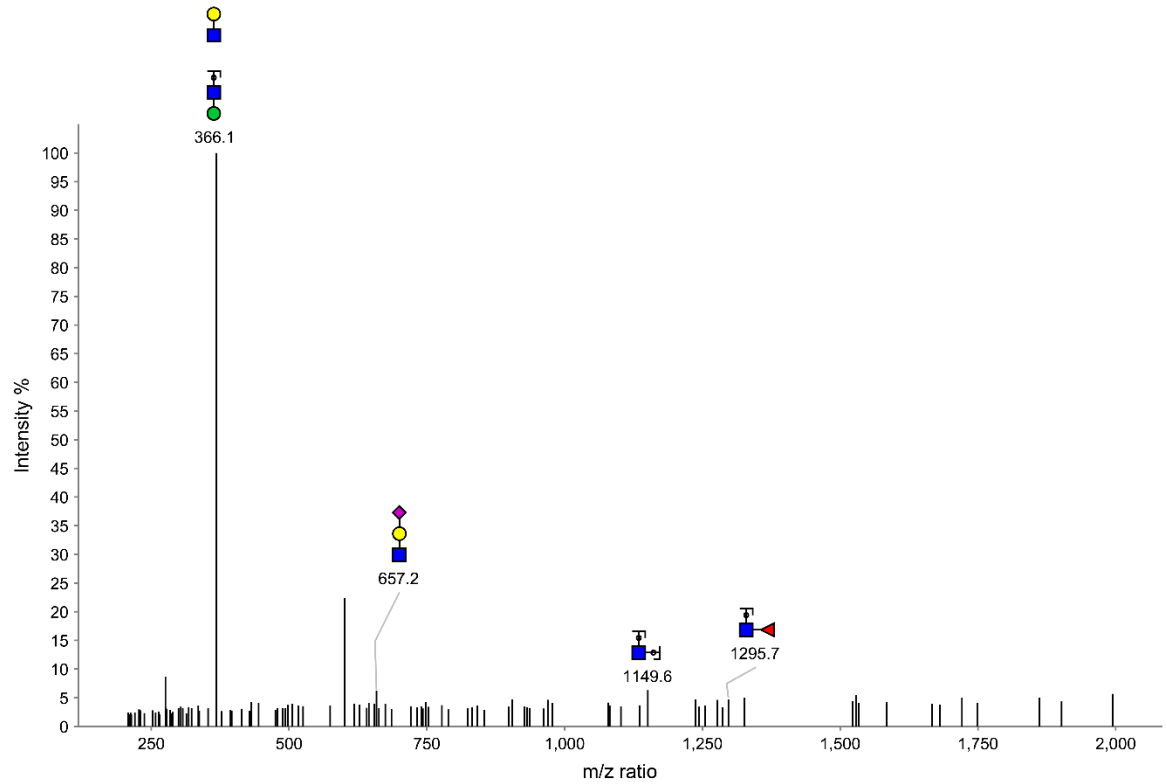

**CD16a N169 Peptide 3: TVNITITQG**

| Glycoform | Data set | Exact mass | Charge | Calculated mass | Observed mass | Retention time | Comment                     |
|-----------|----------|------------|--------|-----------------|---------------|----------------|-----------------------------|
| 3-3-1-0   | NK09     | 2186.9676  | 2      | 1094.4908       | 1094.4910     | 35.9 to 36.3   | No MS2                      |
| 4-4-1-1   | NK09     | 2843.1952  | 2      | 1422.6046       | 1422.6063     | 35.8 to 36.2   | Peptide+GlcNAc not detected |

**CD16a N169 Peptide 3: TVNITITQG**

| Glycoform | Data set | Exact mass | Charge | Calculated mass | Observed mass | Retention time | Comment   |
|-----------|----------|------------|--------|-----------------|---------------|----------------|-----------|
| 2-8-0-0   | NK06     | 2891.0859  | 3      | 964.7023        | 964.7015      | 15.6 to 16.7   | Annotated |

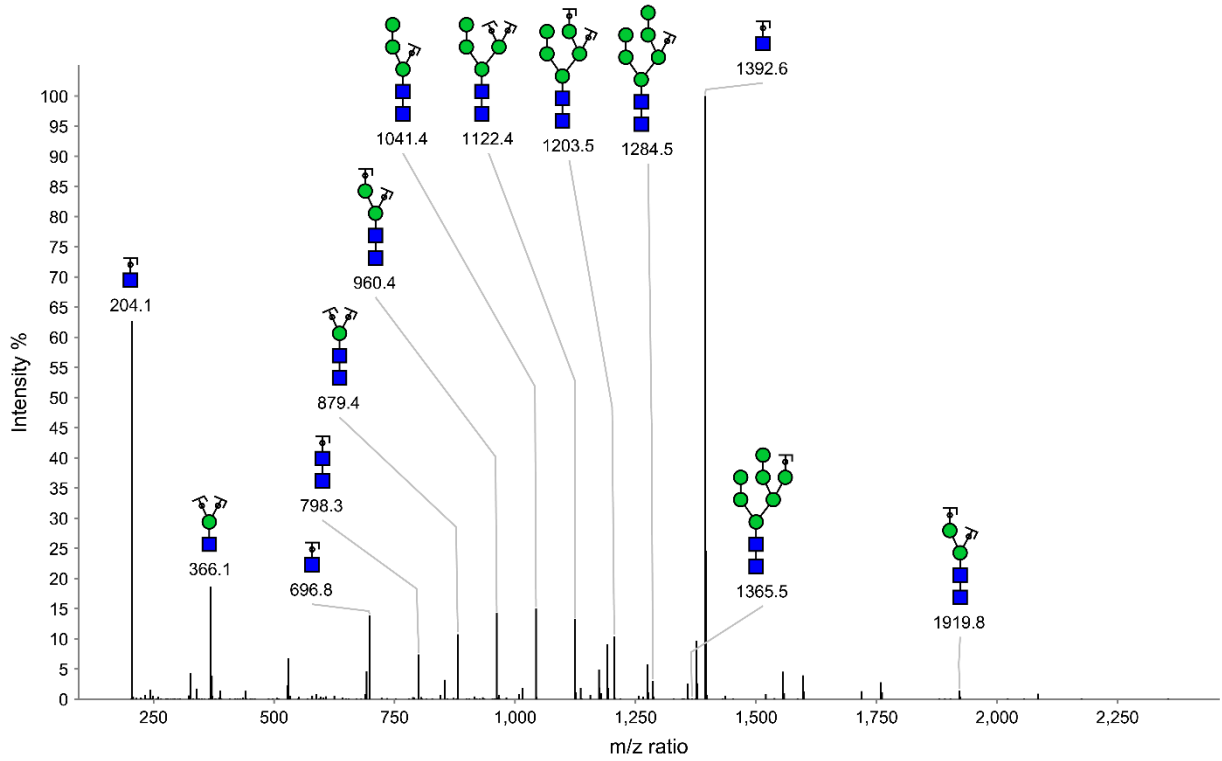

**IgG1 N297 Peptide 1: EEQYNSTYR**

| Glycoform | Data set | Exact mass | Charge | Calculated mass | Observed mass | Retention time | Comment   |
|-----------|----------|------------|--------|-----------------|---------------|----------------|-----------|
| 2-9-0-0   | NK06     | 3053.1387  | 3      | 1018.7199       | 1018.7191     | 15.8 to 16.7   | Annotated |

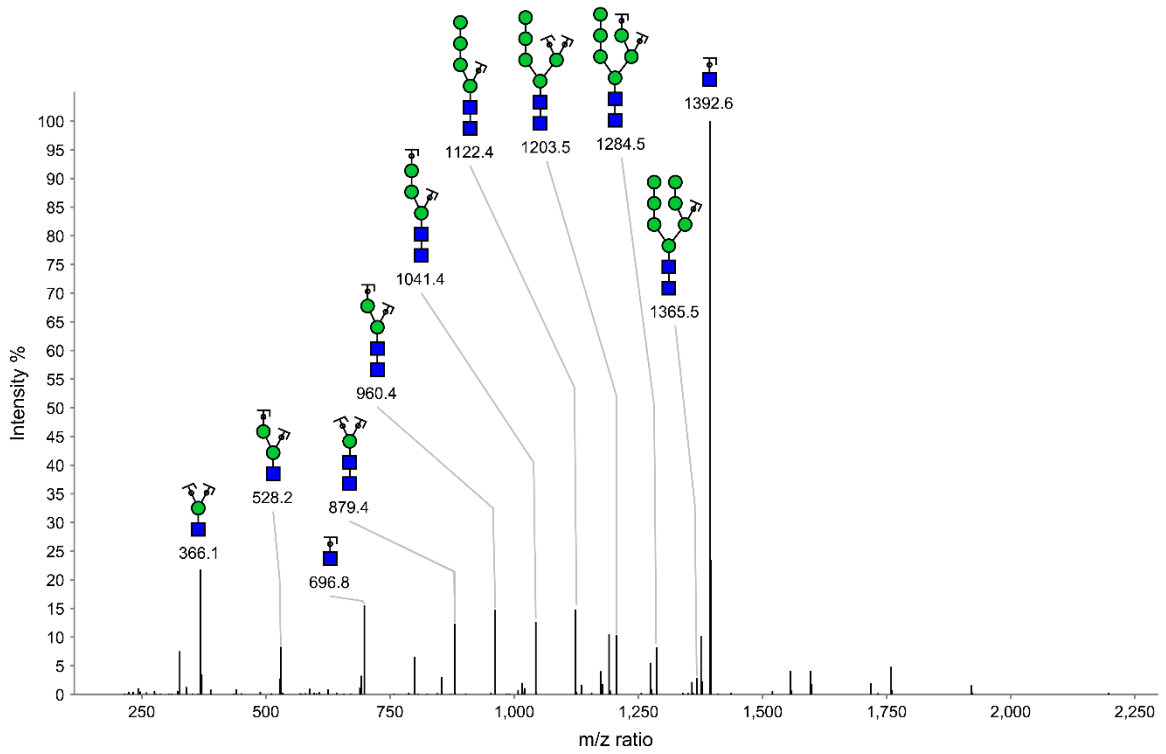

**IgG1 N297 Peptide 1: EEQYNSTYR**



| Glycoform | Data set | Exact mass | Charge | Calculated mass | Observed mass | Retention time | Comment   |
|-----------|----------|------------|--------|-----------------|---------------|----------------|-----------|
| 3-3-0-0   | NK06     | 2283.9013  | 2      | 1142.9577       | 1142.9564     | 16.6 to 18.1   | Annotated |

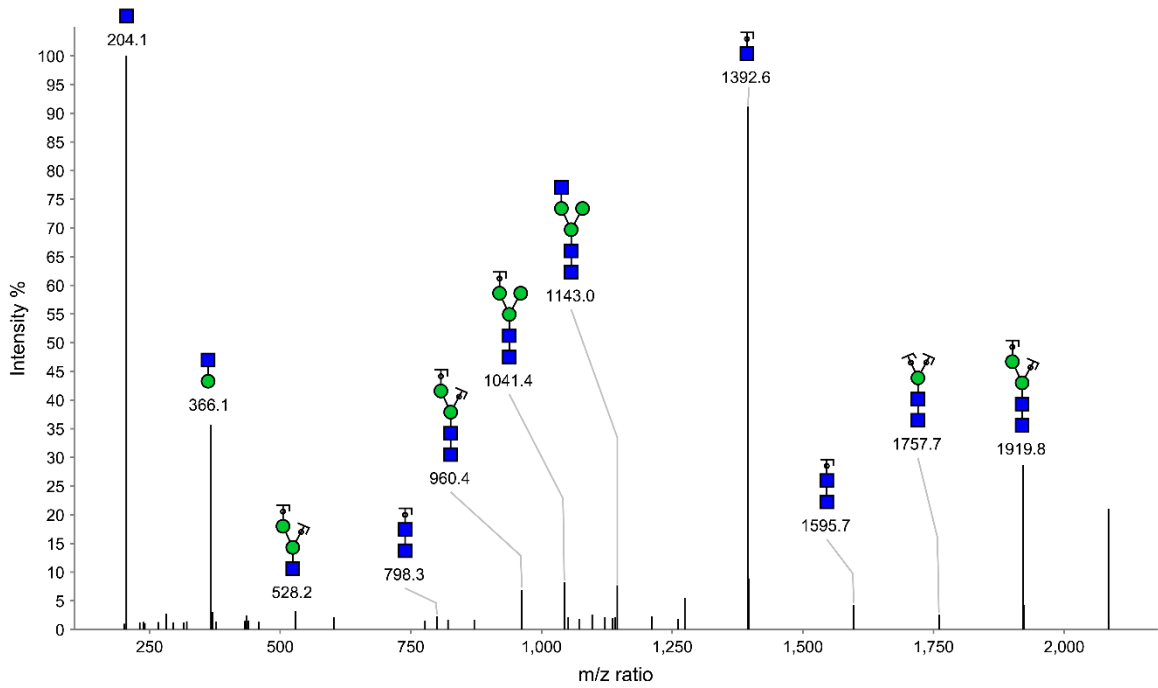

**IgG1 N297 Peptide 1: EEQYNSTYR**

| Glycoform | Data set | Exact mass | Charge | Calculated mass | Observed mass | Retention time | Comment   |
|-----------|----------|------------|--------|-----------------|---------------|----------------|-----------|
| 3-3-1-0   | NK06     | 2429.9592  | 2      | 1215.9866       | 1215.9835     | 16.6 to 17.6   | Annotated |

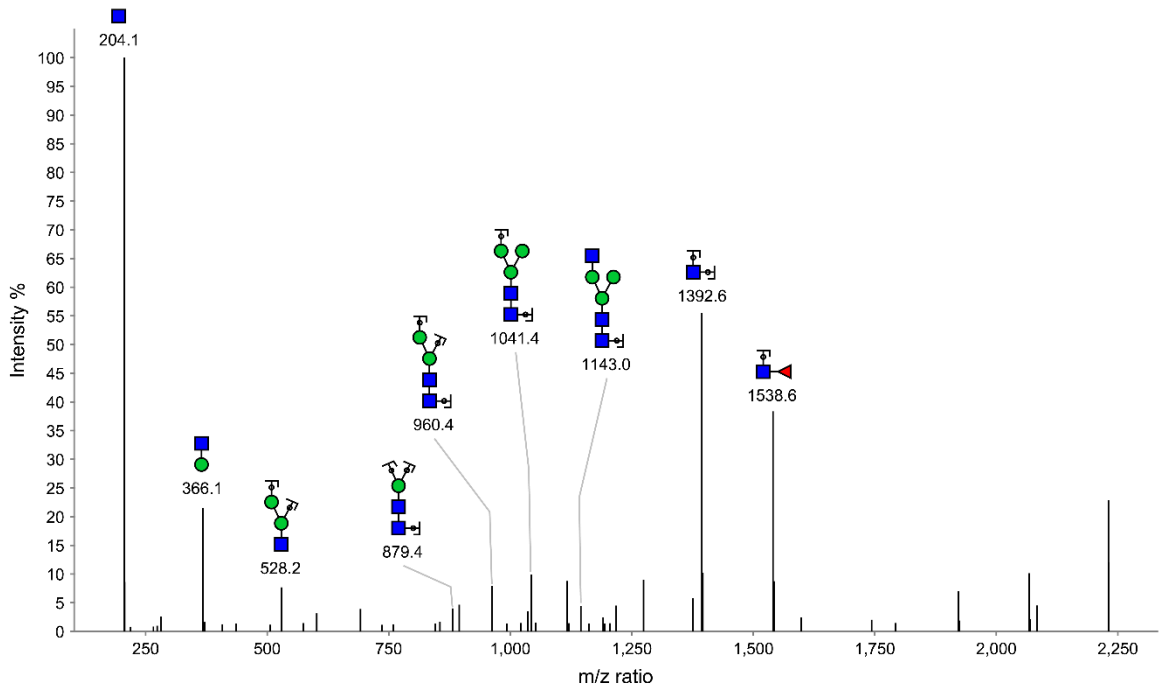

**IgG1 N297 Peptide 1: EEQYNSTYR**

| Glycoform | Data set | Exact mass | Charge | Calculated mass | Observed mass | Retention time | Comment   |
|-----------|----------|------------|--------|-----------------|---------------|----------------|-----------|
| 3-4-0-0   | NK06     | 2445.9541  | 2      | 1223.9841       | 1223.9852     | 16.4 to 17.5   | Annotated |

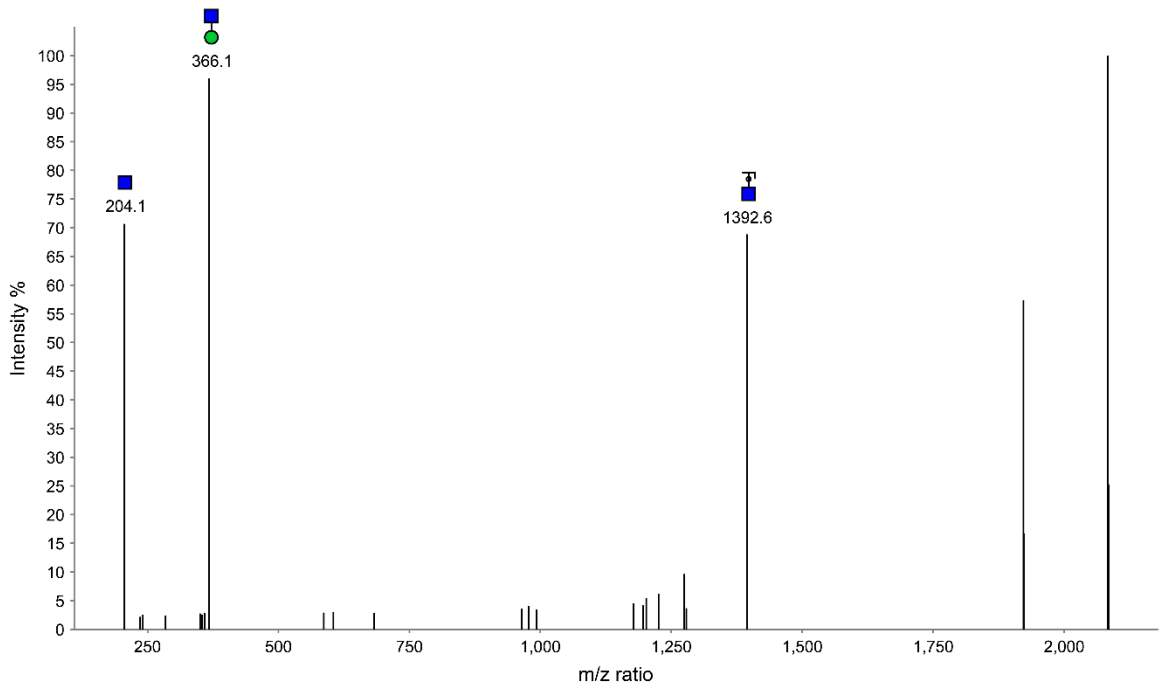

**IgG1 N297 Peptide 1: EEQYNSTYR**

| Glycoform | Data set | Exact mass | Charge | Calculated mass | Observed mass | Retention time | Comment   |
|-----------|----------|------------|--------|-----------------|---------------|----------------|-----------|
| 3-4-1-0   | NK06     | 2592.012   | 3      | 865.0110        | 865.0132      | 17.2 to 17.3   | Annotated |

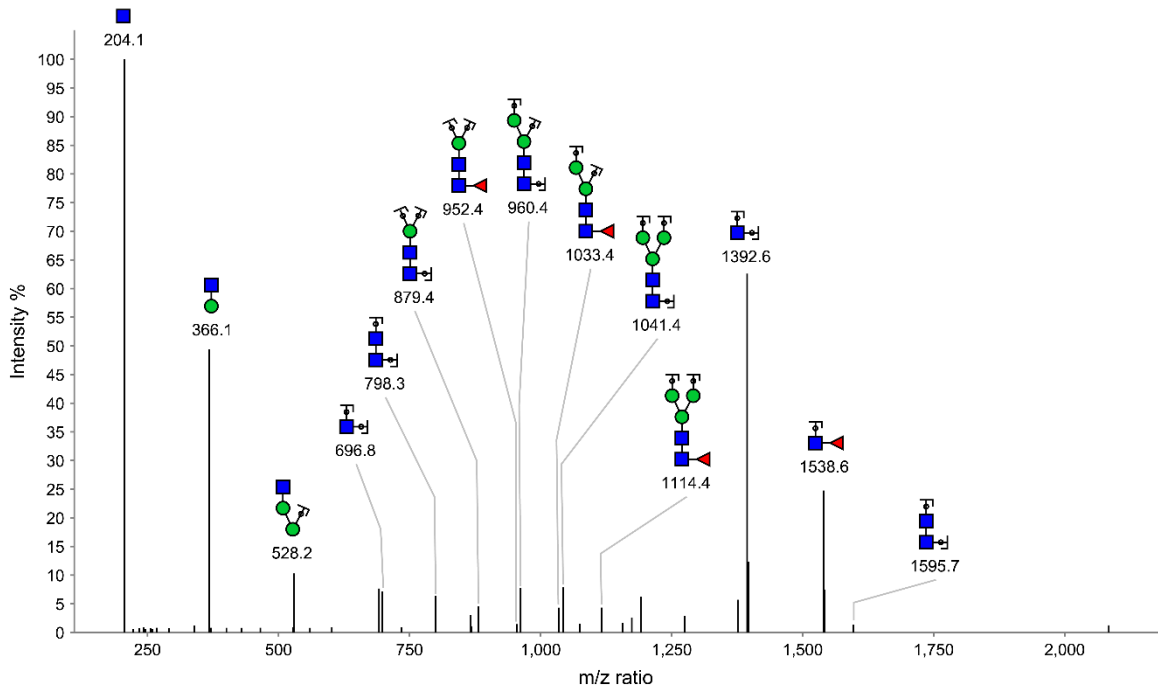

**IgG1 N297 Peptide 1: EEQYNSTYR**

| Glycoform | Data set | Exact mass | Charge | Calculated mass | Observed mass | Retention time | Comment   |
|-----------|----------|------------|--------|-----------------|---------------|----------------|-----------|
| 4-3-0-0   | NK06     | 2486.9807  | 3      | 830.0006        | 830.0007      | 16.7 to 17.7   | Annotated |

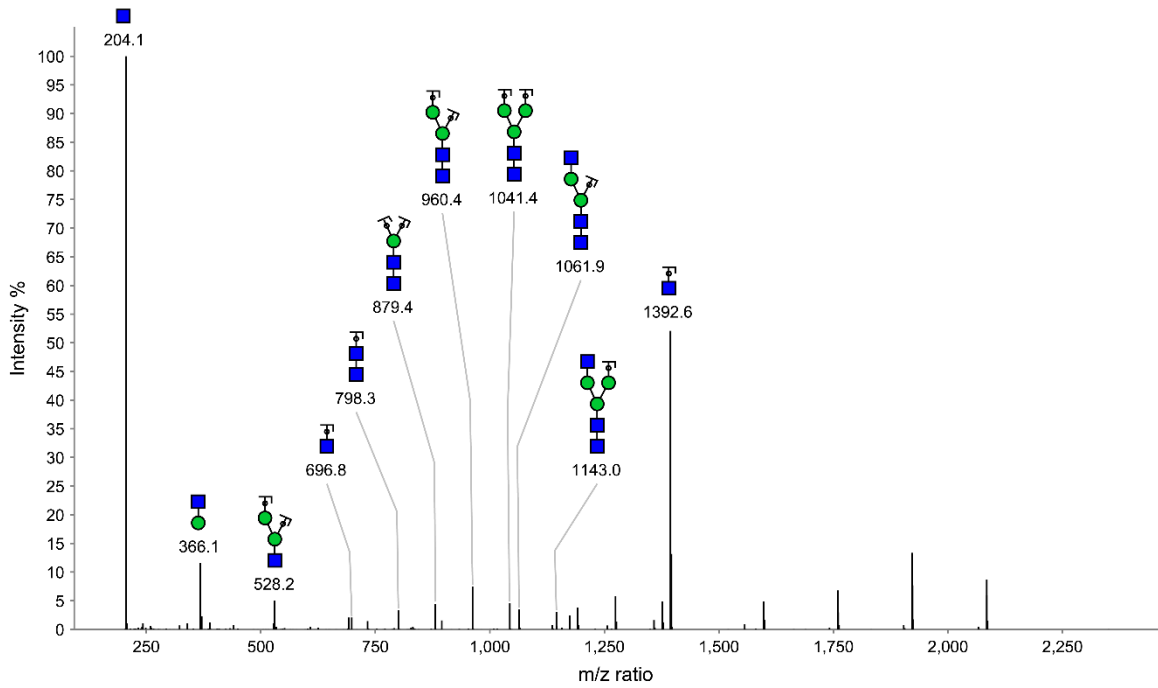

**IgG1 N297 Peptide 1: EEQYNSTYR**

| Glycoform | Data set | Exact mass | Charge | Calculated mass | Observed mass | Retention time | Comment   |
|-----------|----------|------------|--------|-----------------|---------------|----------------|-----------|
| 4-3-1-0   | NK06     | 2633.0386  | 3      | 878.6865        | 878.6852      | 16.7 to 17.4   | Annotated |

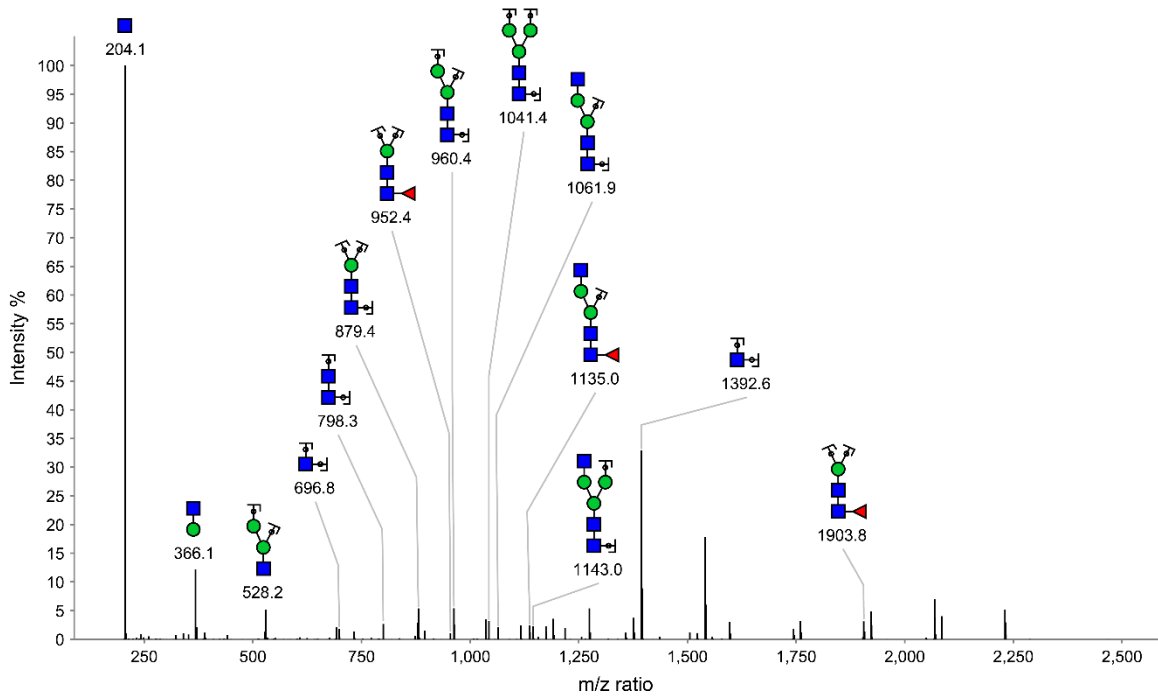

**IgG1 N297 Peptide 1: EEQYNSTYR**

| Glycoform | Data set | Exact mass | Charge | Calculated mass | Observed mass | Retention time | Comment   |
|-----------|----------|------------|--------|-----------------|---------------|----------------|-----------|
| 4-4-0-0   | NK06     | 2649.0335  | 3      | 884.0182        | 884.0164      | 16.3 to 17.3   | Annotated |

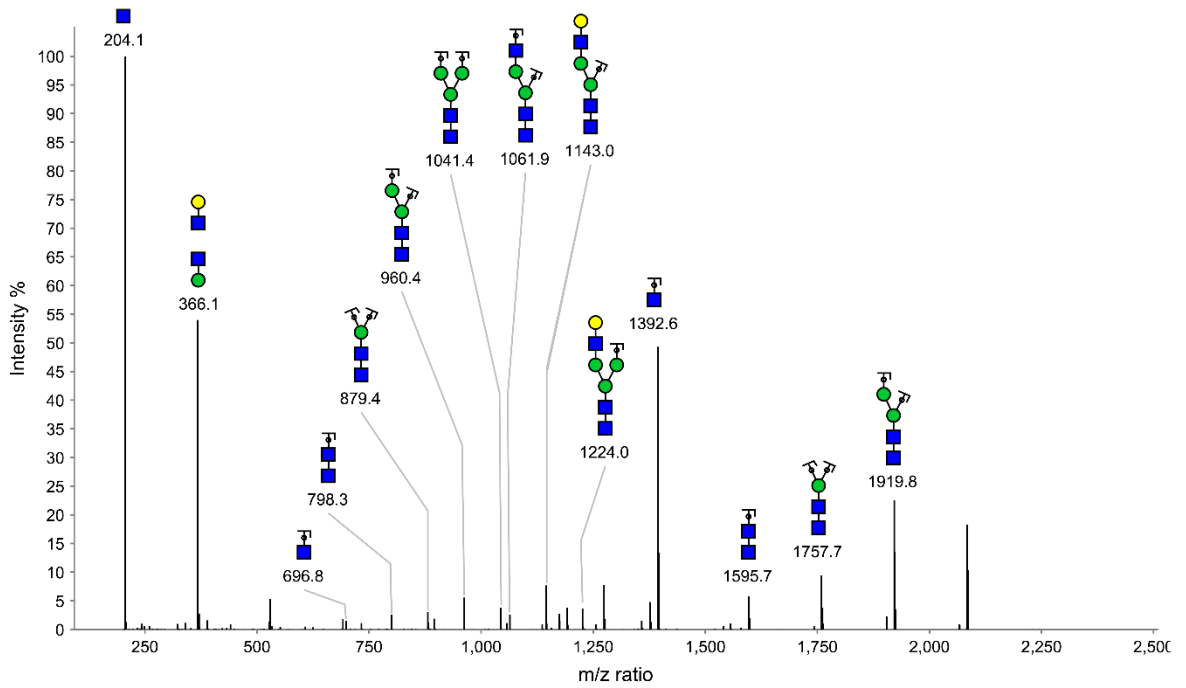

**IgG1 N297 Peptide 1: EEQYNSTYR**

| Glycoform | Data set | Exact mass | Charge | Calculated mass | Observed mass | Retention time | Comment   |
|-----------|----------|------------|--------|-----------------|---------------|----------------|-----------|
| 4-4-0-1   | NK06     | 2940.1289  | 3      | 981.0500        | 981.0504      | 19.5 to 20.7   | Annotated |

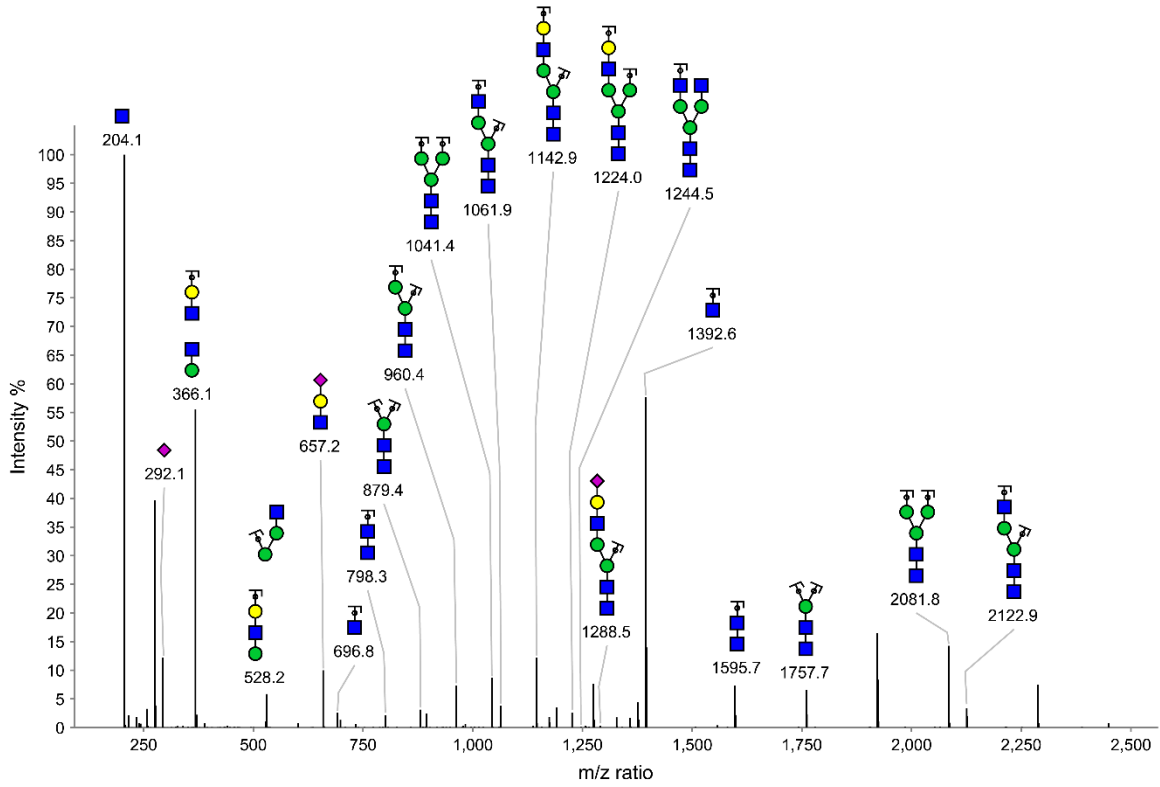

**IgG1 N297 Peptide 1: EEQYNSTYR**



| Glycoform | Data set | Exact mass | Charge | Calculated mass | Observed mass | Retention time | Comment   |
|-----------|----------|------------|--------|-----------------|---------------|----------------|-----------|
| 4-4-1-0   | NK06     | 2795.0914  | 3      | 932.7041        | 932.7022      | 16.5 to 17.5   | Annotated |

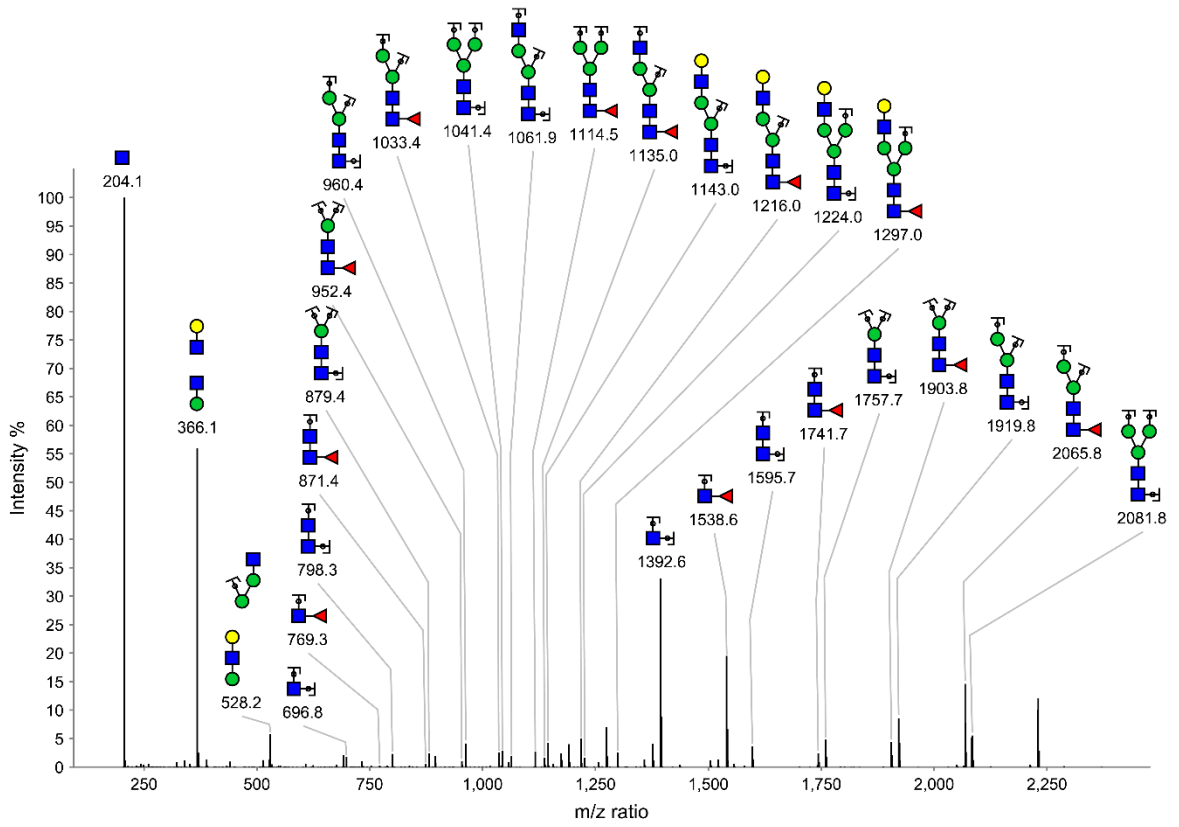

**IgG1 N297 Peptide 1: EEQYNSTYR**

| Glycoform | Data set | Exact mass | Charge | Calculated mass | Observed mass | Retention time | Comment   |
|-----------|----------|------------|--------|-----------------|---------------|----------------|-----------|
| 4-4-1-1   | NK06     | 3086.1868  | 3      | 1029.7359       | 1029.7335     | 18.9 to 20.3   | Annotated |

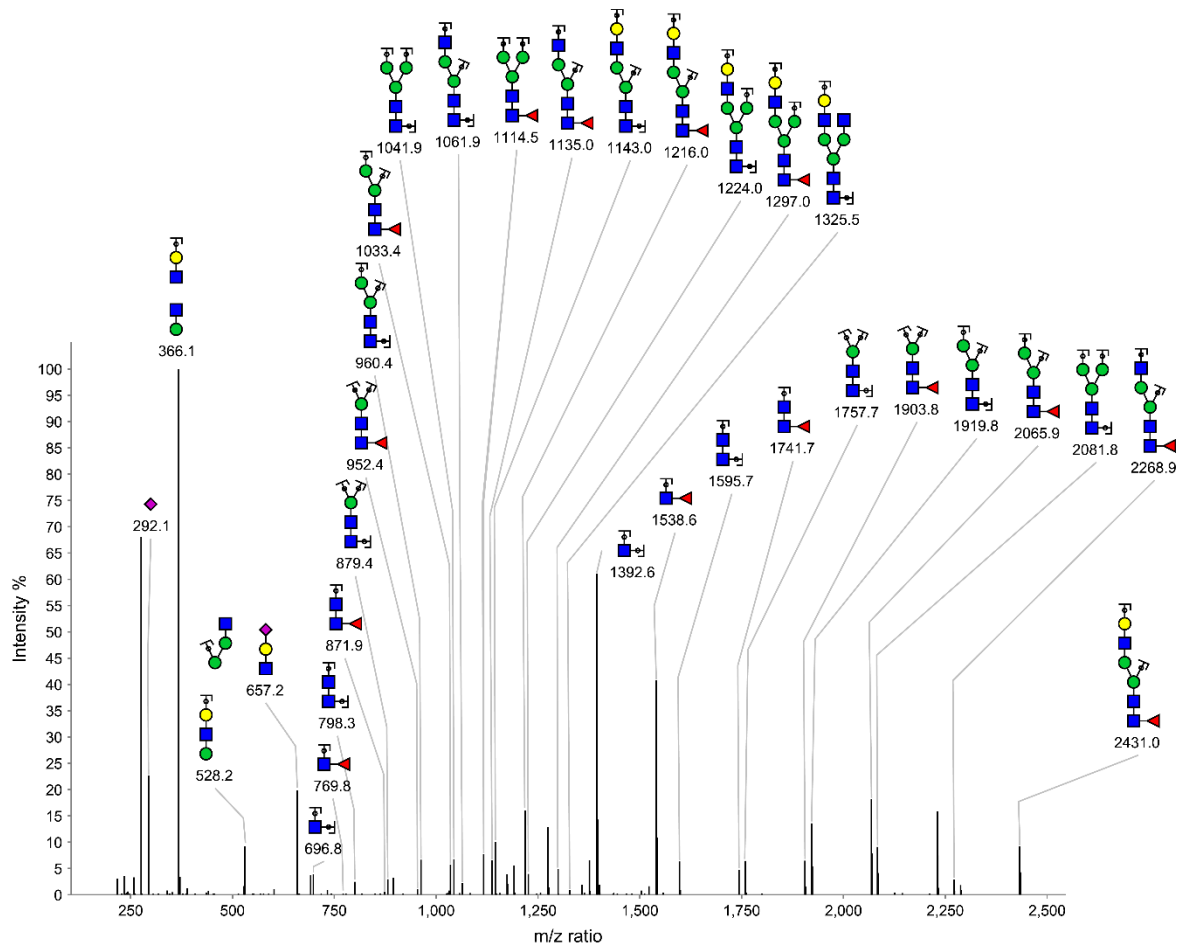

**IgG1 N297 Peptide 1: EEQYNSTYR**

| Glycoform | Data set | Exact mass | Charge | Calculated mass | Observed mass | Retention time | Comment   |
|-----------|----------|------------|--------|-----------------|---------------|----------------|-----------|
| 4-5-0-0   | NK06     | 2811.0863  | 3      | 938.0358        | 938.0337      | 16.4 to 17.5   | Annotated |

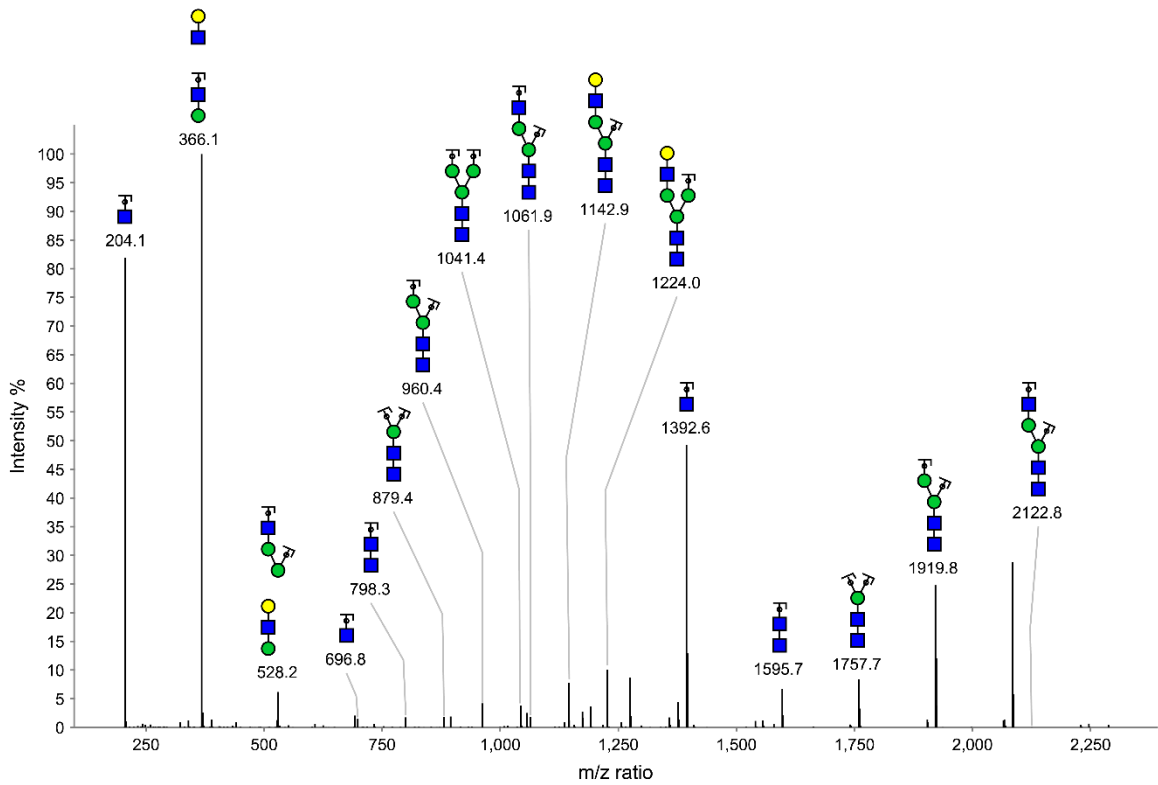

**IgG1 N297 Peptide 1: EEQYNSTYR**

| Glycoform | Data set | Exact mass | Charge | Calculated mass | Observed mass | Retention time | Comment   |
|-----------|----------|------------|--------|-----------------|---------------|----------------|-----------|
| 4-5-0-1   | NK06     | 3102.1817  | 3      | 1035.0676       | 1035.0679     | 19.2 to 20.3   | Annotated |

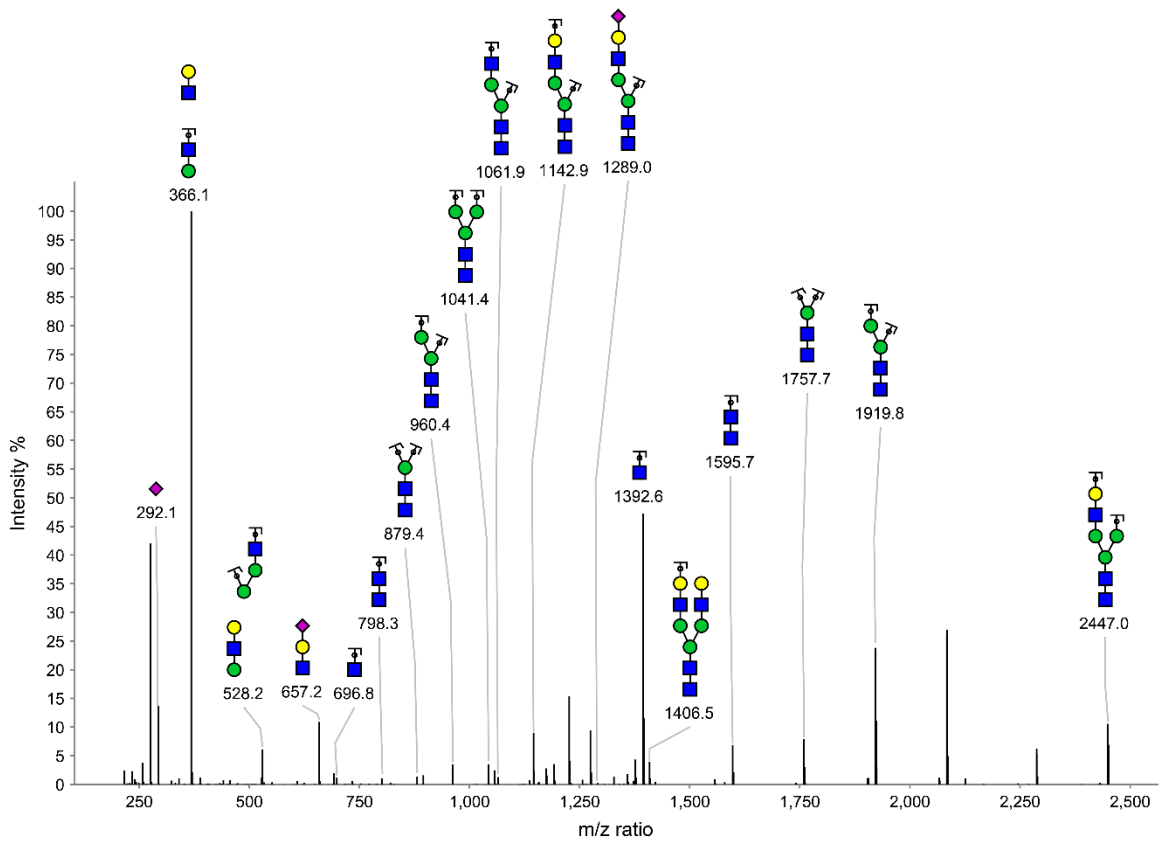

**IgG1 N297 Peptide 1: EEQYNSTYR**

| Glycoform | Data set | Exact mass | Charge | Calculated mass | Observed mass | Retention time | Comment   |
|-----------|----------|------------|--------|-----------------|---------------|----------------|-----------|
| 4-5-0-2   | NK06     | 3393.2771  | 3      | 1132.0994       | 1132.1003     | 22.1 to 22.9   | Annotated |

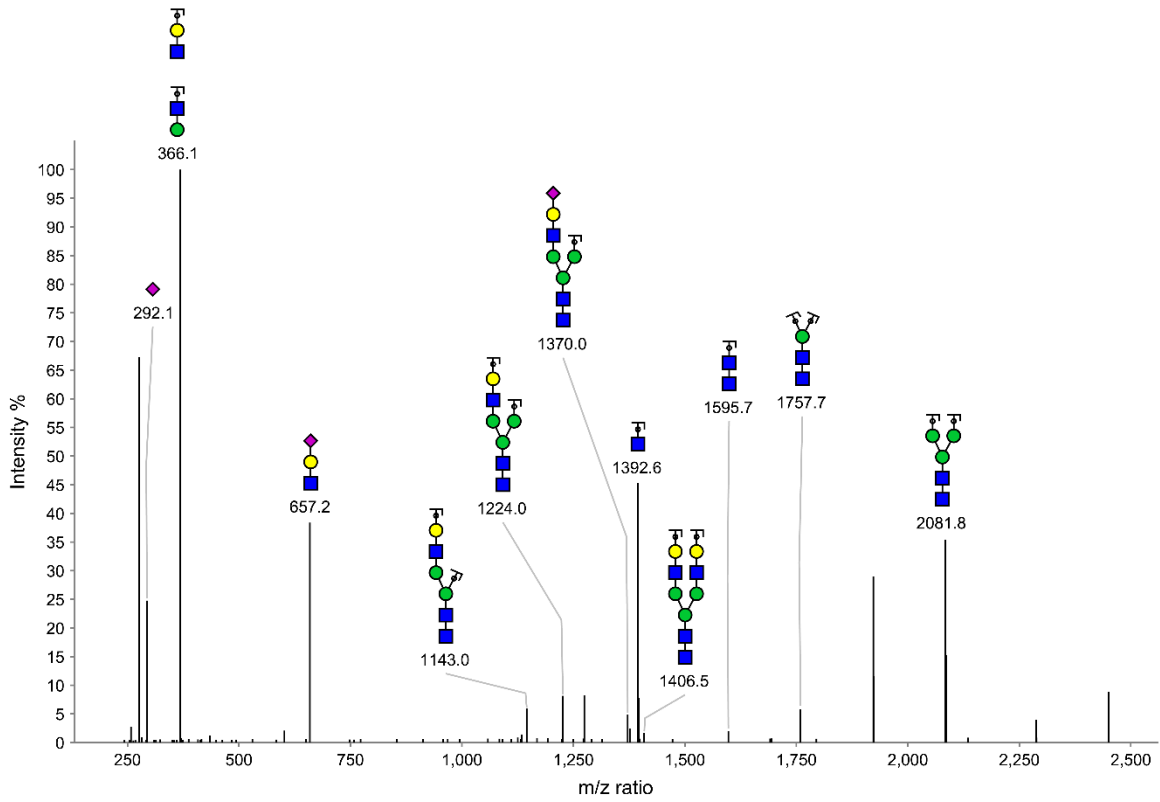

**IgG1 N297 Peptide 1: EEQYNSTYR**

| Glycoform | Data set | Exact mass | Charge | Calculated mass | Observed mass | Retention time | Comment   |
|-----------|----------|------------|--------|-----------------|---------------|----------------|-----------|
| 4-5-1-0   | NK06     | 2957.1442  | 3      | 986.7217        | 986.7191      | 16.5 to 17.4   | Annotated |

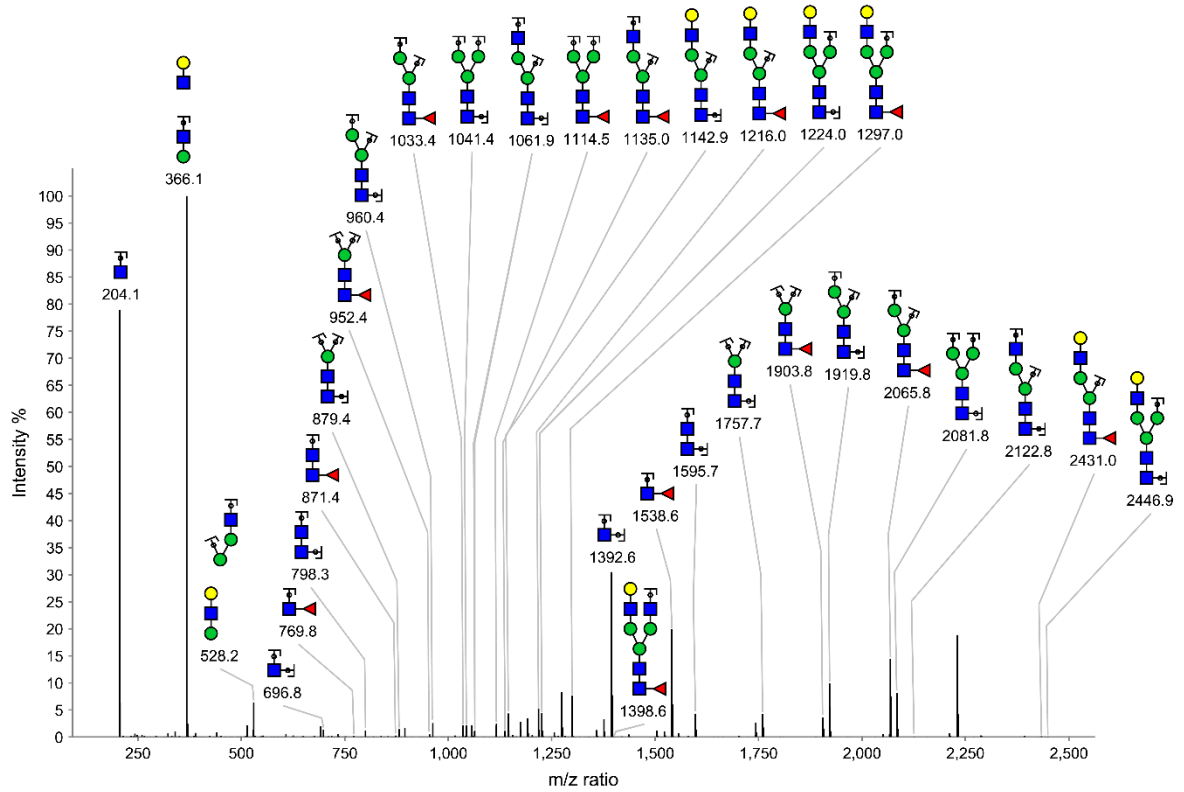

**IgG1 N297 Peptide 1: EEQYNSTYR**

| Glycoform | Data set | Exact mass | Charge | Calculated mass | Observed mass | Retention time | Comment   |
|-----------|----------|------------|--------|-----------------|---------------|----------------|-----------|
| 4-5-1-1   | NK06     | 3248.2396  | 3      | 1083.7535       | 1083.7533     | 19.0 to 20.0   | Annotated |

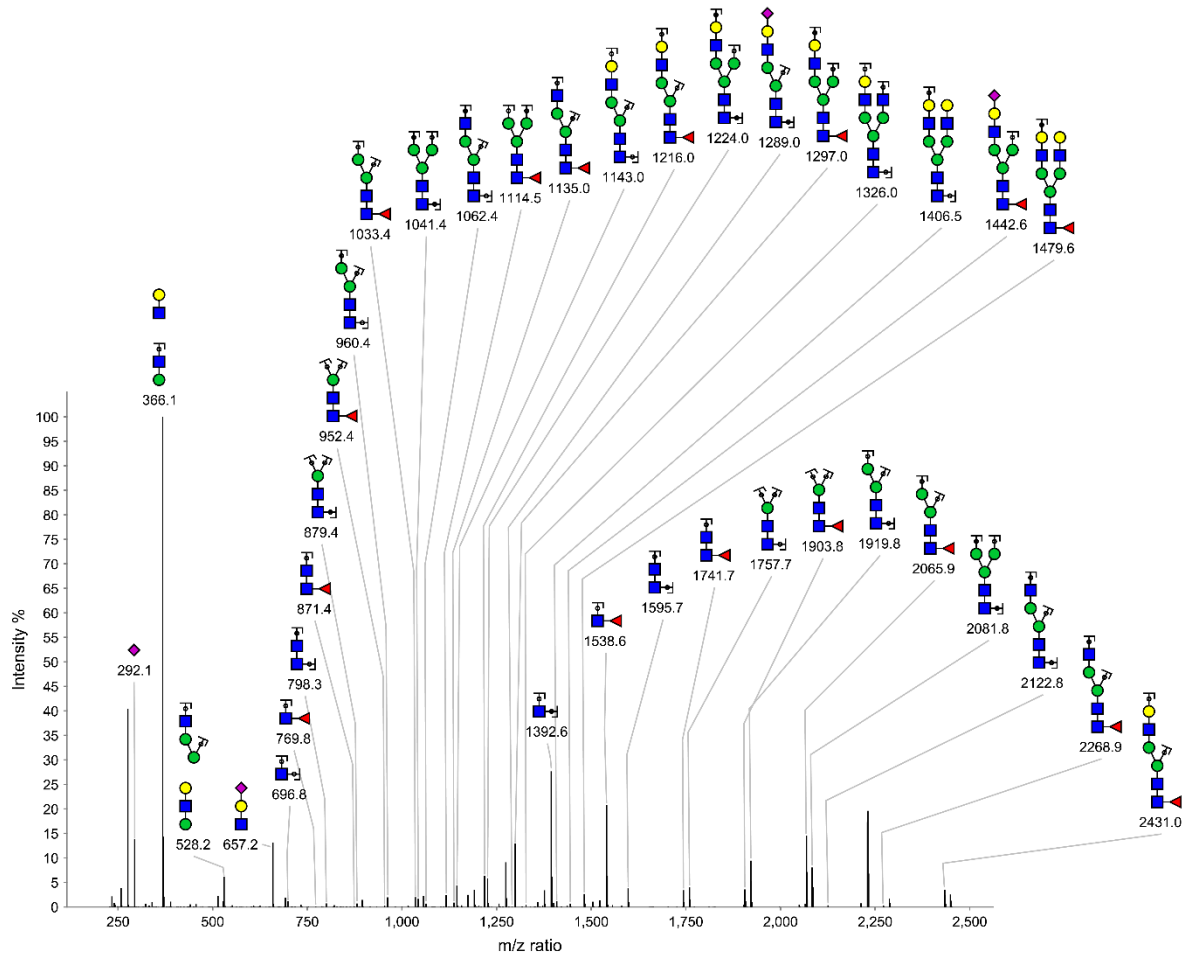

**IgG1 N297 Peptide 1: EEQYNSTYR**

| Glycoform | Data set | Exact mass | Charge | Calculated mass | Observed mass | Retention time | Comment   |
|-----------|----------|------------|--------|-----------------|---------------|----------------|-----------|
| 4-5-1-2   | NK06     | 3539.335   | 3      | 1180.7853       | 1180.7869     | 21.6 to 22.4   | Annotated |

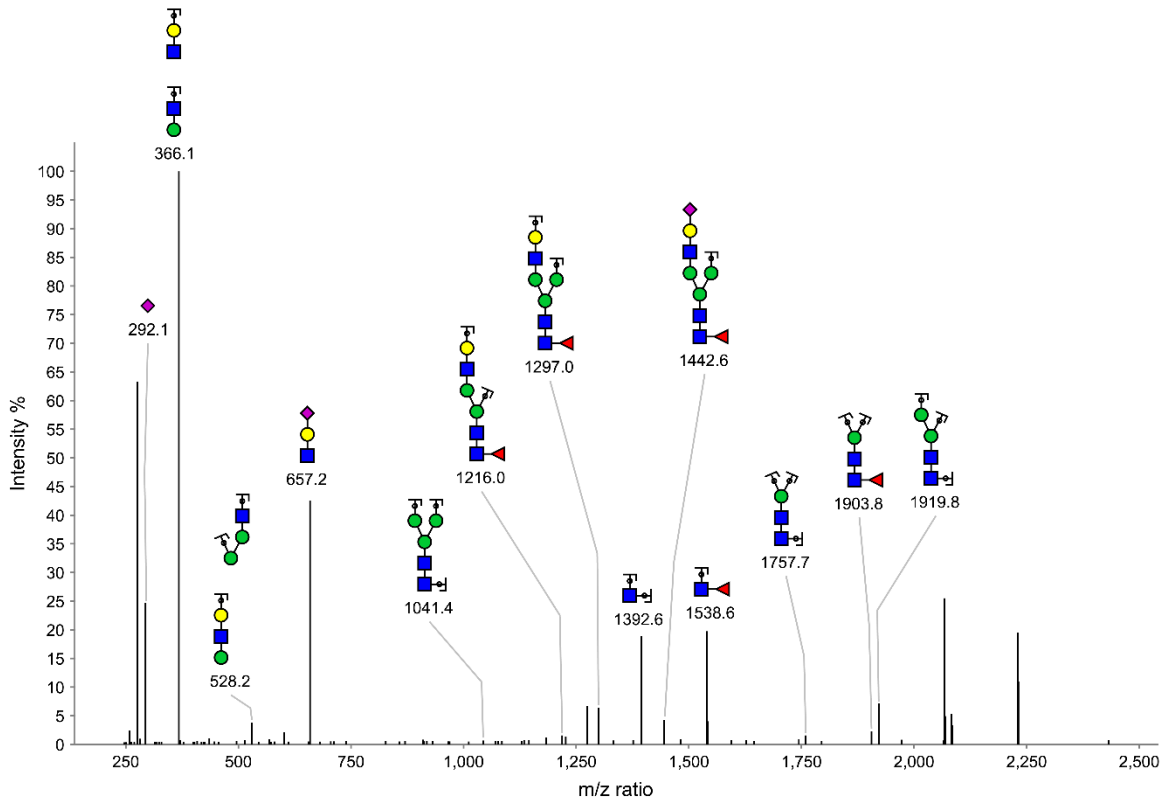

**IgG1 N297 Peptide 1: EEQYNSTYR**



| Glycoform | Data set | Exact mass | Charge | Calculated mass | Observed mass | Retention time | Comment   |
|-----------|----------|------------|--------|-----------------|---------------|----------------|-----------|
| 5-3-0-0   | NK06     | 2690.0601  | 3      | 897.6937        | 897.6928      | 20.0 to 21.3   | Annotated |

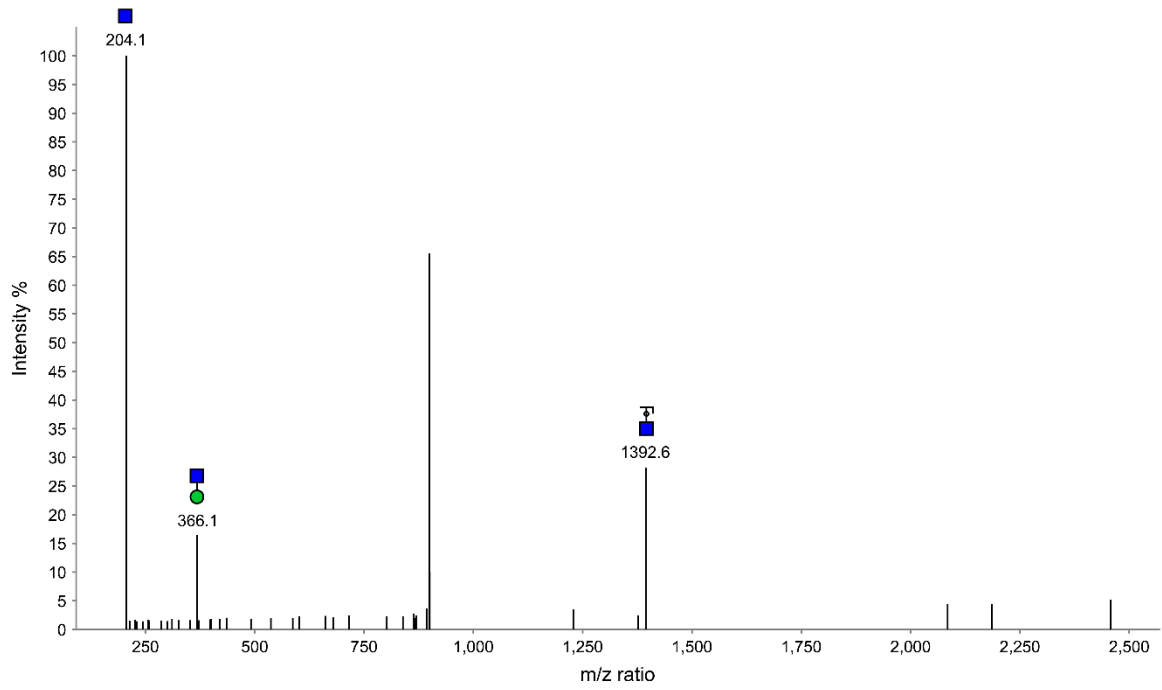

**IgG1 N297 Peptide 1: EEQYNSTYR**

| Glycoform | Data set | Exact mass | Charge | Calculated mass | Observed mass | Retention time | Comment   |
|-----------|----------|------------|--------|-----------------|---------------|----------------|-----------|
| 5-3-1-0   | NK06     | 2836.118   | 2      | 1419.0660       | 1419.054      | 17.3 to 18.1   | Annotated |

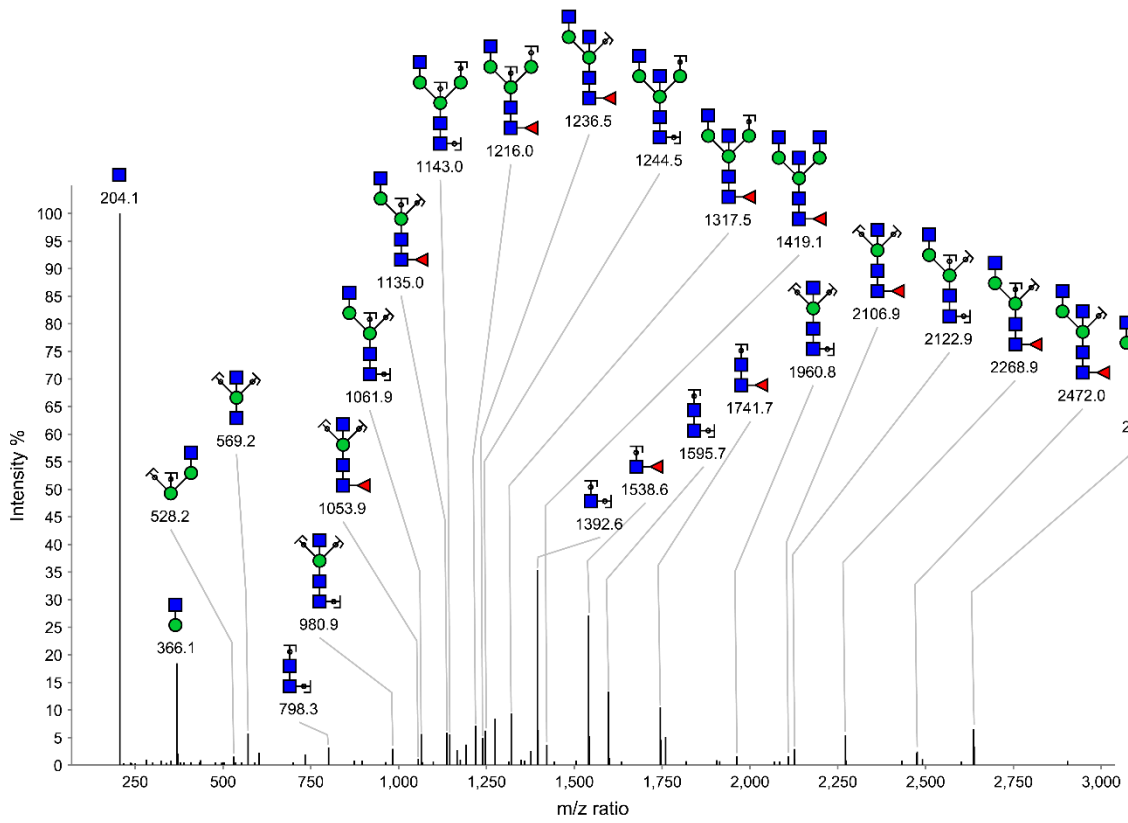

**IgG1 N297 Peptide 1: EEQYNSTYR**

| Glycoform | Data set | Exact mass | Charge | Calculated mass | Observed mass | Retention time | Comment   |
|-----------|----------|------------|--------|-----------------|---------------|----------------|-----------|
| 5-4-0-0   | NK06     | 2852.1129  | 3      | 951.7113        | 951.711       | 17.3 to 18.1   | Annotated |

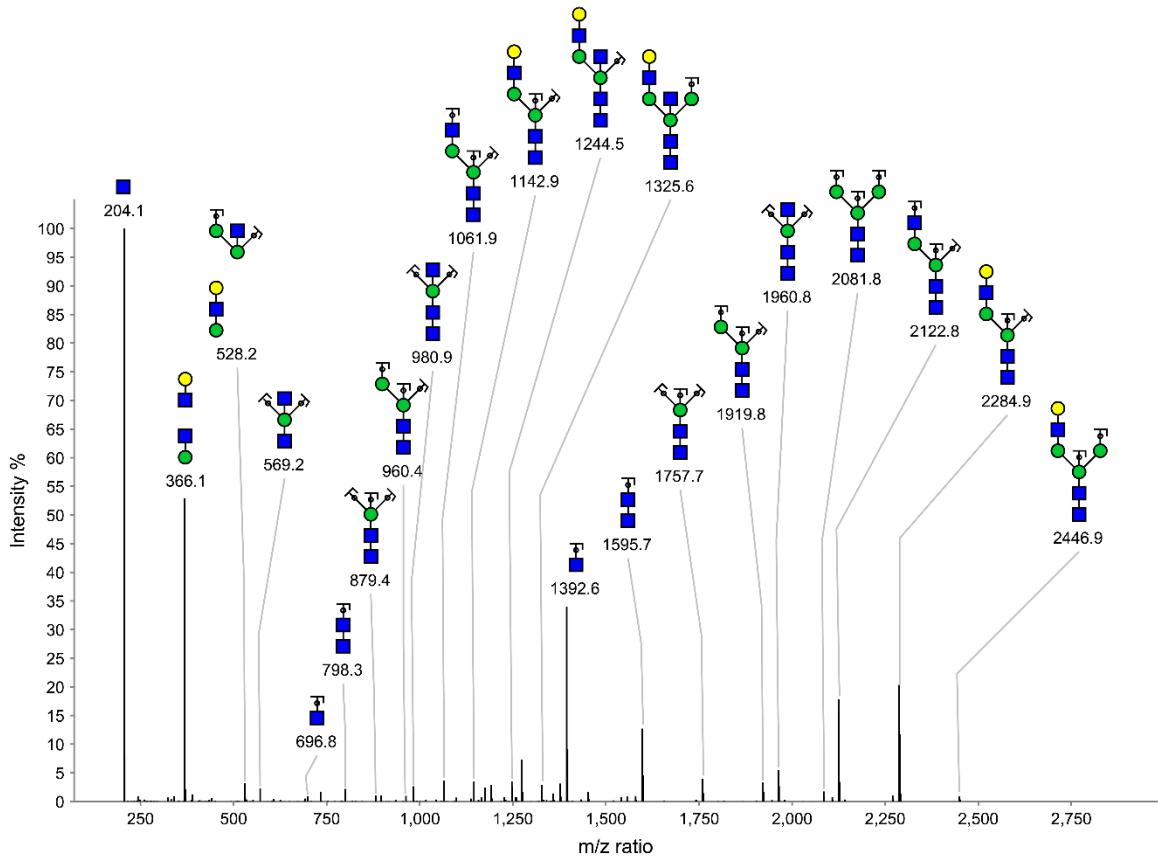

**IgG1 N297 Peptide 1: EEQYNSTYR**

| Glycoform | Data set | Exact mass | Charge | Calculated mass | Observed mass | Retention time | Comment   |
|-----------|----------|------------|--------|-----------------|---------------|----------------|-----------|
| 5-4-1-0   | NK06     | 2998.1708  | 3      | 1000.3973       | 1000.3969     | 17.0 to 18.1   | Annotated |

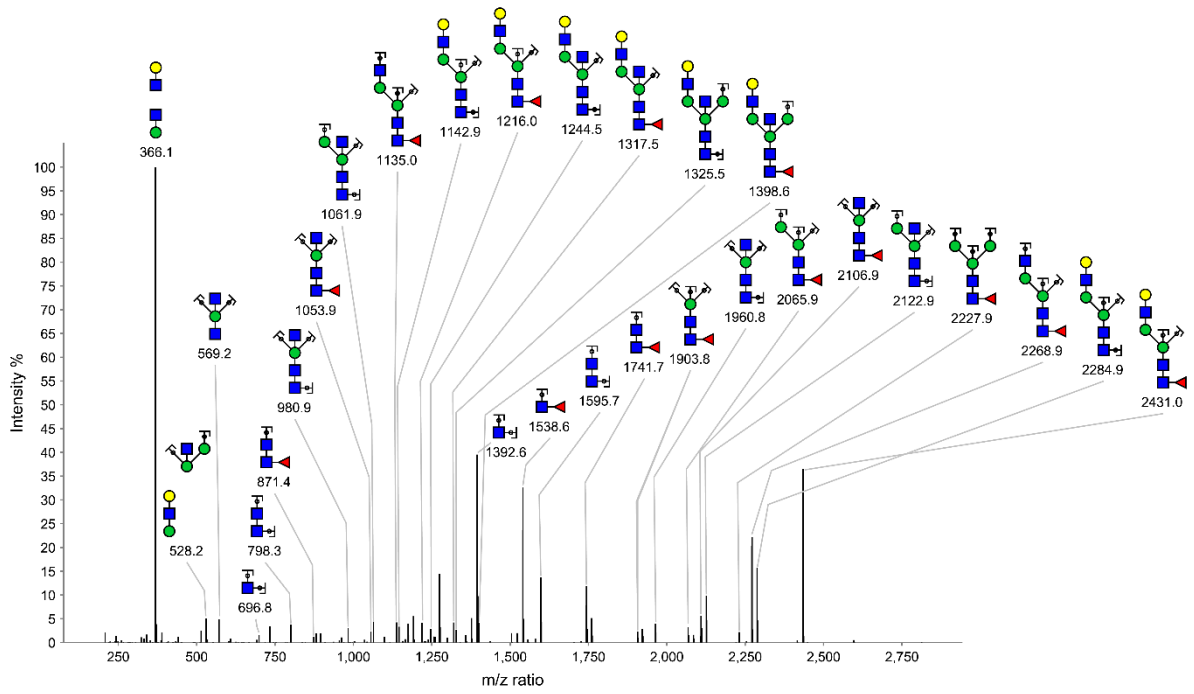

**IgG1 N297 Peptide 1: EEQYNSTYR**

| Glycoform | Data set | Exact mass | Charge | Calculated mass | Observed mass | Retention time | Comment   |
|-----------|----------|------------|--------|-----------------|---------------|----------------|-----------|
| 5-4-1-1   | NK01     | 3289.2662  | 3      | 1097.4291       | 1097.4207     | 19.5 to 20.3   | Annotated |

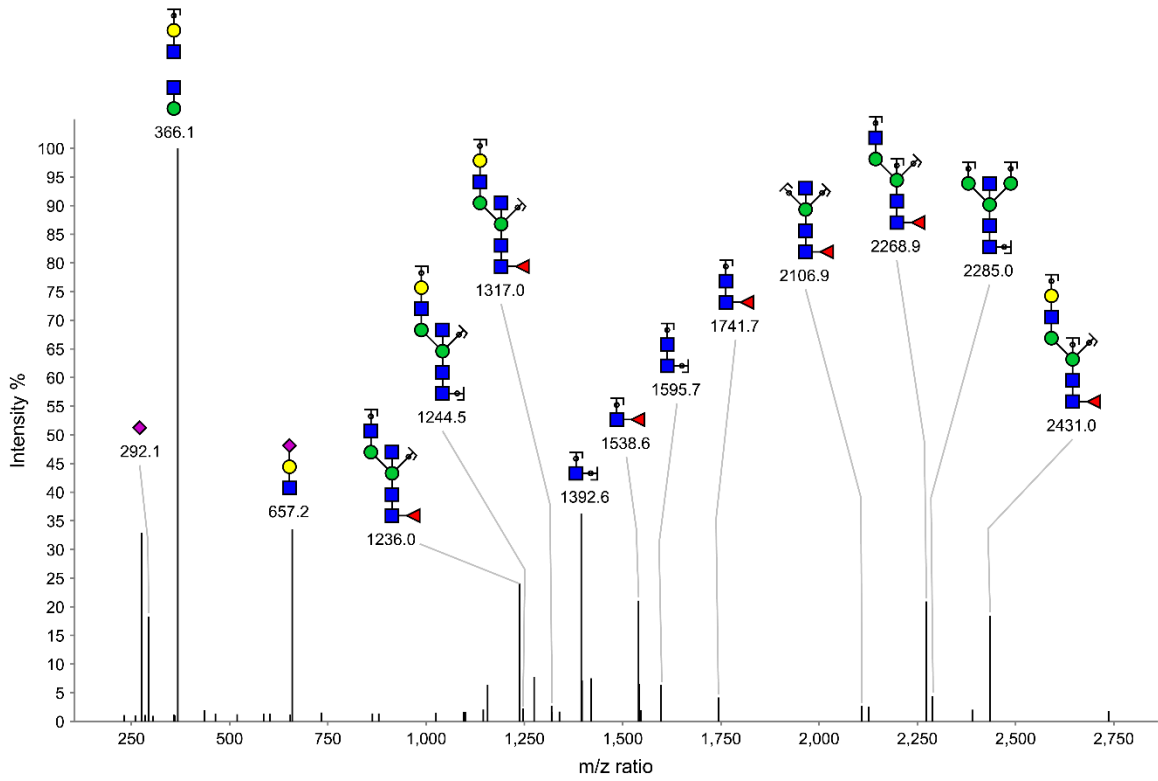

**IgG1 N297 Peptide 1: EEQYNSTYR**

| Glycoform | Data set | Exact mass | Charge | Calculated mass | Observed mass | Retention time | Comment   |
|-----------|----------|------------|--------|-----------------|---------------|----------------|-----------|
| 5-5-0-0   | NK06     | 3014.1657  | 3      | 1005.7289       | 1005.7285     | 17.0 to 18.1   | Annotated |

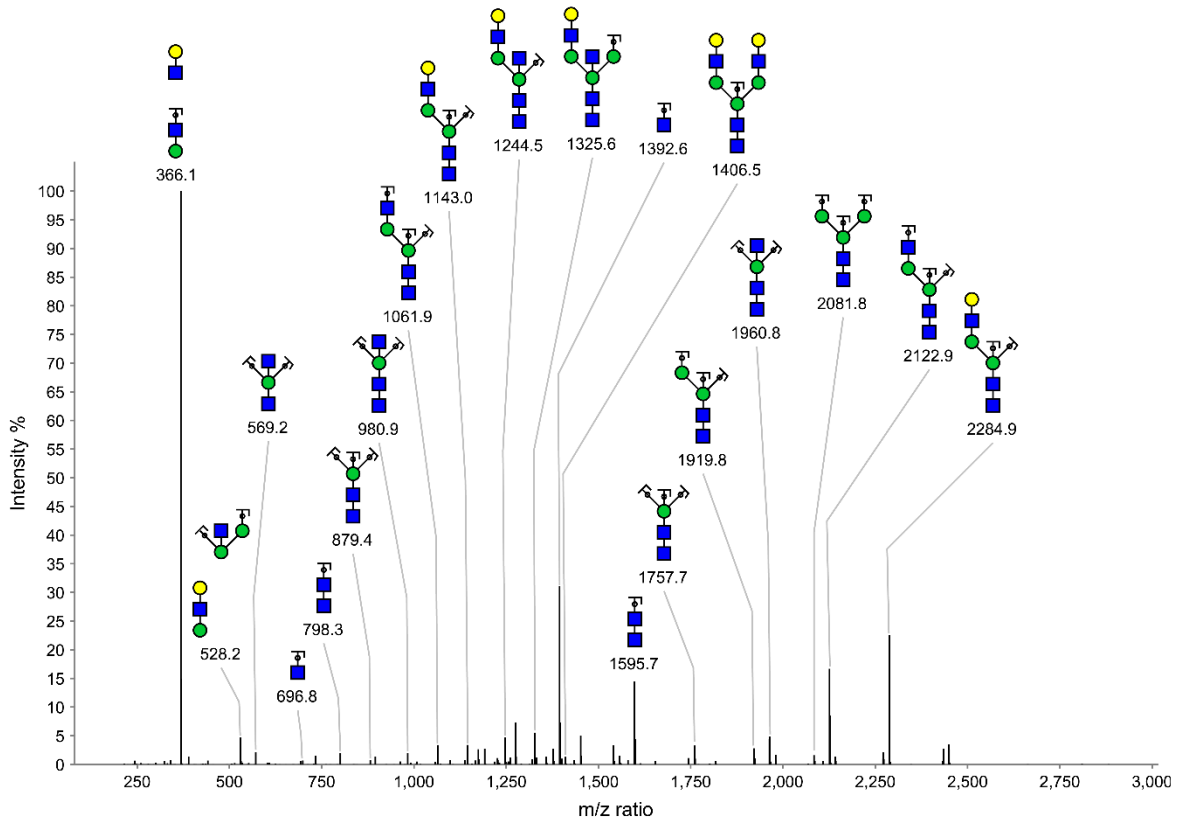

**IgG1 N297 Peptide 1: EEQYNSTYR**

| Glycoform | Data set | Exact mass | Charge | Calculated mass | Observed mass | Retention time | Comment   |
|-----------|----------|------------|--------|-----------------|---------------|----------------|-----------|
| 5-5-0-1   | NK06     | 3305.2611  | 3      | 1102.7607       | 1102.7598     | 19.4 to 20.7   | Annotated |

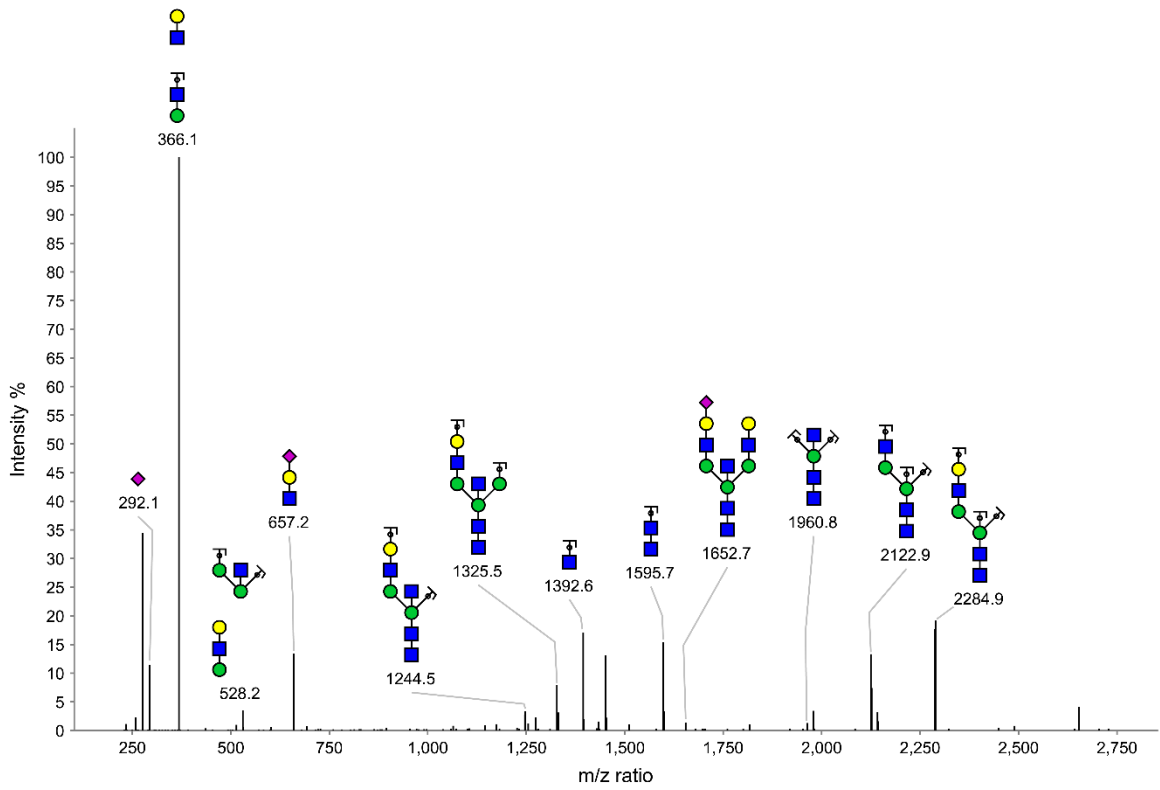

**IgG1 N297 Peptide 1: EEQYNSTYR**

| Glycoform | Data set | Exact mass | Charge | Calculated mass | Observed mass | Retention time | Comment   |
|-----------|----------|------------|--------|-----------------|---------------|----------------|-----------|
| 5-5-1-0   | NK06     | 3160.2236  | 3      | 1054.4149       | 1054.412      | 17.1 to 18.0   | Annotated |

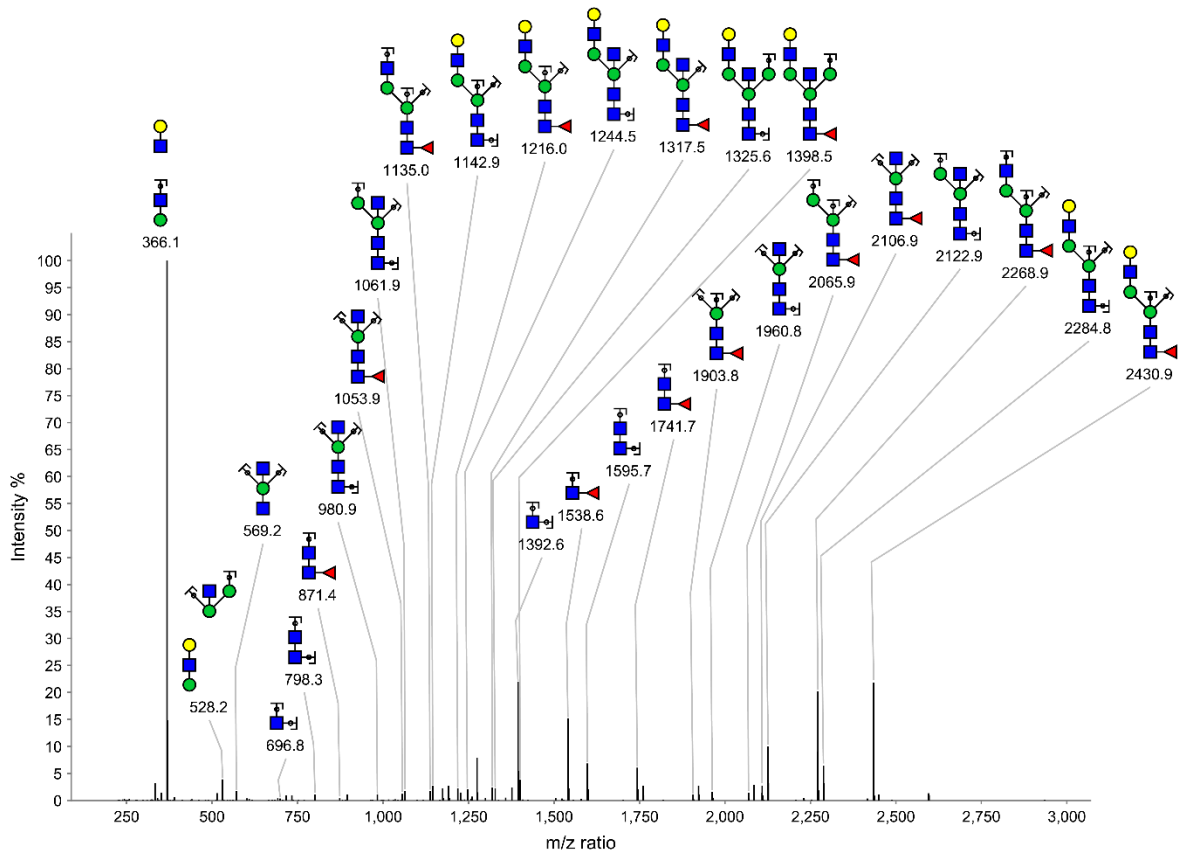

**IgG1 N297 Peptide 1: EEQYNSTYR**



| Glycoform | Data set | Exact mass | Charge | Calculated mass | Observed mass | Retention time | Comment |
|-----------|----------|------------|--------|-----------------|---------------|----------------|---------|
| 5-5-1-1   | NK06     | 3451.319   | 3      | 1151.4467       | 1151.4519     | 19.2 to 20.7   | No MS2  |
| 3-4-1-1   | NK08     | 2883.1074  | 3      | 962.0428        | 962.0271      | 19.0 to 20.0   | No MS2  |

**IgG1 N297 Peptide 1: EEQYNSTYR**

| Glycoform | Data set | Exact mass | Charge | Calculated mass | Observed mass | Retention time | Comment   |
|-----------|----------|------------|--------|-----------------|---------------|----------------|-----------|
| 4-3-0-0   | NK13     | 2969.2772  | 4      | 743.3263        | 743.3276      | 36.9 to 39.8   | Annotated |

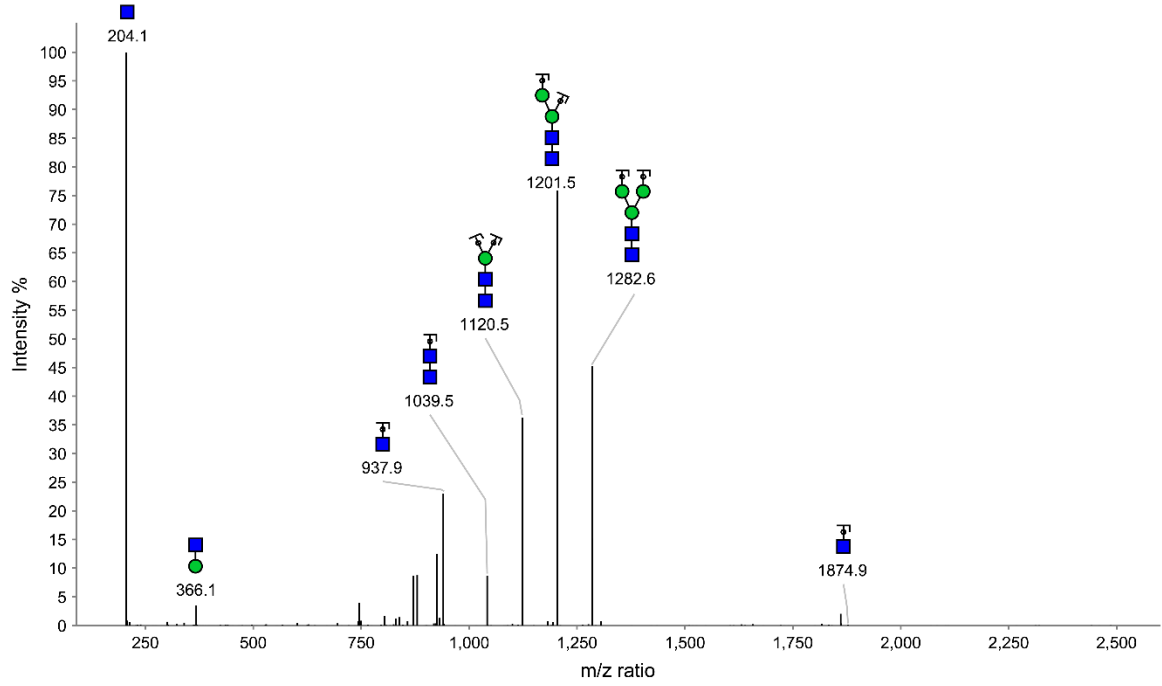

**IgG1 N297 Peptide 2: TKPREEQYNSTYR**

| Glycoform | Data set | Exact mass | Charge | Calculated mass | Observed mass | Retention time | Comment   |
|-----------|----------|------------|--------|-----------------|---------------|----------------|-----------|
| 4-3-1-0   | NK13     | 3115.3351  | 4      | 779.8408        | 779.8414      | 35.9 to 39.0   | Annotated |

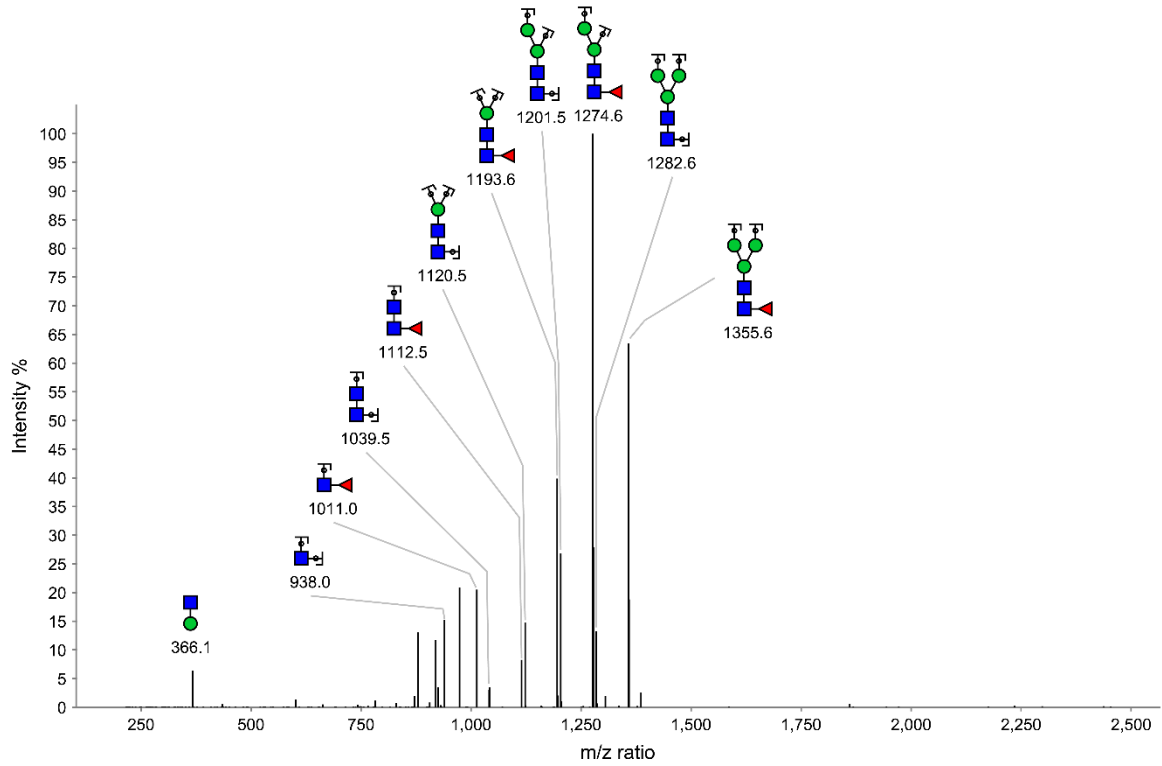

**IgG1 N297 Peptide 2: TKPREEQYNSTYR**

| Glycoform | Data set | Exact mass | Charge | Calculated mass | Observed mass | Retention time | Comment   |
|-----------|----------|------------|--------|-----------------|---------------|----------------|-----------|
| 4-4-0-0   | NK13     | 3131.33    | 4      | 783.8395        | 783.8405      | 35.9 to 39.7   | Annotated |

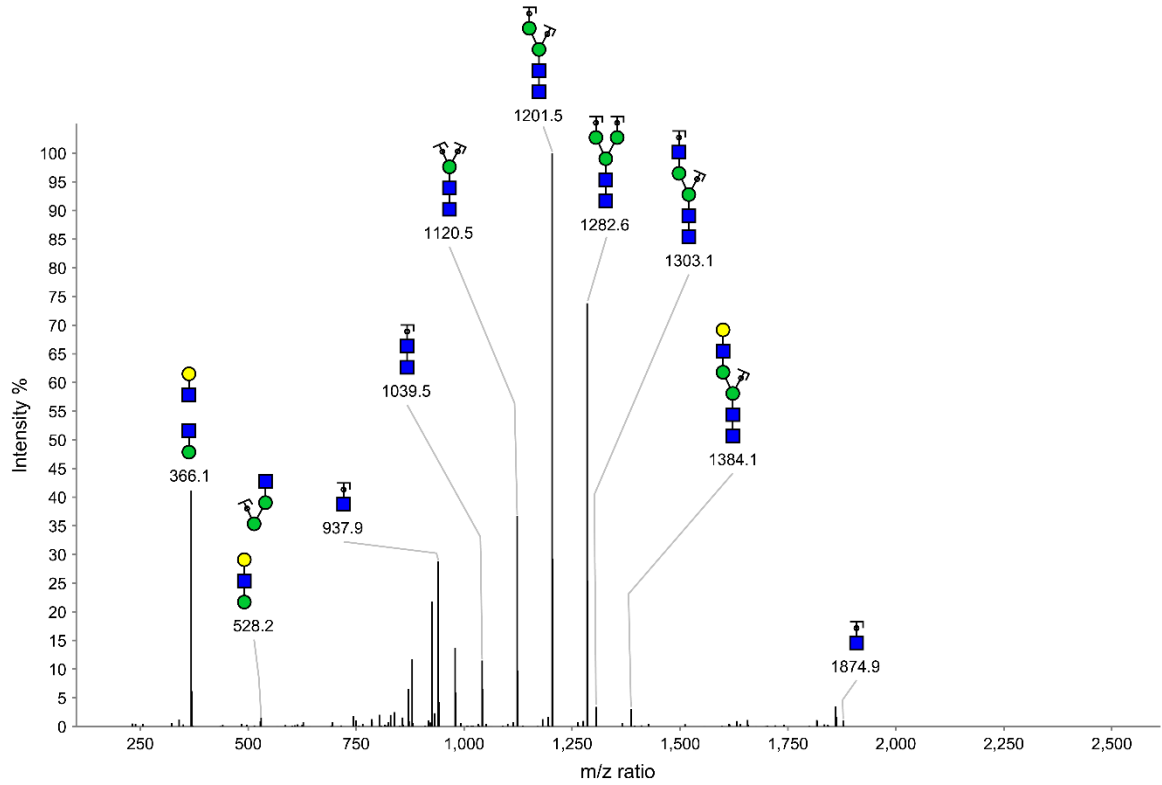

**IgG1 N297 Peptide 2: TKPREEQYNSTYR**

| Glycoform | Data set | Exact mass | Charge | Calculated mass | Observed mass | Retention time | Comment   |
|-----------|----------|------------|--------|-----------------|---------------|----------------|-----------|
| 4-4-0-1   | NK13     | 3422.4254  | 4      | 856.6134        | 856.6139      | 31.6 to 34.2   | Annotated |

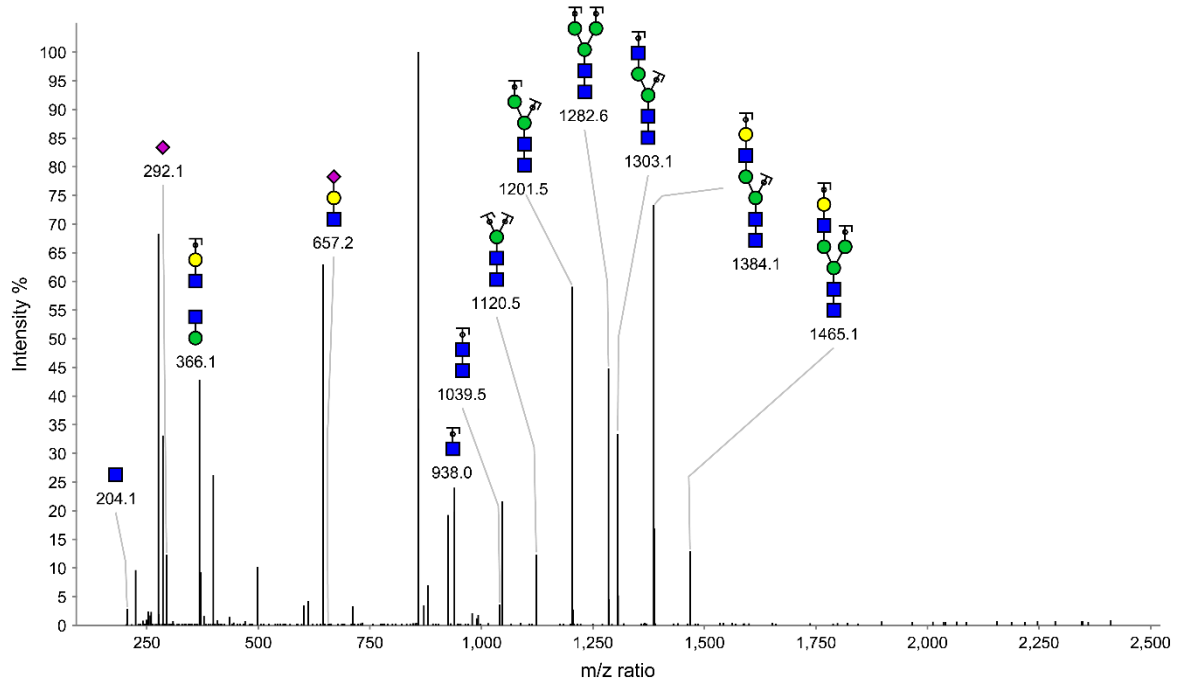

**IgG1 N297 Peptide 2: TKPREEQYNSTYR**

| Glycoform | Data set | Exact mass | Charge | Calculated mass | Observed mass | Retention time | Comment   |
|-----------|----------|------------|--------|-----------------|---------------|----------------|-----------|
| 4-4-1-0   | NK13     | 3277.3879  | 4      | 820.3540        | 820.3547      | 35.7 to 38.8   | Annotated |

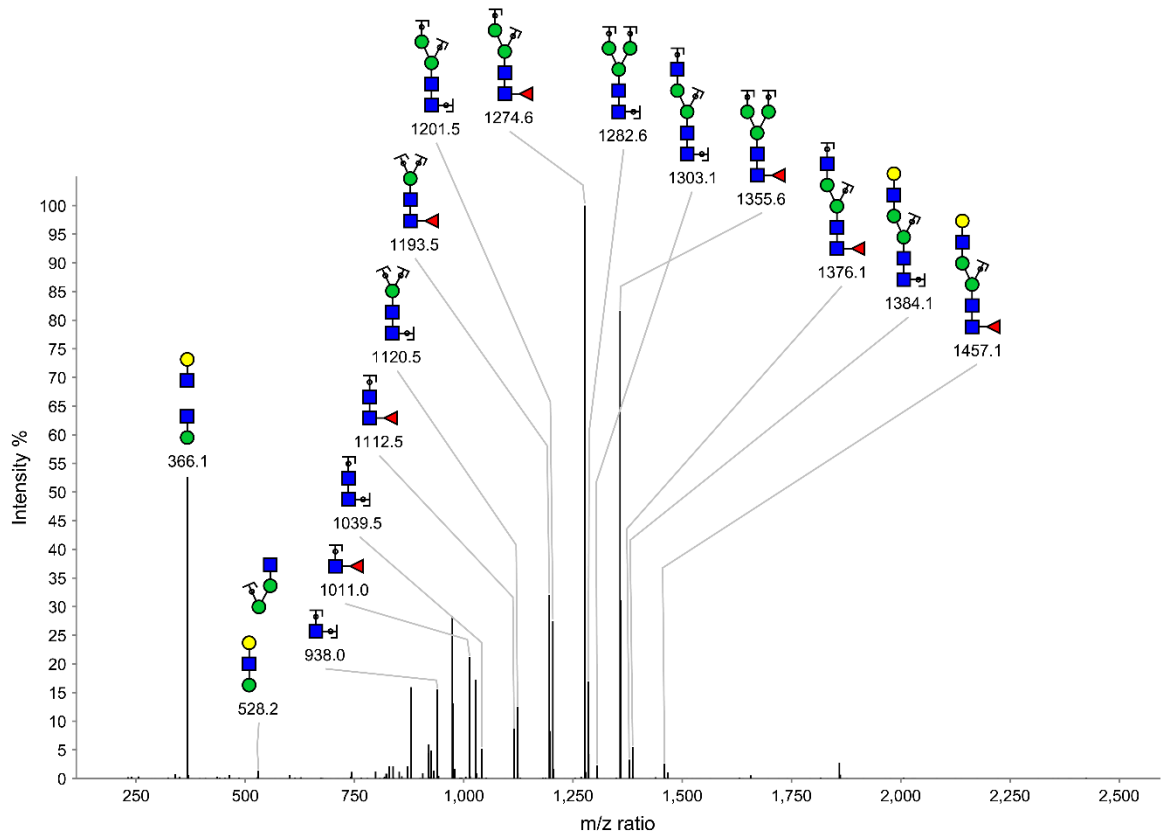

**IgG1 N297 Peptide 2: TKPREEQYNSTYR**

| Glycoform | Data set | Exact mass | Charge | Calculated mass | Observed mass | Retention time | Comment   |
|-----------|----------|------------|--------|-----------------|---------------|----------------|-----------|
| 4-4-1-1   | NK13     | 3568.4833  | 4      | 893.1278        | 893.1255      | 31.1 to 33.4   | Annotated |

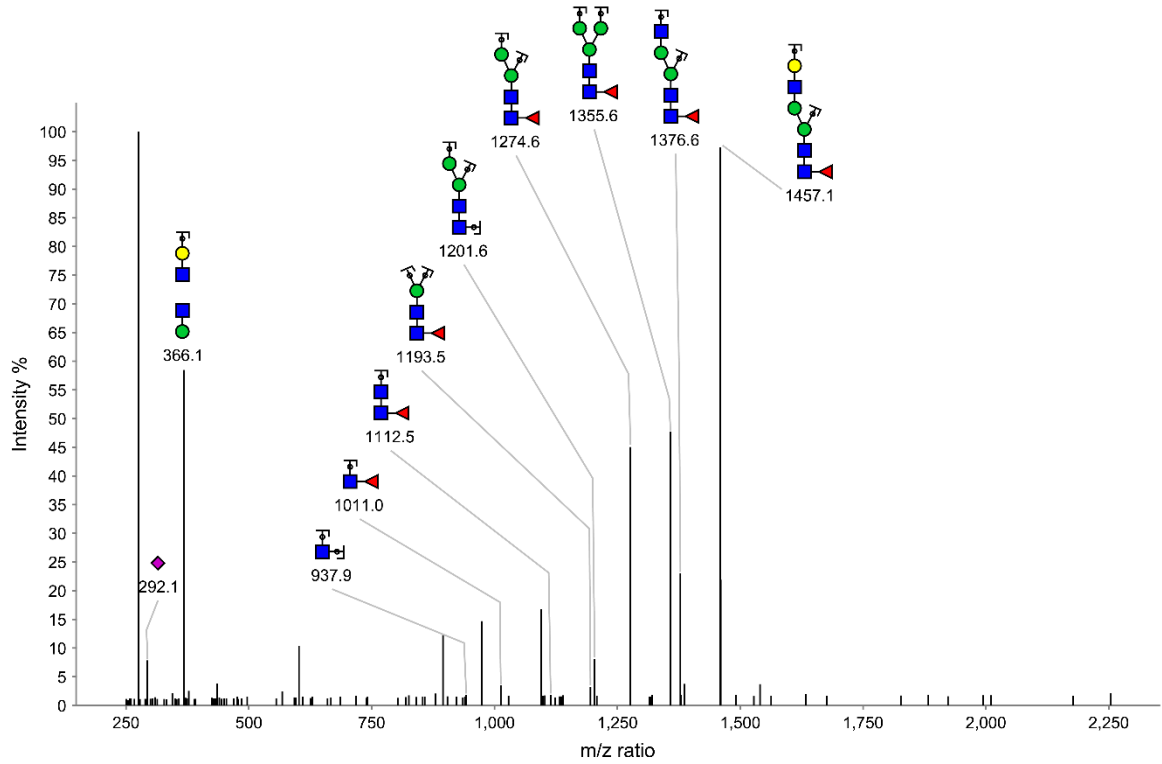

**IgG1 N297 Peptide 2: TKPREEQYNSTYR**

| Glycoform | Data set | Exact mass | Charge | Calculated mass | Observed mass | Retention time | Comment   |
|-----------|----------|------------|--------|-----------------|---------------|----------------|-----------|
| 4-5-0-0   | NK13     | 3293.3828  | 4      | 824.3527        | 824.3533      | 35.2 to 39.3   | Annotated |

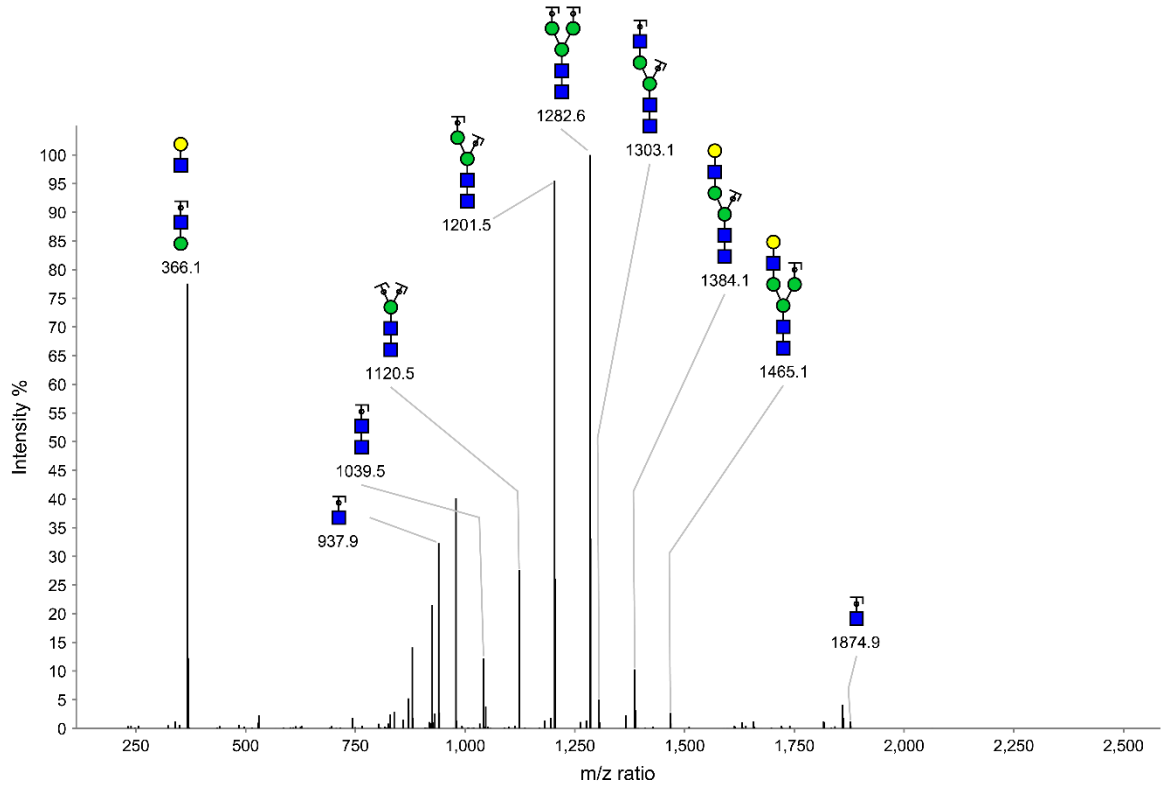

**IgG1 N297 Peptide 2: TKPREEQYNSTYR**



| Glycoform | Data set | Exact mass | Charge | Calculated mass | Observed mass | Retention time | Comment   |
|-----------|----------|------------|--------|-----------------|---------------|----------------|-----------|
| 4-5-0-1   | NK13     | 3584.4782  | 4      | 897.1266        | 897.1277      | 30.2 to 34.5   | Annotated |

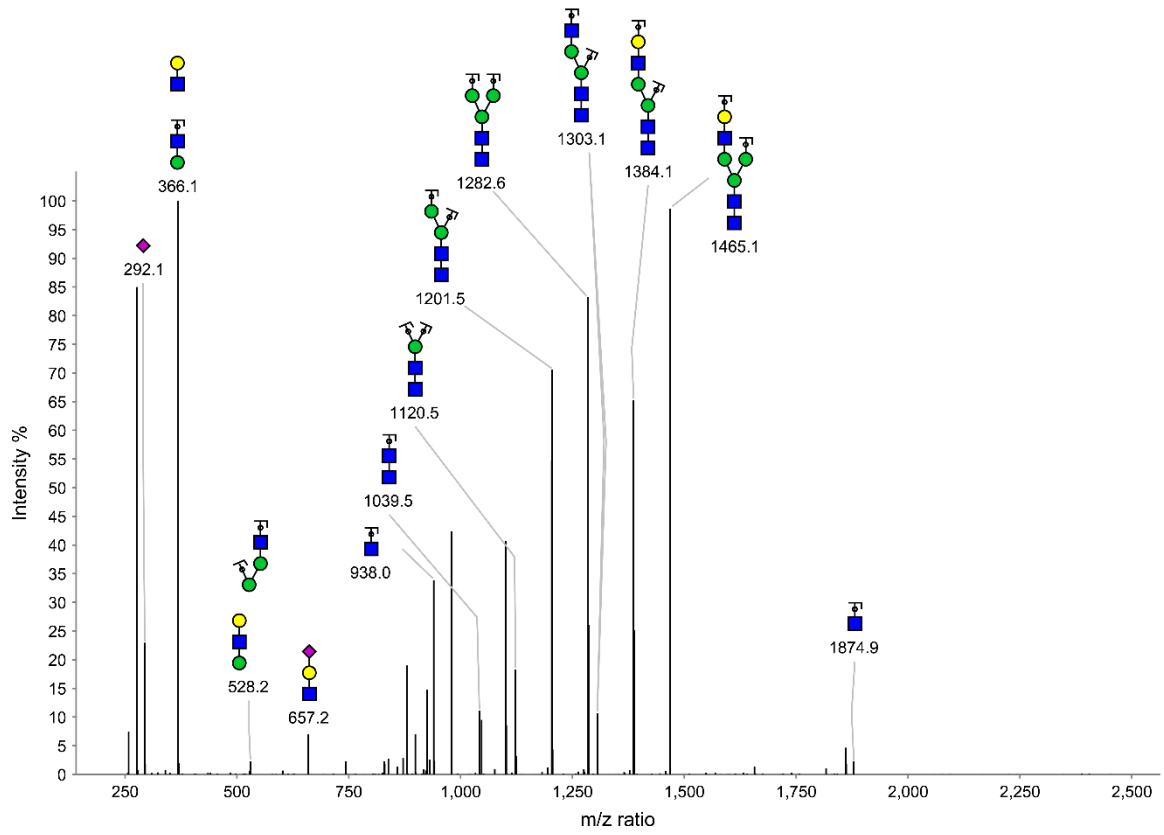

**IgG1 N297 Peptide 2: TKPREEQYNSTYR**

| Glycoform | Data set | Exact mass | Charge | Calculated mass | Observed mass | Retention time | Comment   |
|-----------|----------|------------|--------|-----------------|---------------|----------------|-----------|
| 4-5-1-0   | NK13     | 3439.4407  | 4      | 860.8672        | 860.8674      | 35.0 to 38.9   | Annotated |

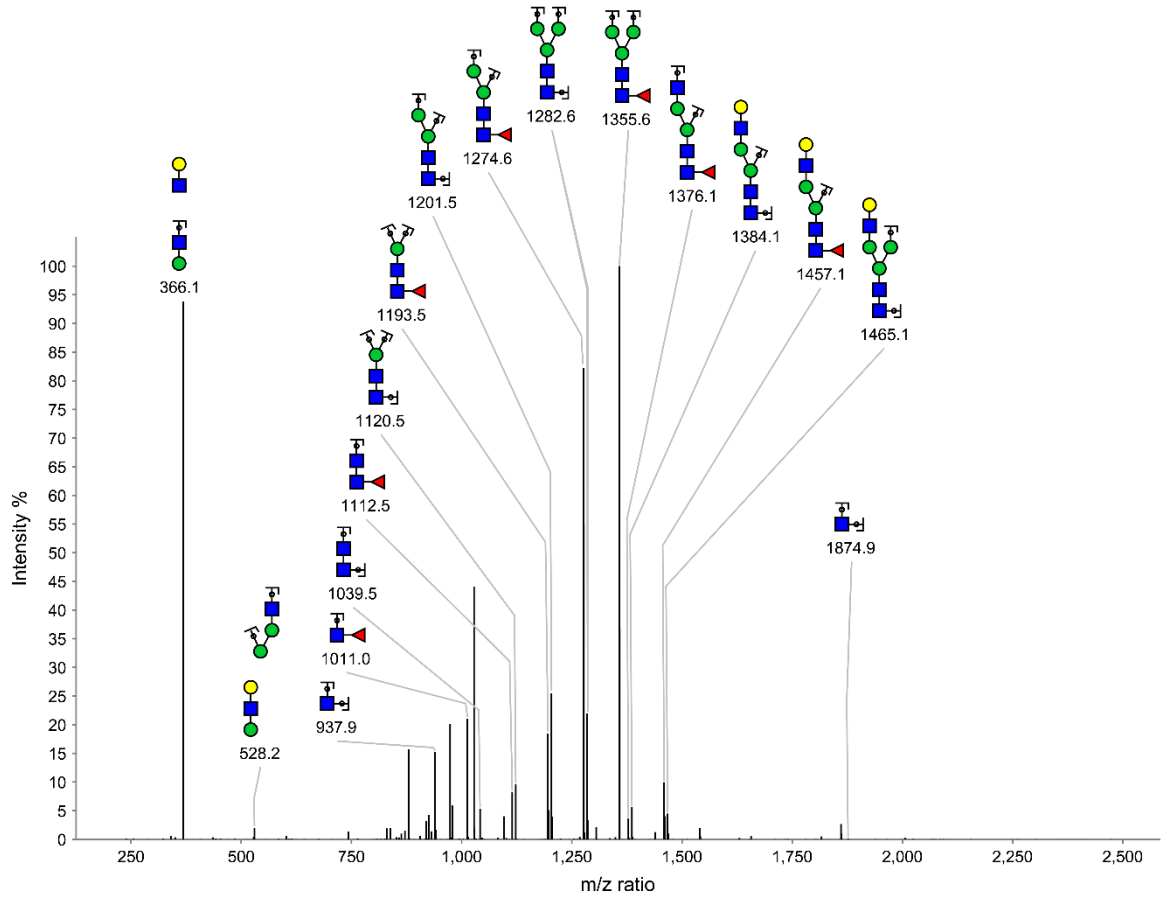

**IgG1 N297 Peptide 2: TKPREEQYNSTYR**

| Glycoform | Data set | Exact mass | Charge | Calculated mass | Observed mass | Retention time | Comment   |
|-----------|----------|------------|--------|-----------------|---------------|----------------|-----------|
| 4-5-1-1   | NK13     | 3730.5361  | 4      | 933.6410        | 933.6423      | 29.7 to 33.4   | Annotated |

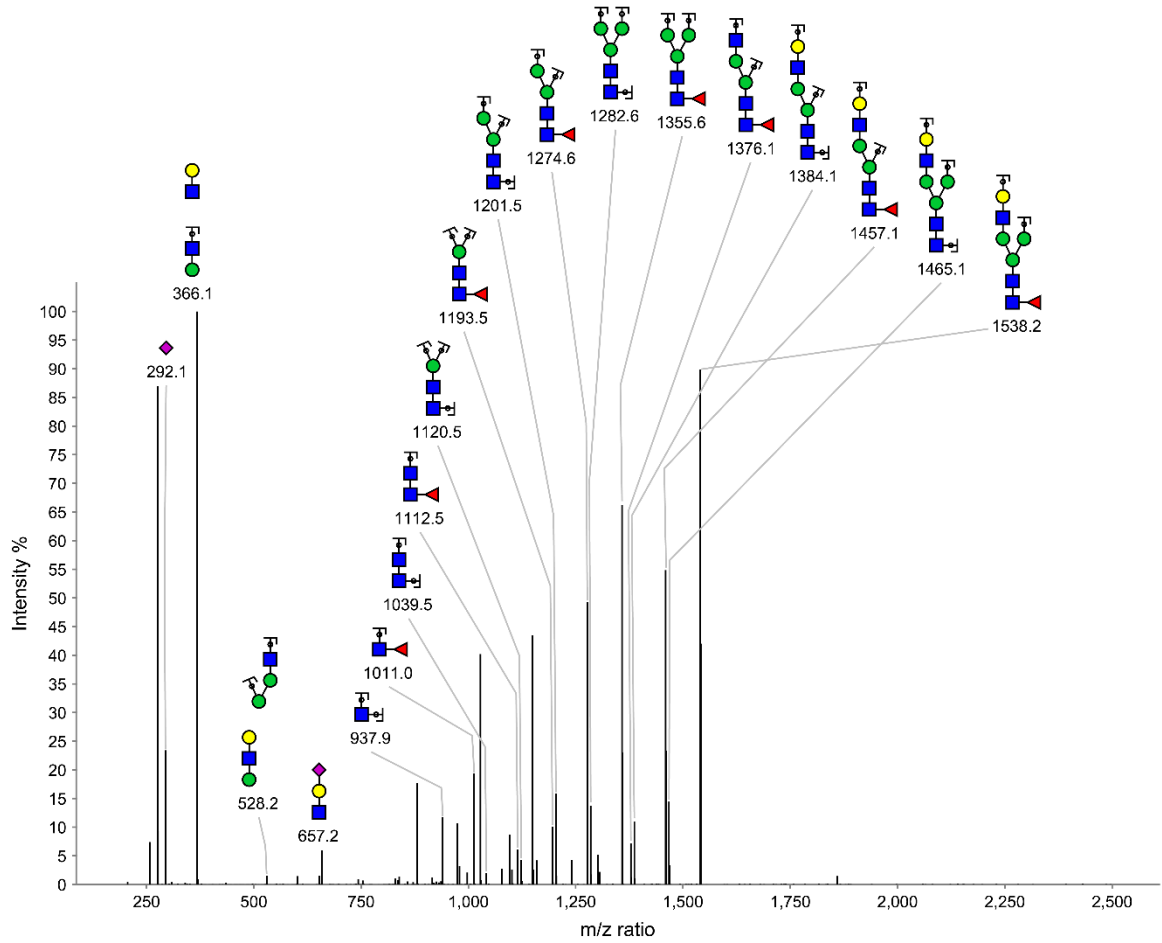

**IgG1 N297 Peptide 2: TKPREEQYNSTYR**

| Glycoform | Data set | Exact mass | Charge | Calculated mass | Observed mass | Retention time | Comment   |
|-----------|----------|------------|--------|-----------------|---------------|----------------|-----------|
| 5-3-0-0   | NK13     | 3172.3566  | 4      | 794.0962        | 794.0978      | 36.7 to 39.5   | Annotated |

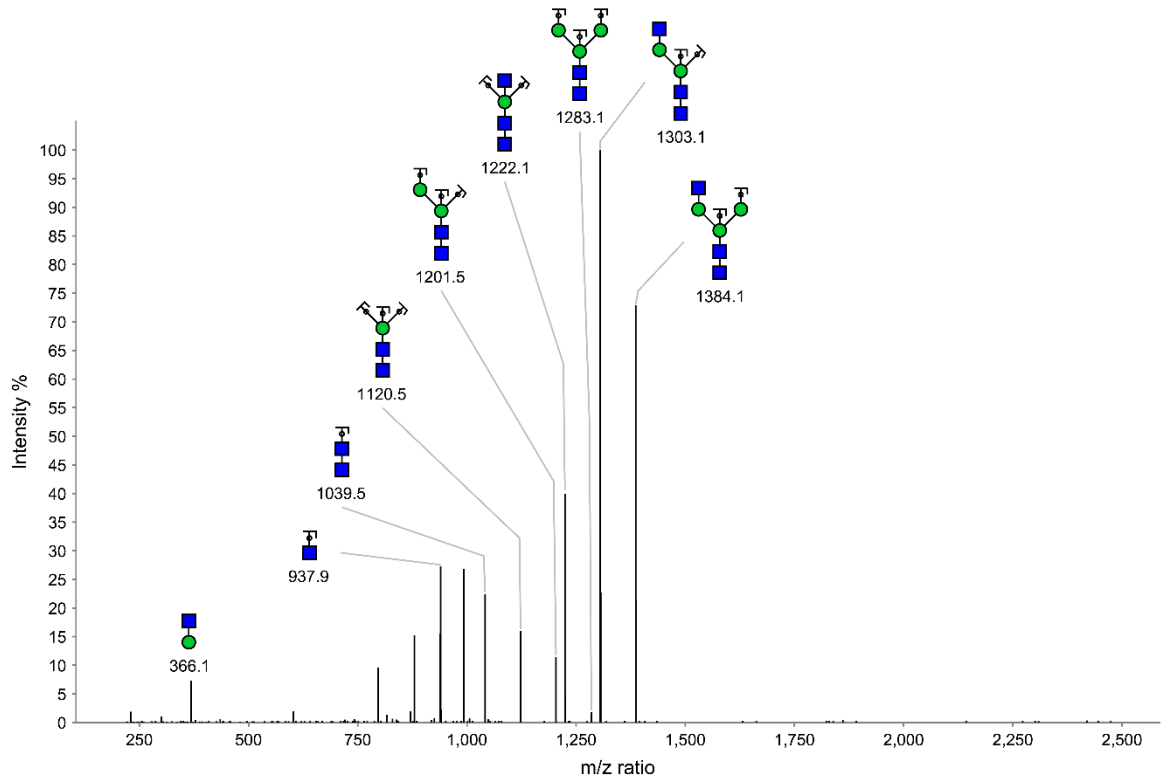

**IgG1 N297 Peptide 2: TKPREEQYNSTYR**

| Glycoform | Data set | Exact mass | Charge | Calculated mass | Observed mass | Retention time | Comment   |
|-----------|----------|------------|--------|-----------------|---------------|----------------|-----------|
| 5-4-0-0   | NK13     | 3334.4094  | 4      | 834.6094        | 834.6102      | 35.5 to 39.7   | Annotated |

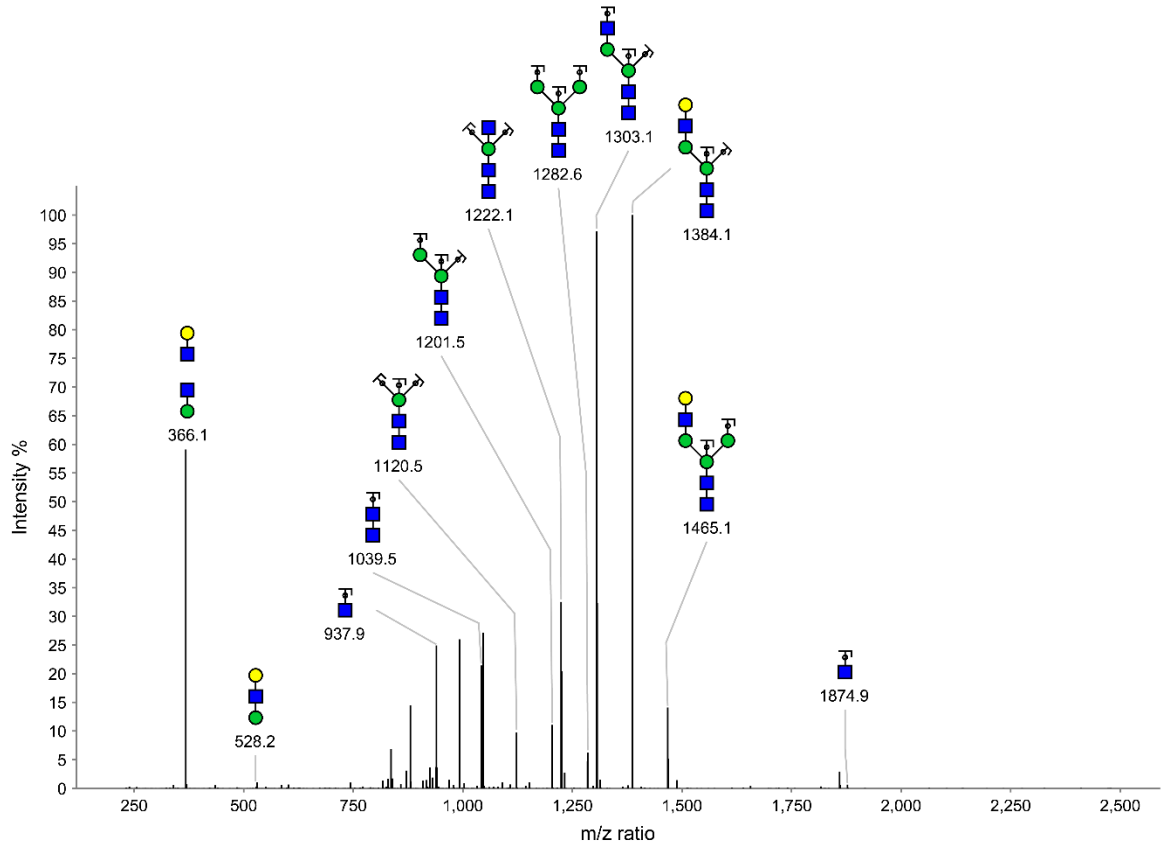

**IgG1 N297 Peptide 2: TKPREEQYNSTYR**

| Glycoform | Data set | Exact mass | Charge | Calculated mass | Observed mass | Retention time | Comment   |
|-----------|----------|------------|--------|-----------------|---------------|----------------|-----------|
| 5-4-1-0   | NK13     | 3480.4673  | 4      | 871.1238        | 871.1244      | 35.6 to 38.8   | Annotated |

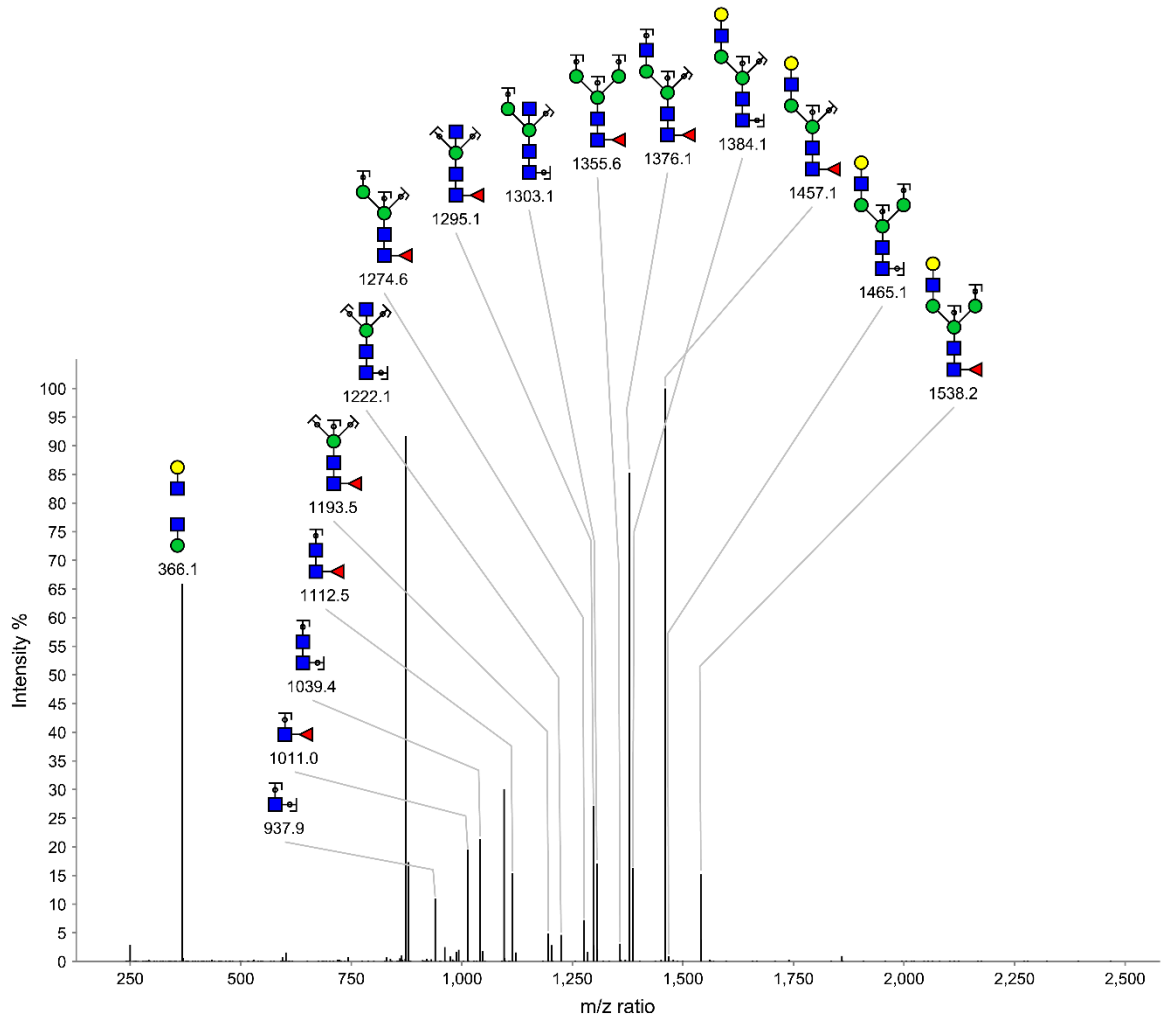

**IgG1 N297 Peptide 2: TKPREEQYNSTYR**

| Glycoform | Data set | Exact mass | Charge | Calculated mass | Observed mass | Retention time | Comment   |
|-----------|----------|------------|--------|-----------------|---------------|----------------|-----------|
| 5-5-0-0   | NK13     | 3496.4622  | 4      | 875.1226        | 875.1233      | 35.2 to 39.1   | Annotated |

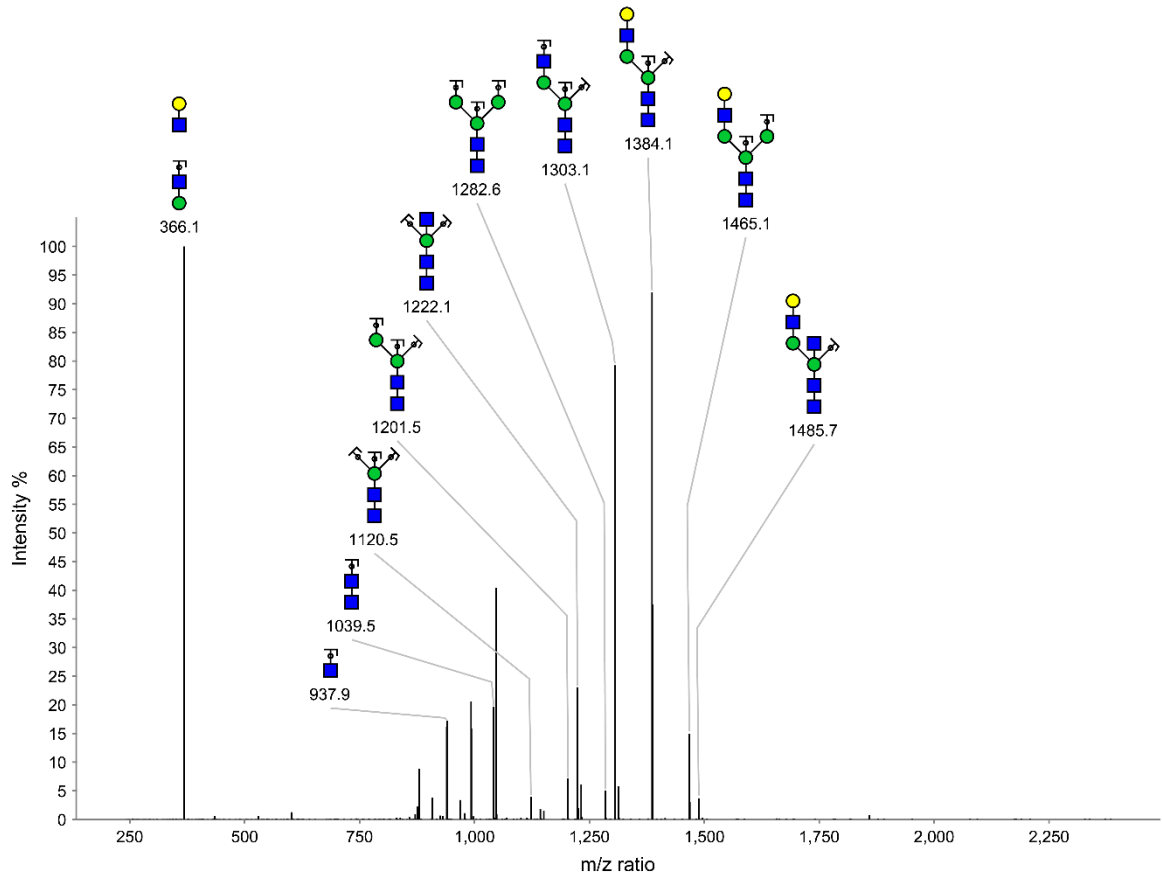

**IgG1 N297 Peptide 2: TKPREEQYNSTYR**

| Glycoform | Data set | Exact mass | Charge | Calculated mass | Observed mass | Retention time | Comment   |
|-----------|----------|------------|--------|-----------------|---------------|----------------|-----------|
| 5-5-0-1   | NK13     | 3787.5576  | 4      | 947.8964        | 947.8968      | 30.3 to 33.4   | Annotated |

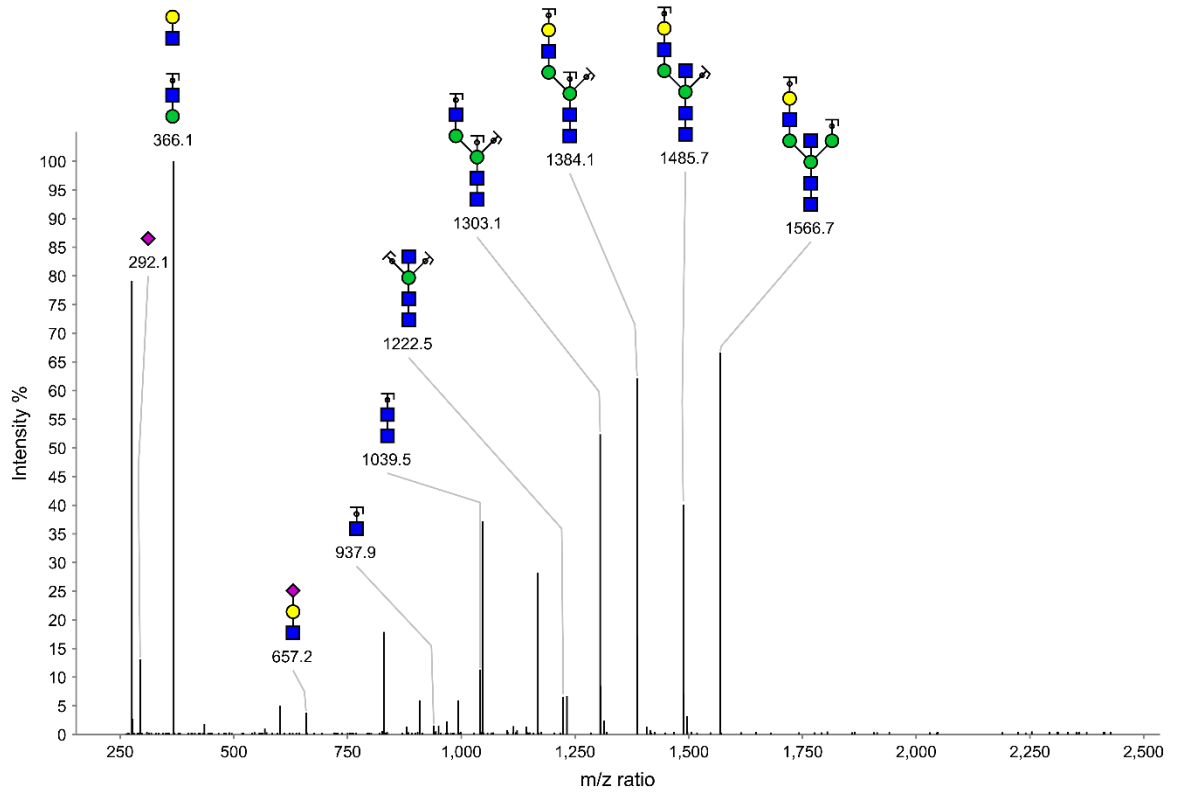

**IgG1 N297 Peptide 2: TKPREEQYNSTYR**



| Glycoform | Data set | Exact mass | Charge | Calculated mass | Observed mass | Retention time | Comment   |
|-----------|----------|------------|--------|-----------------|---------------|----------------|-----------|
| 5-5-1-0   | NK13     | 3642.5201  | 4      | 911.6370        | 911.6363      | 36.3 to 38.5   | Annotated |

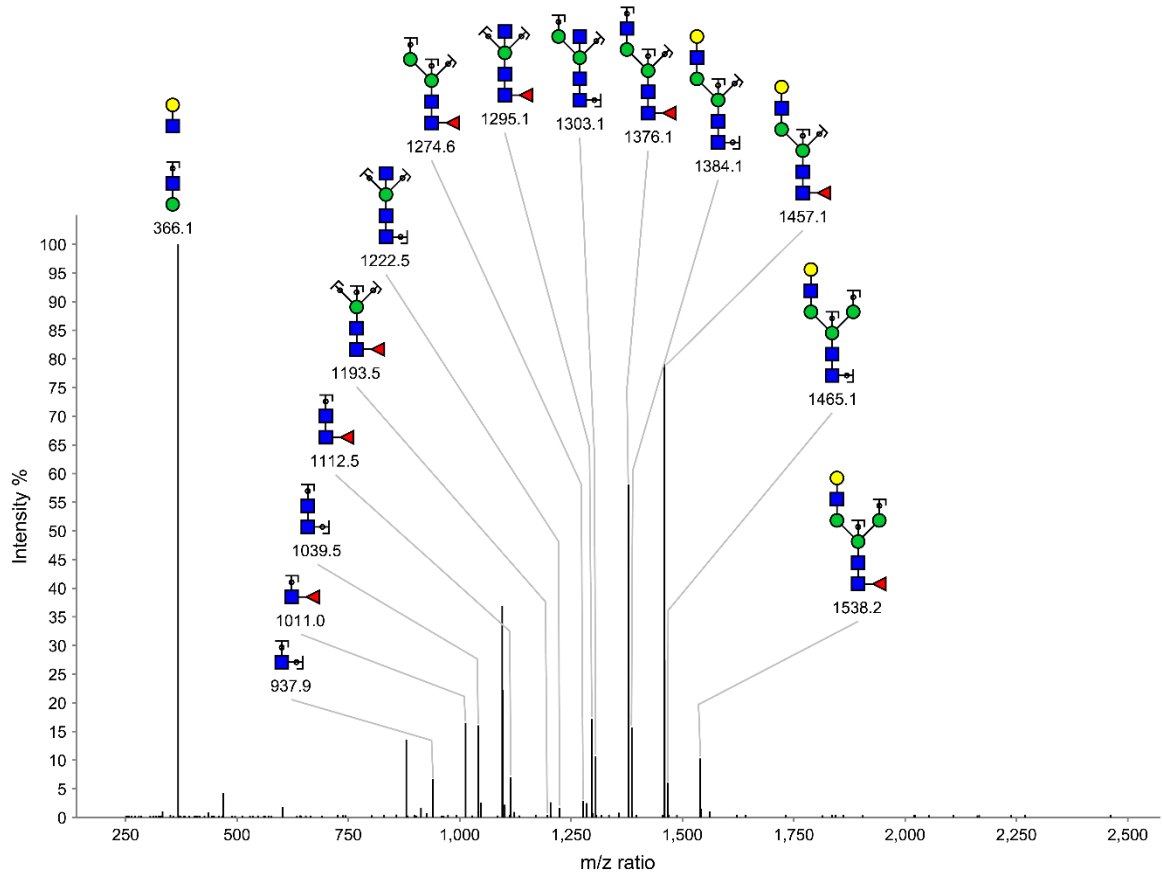

**IgG1 N297 Peptide 2: TKPREEQYNSTYR**

| Glycoform | Data set | Exact mass | Charge | Calculated mass | Observed mass | Retention time | Comment |
|-----------|----------|------------|--------|-----------------|---------------|----------------|---------|
| 5-3-1-0   | NK13     | 3318.4145  | 4      | 830.6106        | 830.6099      | 36.6 to 38.8   | No MS2  |

**IgG1 N297 Peptide 2: TKPREEQYNSTYR**
